# Supplementary material
Source: publisher figshare collection journal article supplement (https://acs.figshare.com/ndownloader/files/4550332)

## Supporting Information to Accompany:

# The Bryostatin 1 A-Ring Acetate is Not the Critical Determinant for Antagonism of Phorbol Ester-Induced Biological Responses

Gary E. Keck,<sup>a\*</sup> Wei Li,<sup>a</sup> Matthew B. Kraft,<sup>a</sup> Noemi Kedei,<sup>b</sup> Nancy E. Lewin,<sup>b</sup>  
and Peter M. Blumberg<sup>b</sup>

<sup>a</sup> *University of Utah, Department of Chemistry, Salt Lake City, Utah 84112*

<sup>b</sup> *Laboratory of Cancer Biology and Genetics, Center for Cancer Research, NCI, NIH, Bethesda, MD 20892*

[keck@chem.utah.edu](mailto:keck@chem.utah.edu)

### Table of Contents

|                                                                    |         |
|--------------------------------------------------------------------|---------|
| General Experimental Procedures                                    | S2-3    |
| Compounds and Numbering in Supporting Information                  | S4-7    |
| Synthetic Experimental Procedures and Analytical Data              | S8-39   |
| Summary of Stereochemical Evidence                                 | S39-40  |
| Binding Assays                                                     | S40-41  |
| Proliferation and Attachment Assays                                | S41-42  |
| Figures Summarizing Results of Proliferation and Attachment Assays | S43-45  |
| References                                                         | S46     |
| NMR Spectra of Analogues 11-13 and Synthetic Intermediates         | S47-106 |

**General Experimental Procedures:**

Solvents were purified according to the guidelines in *Purification of Common Laboratory Chemicals* (Perrin, Armarego, and Perrin, Pergamon: Oxford, 1966).<sup>1</sup> Diisopropylamine, diisopropylethylamine, pyridine, triethylamine, EtOAc, MeOH, and CH<sub>2</sub>Cl<sub>2</sub> were distilled from CaH<sub>2</sub>. The titer of *n*-BuLi was determined by the method of Eastham and Watson.<sup>2</sup> All other reagents were used without further purification. Yields were calculated for material judged homogenous by thin layer chromatography and nuclear magnetic resonance (NMR). Thin layer chromatography was performed on Merck Kieselgel 60 Å F254 plates or Silicycle 60Å F254 eluting with the solvent indicated, visualized by a 254 nm UV lamp, and stained with an ethanolic solution of 12-molybdophosphoric acid, or 4-anisaldehyde. Flash column chromatography was performed with Silicycle Flash Silica Gel 40 – 63 µm or Silicycle Flash Silica Gel 60 – 200 µm, slurry packed with 1% EtOAc/hexanes in glass columns. Glassware for reactions was oven dried at 125 °C and cooled under a dry nitrogen atmosphere prior to use. Liquid reagents and solvents were introduced by oven dried syringes through septum-sealed flasks under a nitrogen atmosphere. Nuclear magnetic resonance spectra were acquired at 500 MHz for <sup>1</sup>H and 125 MHz for <sup>13</sup>C. Chemical shifts for proton nuclear magnetic resonance (<sup>1</sup>H NMR) spectra are reported in parts per million relative to the signal of relative to the signal of residual CHCl<sub>3</sub> at 7.27 ppm. Chemicals shifts for carbon nuclear magnetic resonance (<sup>13</sup>C NMR and DEPT) spectra are reported in parts per million relative to the center line of the CDCl<sub>3</sub> triplet at 77.23 ppm. Chemical shifts of the unprotonated carbons (‘C’) for DEPT spectra were obtained by comparison with the <sup>13</sup>C NMR spectrum. The abbreviations s, d, apd, dd, ddd, dddd, ddddd, ddddd, t, td,

## Supporting Information

tt, q, dq, bs, and m stand for the resonance multiplicity singlet, doublet, apparent doublet, doublet of doublets, doublet of doublet of doublets, doublet of doublet of doublet of doublets, doublet of doublet of doublet of doublets of doublets, doublet of doublet of doublet of doublets of doublets, triplet, triplet of doublets, triplet of triplets, quartet, doublet of quartets, broad singlet, and multiplet, respectively. Optical rotations (Na D line) were obtained using a microcell with 1 dm path length. Specific rotations ( $[\alpha]$ , Unit:  $^{\circ}\text{cm}^2/\text{g}$ ) are based on the equation  $[\alpha] = (100 \cdot \alpha)/(l \cdot c)$  and are reported as unit-less numbers where the concentration  $c$  is in g/100 mL and the path length  $l$  is in decimeters. Mass spectrometry was performed at the mass spectrometry facility of the Department of Chemistry at The University of Utah on a double focusing high resolution mass spectrometer or at the mass spectrometry facility of the Department of Chemistry at the University of California, Riverside on an LCTOF mass spectrometer. Compounds were named using ChemDraw 11.0.

## Compounds and Numbering in Supporting Information:

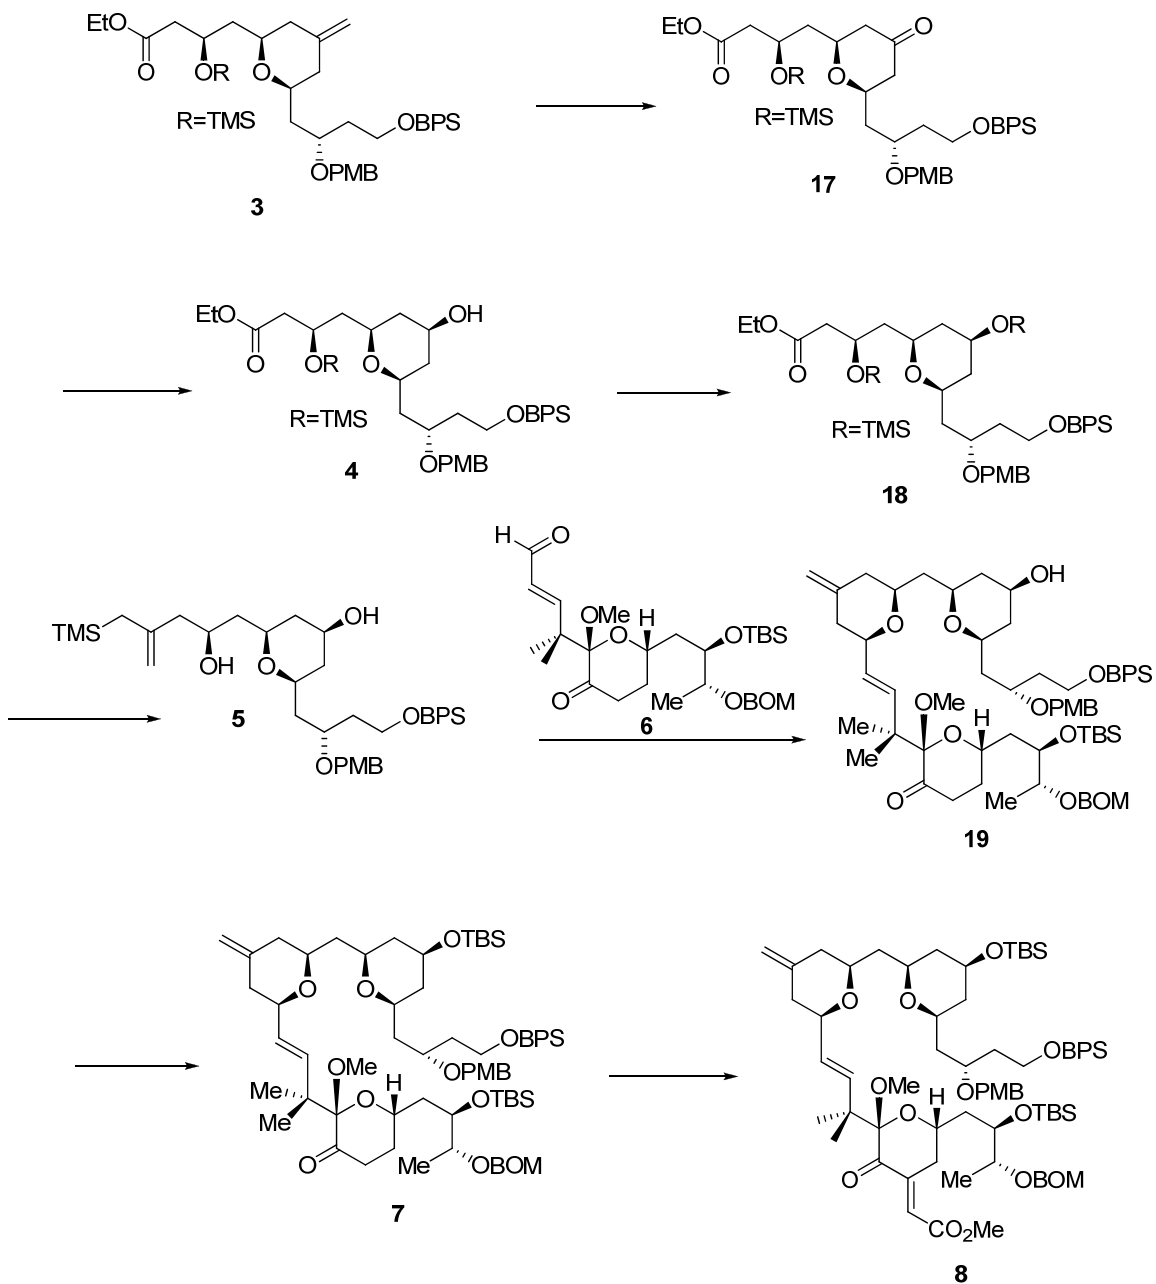

## Compounds and Numbering in Supporting Information (Cont.):

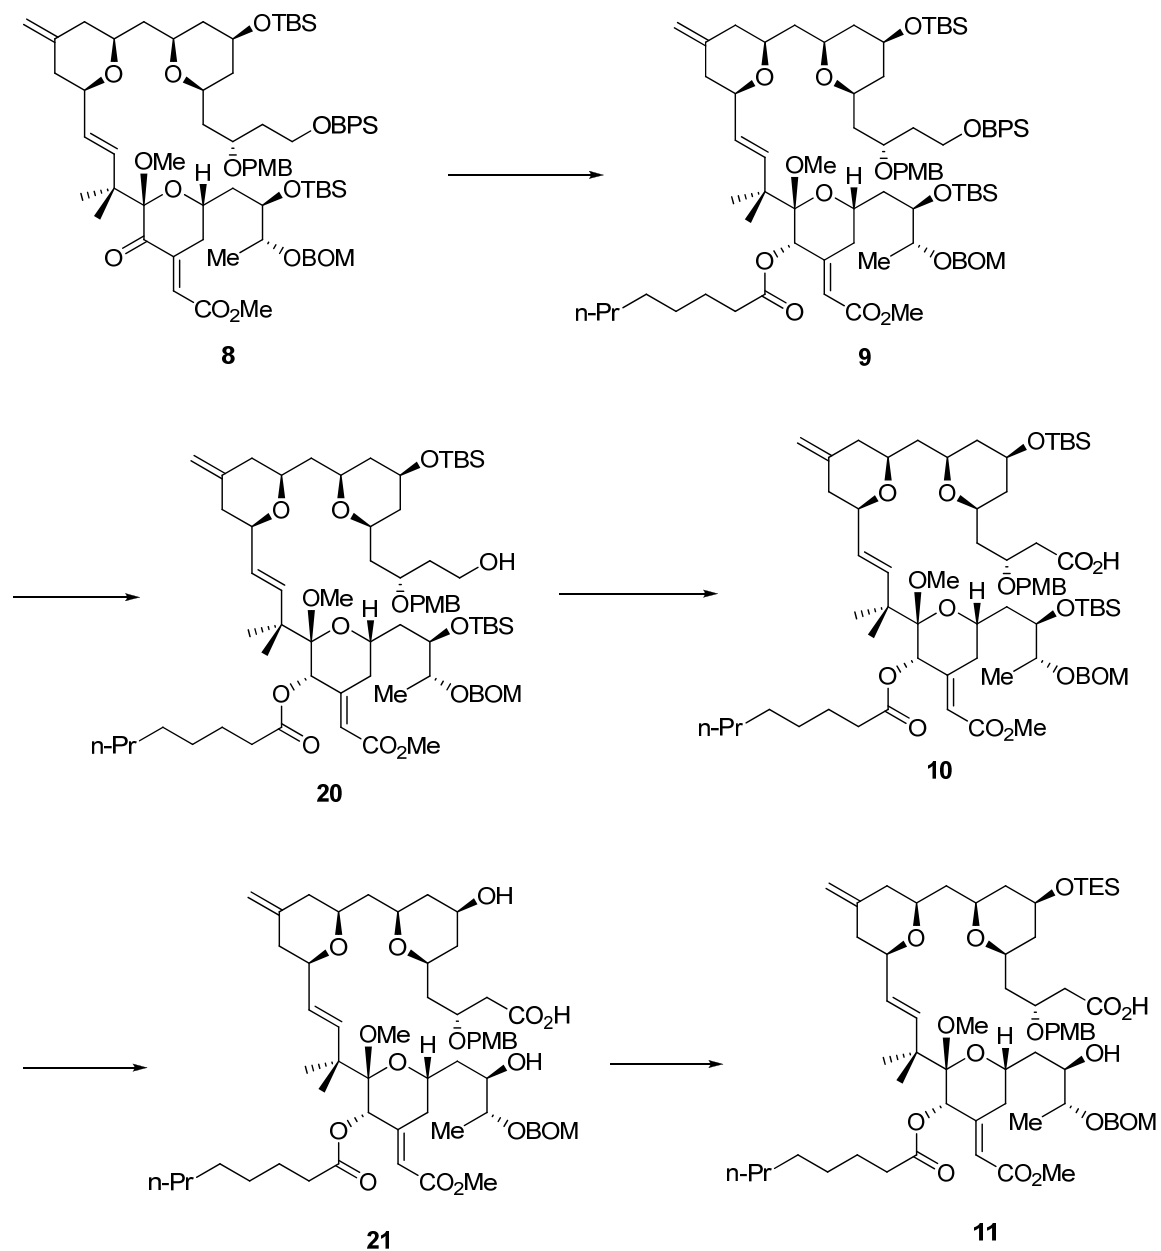

## Compounds and Numbering in Supporting Information (Cont.):

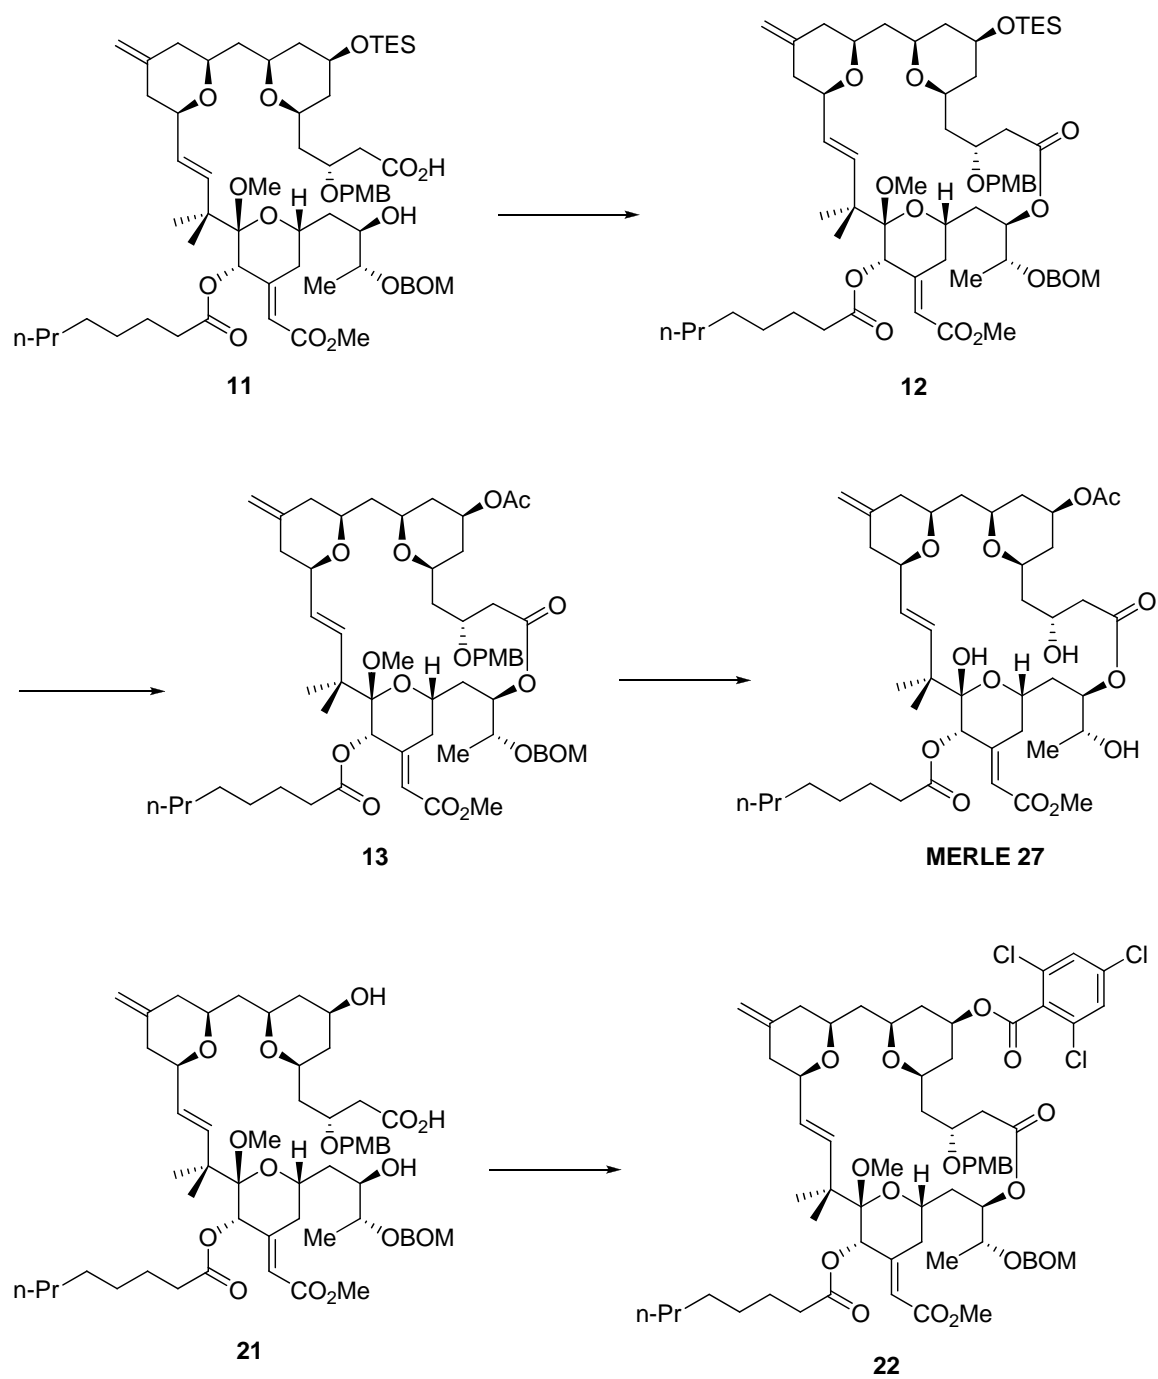

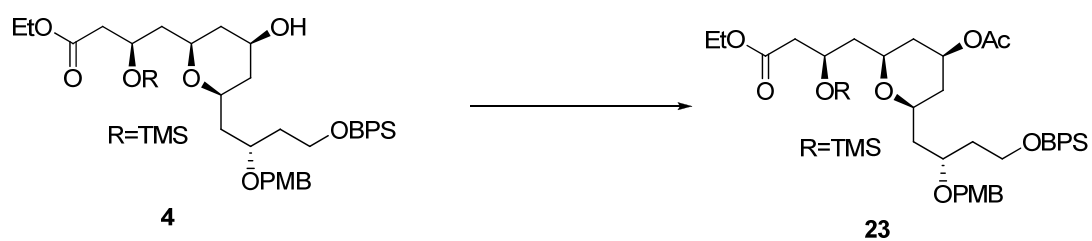

**Synthetic Experimental Procedures and Analytical Data:**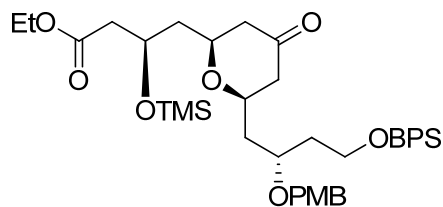**Preparation of (*R*)-ethyl 4-((*2S,6R*)-6-((*S*)-4-**

**(*tert*-butyldiphenylsilyloxy)-2-(4-methoxybenzyloxy)butyl)-4-oxotetrahydro-2H-**

**pyran-2-yl)-3-(trimethylsilyloxy)butanoate (17):** To a stirring solution of alkene **3**<sup>3</sup> (109.0 mg, 0.146 mmol, 1.0 equiv) in CH<sub>2</sub>Cl<sub>2</sub> (25 mL, 0.058 M) in a 50 ml rb flask was added NaHCO<sub>3</sub> (109.0 mg). The reaction mixture was cooled to -78 °C, and then a steady stream of ozone was bubbled through the solution for 1 min, during which time the solution developed a light grey color. The solution was then purged with a steady stream of oxygen until the grey color disappeared. Triphenylphosphine (115 mg, 0.438 mmol, 3.0 equiv) was added in one portion, and the reaction mixture was allowed to warm to rt and stir overnight. The solid NaHCO<sub>3</sub> was removed by filtration and the reaction was concentrated under reduced pressure to give a yellow oil. Purification was accomplished by flash chromatography on a 2 x 17 cm column, eluting with 20% EtOAc/hexanes, collecting 13 x 100 mm test tube fractions. The product containing fractions (6-10) were combined and concentrated under reduced pressure to give the product (98.8 mg, 91% yield) as colorless oil: *R*<sub>f</sub> = 0.27 ( 20% EtOAc/Hexanes);  $[\alpha]_D^{20} = +13.7$  (c=1.65, CHCl<sub>3</sub>); 500 MHz <sup>1</sup>H NMR (CDCl<sub>3</sub>) 7.69 (dd, *J* = 3.0, 1.4 Hz, 2H), 7.67 (dd, *J* = 3.0, 1.4 Hz, 2H), 7.45-7.36 (m, 6H), 7.16 (d, *J* = 8.7 Hz, 2H), 6.84 (d, *J* = 8.7 Hz, 2H), 4.47 (d, *J* = 11.1 Hz, 1H), 4.38-4.32 (m, 1H), 4.36 (d, *J* = 10.7 Hz, 1H), 4.08 (dddddd, *J* = 19.1, 10.7, 10.7, 7.1, 7.1, 7.1 Hz, 2H), 3.91 (dddd, *J* = 9.1, 5.7, 5.7, 3.0 Hz, 1H), 3.83 (dddd, *J* = 9.1, 9.1,



2.7, 2.7 Hz, 1H), 3.80 (m, 5H), 3.76-3.70 (m, 2H), 2.50 (dddd,  $J = 14.8, 14.8, 14.8, 7.7$  Hz, 2H), 2.40 (ddd,  $J = 14.4, 2.0, 2.0$  Hz, 1H), 2.33 (ddd,  $J = 14.4, 2.0, 2.0$  Hz, 1H), 2.25 (dd,  $J = 14.1, 11.8$  Hz, 1H), 2.20 (dd,  $J = 14.1, 11.8$  Hz, 1H), 1.96-1.86 (m, 2H), 1.84-1.73 (m, 2H), 1.72-1.62 (m, 2H), 1.20 (t,  $J = 7.4$  Hz, 3H), 1.06 (s, 9H), 0.10 (s, 9H); 125 MHz  $^{13}\text{C}$  NMR ( $\text{CDCl}_3$ )  $\delta$  207.1, 171.5, 159.3, 135.8, 135.8, 134.0, 134.0, 131.0, 129.8, 129.5, 127.9, 127.9, 114.0, 73.8, 73.6, 72.7, 71.6, 66.4, 60.6, 60.5, 55.5, 48.3, 48.1, 44.0, 42.8, 42.6, 37.4, 27.1, 19.4, 14.4, 0.5; 125 MHz DEPT  $^{13}\text{C}$  NMR ( $\text{CDCl}_3$ )  $\text{CH}_3$   $\delta$  55.5, 27.1, 14.4, 0.5;  $\text{CH}_2$   $\delta$  71.6, 60.6, 60.6, 48.3, 48.1, 44.0, 42.8, 42.6, 37.4;  $\text{CH}$   $\delta$  135.8, 129.8, 129.5, 129.5, 127.9, 73.8, 73.6, 72.7, 66.4;  $\text{C}$   $\delta$  207.1, 171.5, 159.3, 19.3; IR (neat) 2956, 1732, 1612, 1513, 1428, 1377, 1302, 1249, 1173, 1111, 1037, 842, 742, 703, 614, 542  $\text{cm}^{-1}$ ; HRMS (ESI/ APCI) calcd for  $\text{C}_{42}\text{H}_{60}\text{O}_8\text{NaSi}_2$  ( $\text{M}+\text{Na}$ ) 771.3719, found 771.3715.

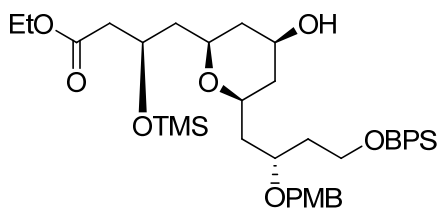

**Preparation of (R)-ethyl 4-((2R,4S,6S)-6-((S)-4-(tert-butyldiphenylsilyloxy)-2-(4-methoxybenzyloxy)butyl)-4-hydroxytetrahydro-2H-pyran-2-yl)-3-(trimethylsilyloxy)butanoate (4):** To a solution of ketone **17** (59.0 mg, 0.0788 mmol, 1.0 equiv) in MeOH (5.0 mL, 0.015M) in a 15 mL rb flask at 0 °C was added  $\text{NaBH}_4$  (6.0 mg, 0.158 mmol, 2.0 equiv) in one portion. After 30 min at 0 °C, the reaction was quenched by addition of acetone (0.1 mL), and then concentrated under reduced pressure. Purification was accomplished by flash chromatography column on a 3 x 12 cm column, eluting with 40% EtOAc/hexanes, collecting 18 x 150 mm test tube fractions. The product containing fractions (6-10) were combined and concentrated under

reduced pressure to give the alcohol product **4** (55.6 mg, 94% yield) as colorless oil:  $R_f$  = 0.40 ( 50% EtOAc/Hexanes);  $[\alpha]_D^{20}$  = +16 (  $c$ =0.29,  $\text{CHCl}_3$ ); 500 MHz  $^1\text{H}$  NMR ( $\text{CDCl}_3$ )  $\delta$  7.70-7.66 (m, 4H), 7.46-7.37 (m, 6H), 7.17 (d,  $J$  = 8.7 Hz, 2H), 6.84 (d,  $J$  = 8.7 Hz, 2H), 4.45 (d,  $J$  = 10.8 Hz, 1H), 4.38 (d,  $J$  = 11.1 Hz, 1H), 4.40-4.32 (m, 1H), 4.15-4.02 (dddddd,  $J$  = 18.1, 10.7, 10.7, 7.1, 7.1, 7.1 Hz, 2H), 3.91-3.86 (m, 1H), 3.82-3.74 (m, 7H), 3.56-3.50 (m, 1H), 3.46-3.39 (m, 1H), 2.50 (d,  $J$  = 5.5 Hz, 1H), 2.49 (d,  $J$  = 3.0 Hz, 1H), 1.97 (ddd,  $J$  = 12.4, 4.4, 2.4 Hz, 1H), 1.90-1.76 (m, 4H), 1.68-1.45 (m, 5H), 1.20 (t,  $J$  = 7.1 Hz, 3H), 1.06 (s, 9H), 0.12 (s, 9H); 125 MHz  $^{13}\text{C}$  NMR ( $\text{CDCl}_3$ )  $\delta$  171.8, 159.3, 135.8, 135.8, 134.1, 134.1, 131.2, 129.8, 129.5, 127.9, 127.9, 114.0, 72.9, 72.1, 72.1, 71.7, 68.3, 66.8, 60.7, 60.5, 55.5, 43.9, 42.9, 42.3, 41.8, 41.5, 37.8, 27.1, 19.4, 14.4, 0.5; 125 MHz DEPT  $^{13}\text{C}$  NMR ( $\text{CDCl}_3$ )  $\text{CH}_3$   $\delta$  55.5, 27.1, 14.4, 0.5;  $\text{CH}_2$   $\delta$  71.7, 60.7, 60.5, 43.9, 42.9, 42.3, 41.8, 41.5, 37.8;  $\text{CH}$   $\delta$  135.8, 135.8, 129.8, 129.5, 127.9, 127.9, 114.0, 72.9, 72.1, 68.4, 66.8;  $\text{C}$   $\delta$  171.8, 159.3, 134.1, 134.1, 131.2, 19.4; IR (neat) 3440, 2940, 1735, 1612, 1513, 1428, 1376, 1250, 1175, 1109, 1037, 741, 704, 613, 536  $\text{cm}^{-1}$ ; HRMS (ESI/ APCI) calcd for  $\text{C}_{42}\text{H}_{62}\text{O}_8\text{Na}$  ( $\text{M}+\text{Na}$ ) 773.3881, found 773.3886.

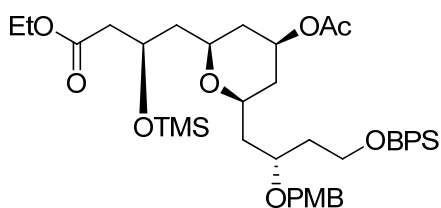

**Preparation of (R)-ethyl 4-((2R,4S,6R)-4-acetoxy-6-((S)-4-(tert-butyldiphenyl silyloxy) -2-(4-methoxy benzyloxy) butyl) tetrahydro-2H-pyran-2-yl)-3-(trimethyl silyloxy) butanoate (**23**):** To a stirring solution of alcohol **4** (25.0 mg, 0.0333 mmol, 1.0 equiv.) in  $\text{CH}_2\text{Cl}_2$  (3.3 mL, 0.01 M) in a 15 mL rb flask at rt was added DMAP (4.1 mg, 0.0333 mmol, 1.0 equiv.), pyridine (105.4 mg, 1.332 mmol, 40.0 equiv.), and  $\text{Ac}_2\text{O}$  (68.0 mg, 0.666 mmol, 20.0 equiv.) via syringe. The reaction was

## Supporting Information

stirred at rt overnight. The reaction was quenched by the addition of saturated aqueous NaHCO<sub>3</sub> solution (5 mL). The phases were separated and the aqueous phase was extracted with CH<sub>2</sub>Cl<sub>2</sub> (3 x 10 mL). The organic phases were combined, dried over Na<sub>2</sub>SO<sub>4</sub>, and concentrated under reduced pressure. Purification was accomplished by flash chromatography on a 2 x 12 cm column, eluting with 50% EtOAc/hexane, collecting 13 x 100 mm test tube fractions. The product containing fractions (2-4) were combined and concentrated under reduced pressure to give the product **24** (12.1 mg, 46% yield) as colorless oil:  $R_f$  = 0.34 (20% EtOAc/Hexanes);  $[\alpha]_D^{20}$  = +9 (c=0.27, CHCl<sub>3</sub>); 500 MHz <sup>1</sup>H NMR (CDCl<sub>3</sub>)  $\delta$  7.70-7.66 (m, 4H), 7.45-7.36 (m, 6H), 7.17 (d,  $J$  = 8.3 Hz, 2H), 6.85 (d,  $J$  = 8.8 Hz, 2H), 4.88 (dddd,  $J$  = 11.2, 11.2, 4.9, 4.9 Hz, 1H), 4.45 (d,  $J$  = 10.7 Hz, 1H), 4.36 (d,  $J$  = 11.2 Hz, 1H), 4.33 (dddd,  $J$  = 6.3, 6.3, 6.3, 6.3 Hz, 1H), 4.07 (dddddd,  $J$  = 18.1, 10.7, 10.7, 7.3, 7.3, 7.3 Hz, 2H), 3.86 (m, 1H), 3.82-3.74 (m, 5H), 3.62-3.56 (m, 1H), 3.52-3.46 (m, 1H), 2.48 (d,  $J$  = 2.9 Hz, 1H), 2.47 (s, 1H), 2.05 (s, 3H), 2.03-2.00 (m, 1H), 1.92-1.76 (m, 5H), 1.70-1.56 (m, 4H), 1.20 (t,  $J$  = 7.3 Hz, 3H), 1.07 (s, 9H), 0.12 (s, 9H); 125 MHz <sup>13</sup>C NMR (CDCl<sub>3</sub>)  $\delta$  171.7, 170.6, 159.3, 135.8, 134.0, 134.0, 131.1, 129.8, 129.5, 127.8, 114.0, 72.8, 72.1, 72.0, 71.8, 70.6, 66.7, 60.7, 60.5, 55.5, 43.9, 42.9, 42.2, 37.8, 37.7, 37.6, 27.1, 21.5, 19.4, 14.4, 0.5; 125 MHz DEPT <sup>13</sup>C NMR (CDCl<sub>3</sub>) CH<sub>3</sub>  $\delta$  55.5, 27.1, 21.5, 14.4, 0.5; CH<sub>2</sub>  $\delta$  71.8, 60.7, 60.5, 43.9, 42.9, 42.2, 37.8, 37.7, 37.6; CH  $\delta$  135.8, 129.8, 129.5, 127.8, 114.0, 72.8, 72.1, 72.0, 70.6, 66.7; C  $\delta$  171.7, 170.6, 159.3, 134.0, 134.0, 131.1, 19.4; IR (neat) 2953, 2859, 1738, 1612, 1513, 1428, 1365, 1247, 1175, 1109, 1033, 842, 741, 704, 612, 536 cm<sup>-1</sup>; HRMS (ESI/ APCI) calcd C<sub>44</sub>H<sub>64</sub>O<sub>9</sub>NaSi<sub>2</sub> for (M+Na) 815.3987, found 815.4017.

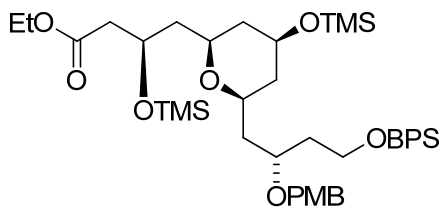

**Preparation of (*R*)-ethyl 4-((2*R*,4*S*,6*R*)-6-((*S*)-4-(*tert*-**

**butyl)phenylsilyloxy)-2-(4-methoxybenzyloxy)butyl)-4-(trimethylsilyloxy)**

**tetrahydro-2*H*-pyran-2-yl)-3-(trimethylsilyloxy)butanoate (18):** To a solution of alcohol **4** (83.1 mg, 0.111 mmol, 1.0 equiv) in CH<sub>2</sub>Cl<sub>2</sub> (11 mL, 0.01 M) in a 25 mL rb flask was added TMSCl (60.3 mg, 0.555 mmol, 5.0 equiv) and NEt<sub>3</sub> (112.3 mg, 1.11 mmol, 10.0 equiv) dropwise via syringe. After 12 h at rt, the reaction was quenched by the addition of water (5.0 mL). The phases were separated and the aqueous phase was extracted with Et<sub>2</sub>O (3 x 10 mL). The organic phases were combined, dried over Na<sub>2</sub>SO<sub>4</sub> and concentrated under reduced pressure. Purification was accomplished by flash chromatography on a 3.5 x 13 cm column, eluting with 10% EtOAc/hexanes, collecting 18 mm x 150 mm test tube fractions. The product containing fractions (5-9) were combined and concentrated under reduced pressure to give the product **18** (87.6 mg, 96% yield) as colorless oil: *R*<sub>f</sub> = 0.52 (20% EtOAc/Hexanes);  $[\alpha]_D^{20} = +12.5$  (c = 2.71, CHCl<sub>3</sub>); 500 MHz <sup>1</sup>H NMR (CDCl<sub>3</sub>) δ 7.69 (ddd, *J* = 4.4, 1.4, 1.4 Hz, 2H), 7.67 (dd, *J* = 4.0, 1.7 Hz, 2H), 7.45-7.35 (m, 6H), 7.18 (d, *J* = 8.7 Hz, 2H), 6.85 (d, *J* = 8.7 Hz, 2H), 4.45 (d, *J* = 11.1 Hz, 1H), 4.37 (d, *J* = 11.1 Hz, 1H), 4.37-4.30 (m, 1H), 4.14-4.02 (m, 2H), 3.90-3.84 (m, 1H), 3.80 (s, 3H), 3.80-3.71 (m, 3H), 3.56-3.50 (m, 1H), 3.45-3.38 (m, 1H), 2.50 (d, *J* = 4.7 Hz, 1H), 2.48 (d, *J* = 2.7 Hz, 1H), 1.86-1.72 (m, 5H), 1.66-1.54 (m, 3H), 1.20 (t, *J* = 7.1 Hz, 3H), 1.05 (s, 9H), 0.13 (s, 9H), 0.11 (s, 9H); 125 MHz <sup>13</sup>C NMR (CDCl<sub>3</sub>) δ 171.8, 159.3, 135.8, 135.8, 134.1, 134.1, 129.8, 129.6, 127.9, 114.0, 72.9, 72.2, 72.1,

71.8, 68.8, 66.8, 60.7, 60.5, 55.5, 44.0, 43.1, 42.3, 42.3, 41.9, 37.7, 27.1, 19.4, 14.4, 0.5, 0.5; 125 MHz DEPT  $^{13}\text{C}$  NMR ( $\text{CDCl}_3$ )  $\text{CH}_3$   $\delta$  55.5, 27.1, 14.4, 0.5, 0.5;  $\text{CH}_2$   $\delta$  71.8, 60.7, 60.5, 44.0, 43.1, 42.3, 42.3, 41.9, 37.7;  $\text{CH}$   $\delta$  135.8, 129.8, 129.6, 127.9, 114.0, 72.9, 72.2, 72.1, 68.8, 66.8;  $\text{C}$   $\delta$  171.8, 159.3, 135.8, 134.1, 134.1, 19.4; IR (neat) 3071, 2952, 2859, 1613, 1588, 1467, 1428, 1377, 1302, 1250, 1175, 1110, 744  $\text{cm}^{-1}$ ; HRMS (ESI/ APCI) calcd for  $\text{C}_{45}\text{H}_{70}\text{O}_8\text{NaSi}_3$  ( $\text{M}+\text{Na}$ ) 845.4271, found 845.4263.

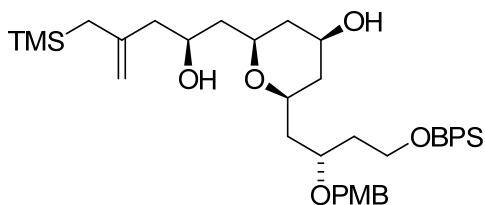

**Preparation of (2*S*,4*R*,6*S*)-2-((*S*)-4-(*tert*-butyldiphenylsilyloxy)-2-(4-methoxybenzyloxy)butyl)-6-((*S*)-2-hydroxy-4-**

**((trimethylsilyl) methyl)pent-4-enyl)tetrahydro-2H-pyran-4-ol (5):** Powered  $\text{CeCl}_3 \cdot 7\text{H}_2\text{O}$  (757.0 mg, 2.03 mmol, 10.0 equiv) was placed in a 10 mL rb flask and heated to 170  $^\circ\text{C}$  under vacuum. After 16 h at 170  $^\circ\text{C}$ , the dried  $\text{CeCl}_3$  was cooled to rt, and the flask was purged with  $\text{N}_2$ . THF (2.5 mL) was added, and the mixture was stirred at rt for 2 h. Meanwhile, a 25 mL three-necked rb flask equipped with condenser and magnetic stir bar was charged with magnesium turnings (124.0 mg, 5 mmol, 1.0 equiv), and a crystal of iodine. The flask was heated with a heat gun for 5 min while stirring. THF (5.0 mL) was added into the reaction via syringe, and the reaction mixture was heated with the heat gun to reflux.  $\text{TMSCH}_2\text{Cl}$  (0.613 g, 5.0 mmol, 1.0 equiv) was then added to the reaction dropwise via syringe. The reaction was stirred at rt for 1.5 h to give an assumed 1.0 M solution of  $\text{TMSCH}_2\text{MgCl}$ . The  $\text{CeCl}_3/\text{THF}$  mixture was cooled to  $-78^\circ\text{C}$ , then a solution of  $\text{TMSCH}_2\text{MgCl}$  (2.03 mL, 2.03 mmol, 10.0 equiv) was added to the reaction dropwise via syringe. After 1 h at  $-78^\circ\text{C}$ , ester **18** (167.2 mg, 0.203 mmol, 1.0 equiv) in

## Supporting Information

THF (1.0 mL) was added to the reaction via cannula. An additional THF (0.6 mL) rinse was used to transfer the remaining ester residue into the reaction mixture. The solution was allowed to warm to rt and stirred overnight. The mixture was then cooled to -78 °C, and then a 1N aqueous HCl solution (4.0 mL) was added to the mixture dropwise via syringe. The reaction mixture was then allowed to warm to rt and the phases were separated. The aqueous phase was extracted with Et<sub>2</sub>O (3 x 10 mL). The organic phases were combined, washed with saturated aqueous NaHCO<sub>3</sub> solution (10 mL), dried over Na<sub>2</sub>SO<sub>4</sub>, and concentrated under reduced pressure. Purification was accomplished by flash chromatography on a 3 x 12 cm column, eluting with 50% EtOAc/hexanes, collecting 18 x 150 mm test tube fractions. The product containing fractions (19-22) were combined and concentrated under reduced pressure to give the product **5** (103.4 mg, 71% yield) as a colorless oil:  $R_f = 0.31$  ( 50% EtOAc/Hexanes);  $[\alpha]_D^{20} = +15.8$  (  $c=1.04$ , CHCl<sub>3</sub>); 500 MHz <sup>1</sup>H NMR (CDCl<sub>3</sub>)  $\delta$  7.69 (dd,  $J = 11.4, 1.7$  Hz, 2H), 7.68 (dd,  $J = 4.4, 1.3$  Hz, 2H), 7.46-7.38 (m, 6H), 7.21 (d,  $J = 8.4$  Hz, 2H), 6.86 (d,  $J = 8.6$  Hz, 2H), 4.67 (dd,  $J = 14.1, 2.0$  Hz, 2H), 4.46 (d,  $J = 11.1$  Hz, 1H), 4.37 (d,  $J = 11.1$  Hz, 1H), 4.00-3.94 (m, 1H), 3.81-3.74 (m, 6H), 3.60-3.50 (m, 2H), 3.44 (bs, 1H), 2.22 (dd,  $J = 13.8, 7.1$  Hz, 1H), 2.07 (dd,  $J = 13.8, 6.0$  Hz, 1H), 1.96 (ddd,  $J = 12.1, 2.4, 2.0$  Hz, 1H), 1.87 (ddd,  $J = 12.4, 2.4, 2.4$  Hz, 1H), 1.84-1.78 (m, 3H), 1.72-1.60 (m, 5H), 1.57 (s, 2H), 1.07 (s, 9H), 0.05 (s, 9H); 125 MHz <sup>13</sup>C NMR (CDCl<sub>3</sub>)  $\delta$  159.3, 144.6, 135.8, 134.0, 134.0, 131.1, 129.8, 129.7, 127.8, 127.8 114.0, 110.1, 76.3, 72.8, 72.5, 71.6, 69.5, 67.8, 60.5, 55.4, 46.6, 42.4, 41.8, 41.6, 41.5, 37.5, 27.1, 27.1, 19.3, -1.2; 125 MHz DEPT <sup>13</sup>C NMR (CDCl<sub>3</sub>) CH<sub>3</sub>  $\delta$  55.4, 27.1, -1.2; CH<sub>2</sub>  $\delta$  101.1, 71.6, 60.5, 46.6, 42.4, 41.8, 41.6, 41.5, 37.5, 27.1; CH  $\delta$  135.8, 129.8, 129.7, 127.8, 127.8, 114.0, 76.3, 72.8, 72.5, 69.5, 67.8 C

$\delta$  159.3, 144.6, 134.0, 134.0, 131.1, 19.3; IR (neat) 3441, 2941, 1612, 1513, 1427, 1248, 1111, 1037, 848, 738, 702, 614, 541, 505  $\text{cm}^{-1}$ ; HRMS (ESI/ APCI) calcd for  $\text{C}_{42}\text{H}_{62}\text{O}_6\text{NaSi}_2$  ( $\text{M}+\text{Na}$ ) 741.3977, found 741.3979.

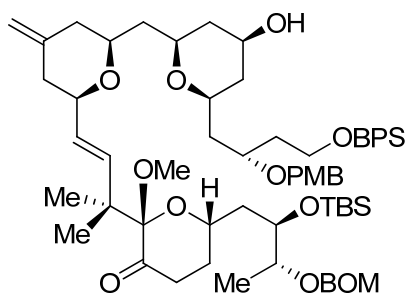

**Preparation of (2*S*,6*S*)-6-((2*R*,3*R*)-3-(benzyloxy methoxy)-2-(*tert*-butyldimethylsilyloxy)butyl)-2-((*E*)-4-(6-(((4*S*)-6-((*S*)-4-(*tert*-butyl diphenylsilyloxy)-2-(4-methoxy benzyloxy)butyl)-4-hydroxytetrahydro-2*H*-pyran-2-yl)methyl)-4-methylenetetrahydro-2*H*-pyran-2-yl)-2-methylbut-3-en-2-yl)-2-**

**methoxydihydro-2*H*-pyran-3(4*H*)-one (19):** To a solution of hydroxyallylsilane **5** (31.6 mg, 0.0439 mmol, 1.1 equiv) and aldehyde **6**<sup>3</sup> (21.9 mg, 0.0399 mmol, 1.0 equiv) in  $\text{Et}_2\text{O}$  (4.0 mL) in a 10 mL rb flask at  $-78^\circ\text{C}$  was added a 1.0 M solution of TMSOTf in  $\text{Et}_2\text{O}$  (47.9  $\mu\text{L}$ , 0.0479 mmol, 1.2 equiv) dropwise via syringe. After 1 h at  $-78^\circ\text{C}$ , the reaction was quenched by the addition of diisopropylethylamine (0.2 mL), followed by the addition of saturated aqueous  $\text{NaHCO}_3$  solution (2 mL). The mixture was warmed to rt, the phases were separated and the aqueous phase was extracted with  $\text{Et}_2\text{O}$  (3 x 10 mL). The organic phases were combined, dried over  $\text{Na}_2\text{SO}_4$ , and concentrated under reduced pressure. Purification was accomplished by flash chromatography column on a 3 x 12 cm column, eluting with 40%  $\text{EtOAc}$ /hexanes, collecting 13 x 100 mm test tube fractions. The product containing fractions (7-15) were combined and concentrated under reduced pressure to give the product **19** (43.0 mg, 92% yield) as colorless oil.  $R_f = 0.38$  ( 50%

## Supporting Information

EtOAc/Hexanes);  $[\alpha]_D^{20} = +14$  (  $c=0.08$ ,  $\text{CHCl}_3$ ); 500 MHz  $^1\text{H}$  NMR ( $\text{CDCl}_3$ )  $\delta$  7.70-7.66 (m, 4H), 7.45-7.34 (m, 11H), 7.18 (d,  $J = 8.7$  Hz, 2H), 6.84 (d,  $J = 8.4$  Hz, 2H), 6.06 (dd,  $J = 16.1, 1.0$  Hz, 1H), 5.45 (dd,  $J = 16.1, 6.0$  Hz, 1H), 4.79 (d,  $J = 1.3$  Hz, 2H), 4.66-4.58 (m, 2H), 4.63 (s, 2H), 4.46 (d,  $J = 11.1$  Hz, 1H), 4.37 (d,  $J = 10.8$  Hz, 1H), 4.13-4.04 (m, 2H), 3.95-3.89 (m, 1H), 3.84-3.76 (m, 9H), 3.60-3.46 (m, 3H), 3.29 (s, 3H), 2.45 (d,  $J = 6.4$  Hz, 1H), 2.43 (d,  $J = 5.7$  Hz, 1H), 2.24 (d,  $J = 13.1$  Hz, 1H), 2.18 (d,  $J = 13.4$  Hz, 1H), 2.02-1.91 (m, 6H), 1.91-1.84 (m, 2H), 1.83-1.71 (m, 2H), 1.68-1.48 (m, 6H), 1.15 (d,  $J = 6.4$  Hz, 3H), 1.12 (s, 3H), 1.09 (s, 3H), 1.05 (s, 9H), 0.88 (s, 9H), 0.09 (s, 3H), 0.08 (s, 3H); 125 MHz  $^{13}\text{C}$  NMR ( $\text{CDCl}_3$ )  $\delta$  207.7, 159.3, 144.3, 138.0, 137.2, 135.8, 135.8, 134.1, 134.0, 131.2, 129.8, 129.6, 129.1, 128.6, 128.6, 128.0, 128.0, 127.9, 127.9, 114.0, 109.1, 104.1, 93.4, 79.1, 75.2, 75.0, 72.7, 72.1, 72.0, 72.0, 70.7, 69.9, 69.6, 68.4, 60.6, 55.5, 55.5, 52.8, 44.4, 42.5, 42.3, 41.8, 41.4, 41.2, 40.5, 38.2, 37.9, 37.7, 30.6, 27.1, 26.1, 23.2, 22.1, 19.4, 18.3, 13.9, -3.8, -4.5; 125 MHz DEPT  $^{13}\text{C}$  NMR ( $\text{CDCl}_3$ )  $\text{CH}_3$   $\delta$  55.5, 52.8, 27.1, 26.1, 23.2, 22.1, 13.9, -3.9, -4.5;  $\text{CH}_2$   $\delta$  109.1, 93.4, 72.0, 69.6, 60.6, 42.5, 42.3, 41.8, 41.4, 41.2, 40.5, 38.2, 37.9, 37.7, 30.6;  $\text{CH}$   $\delta$  137.2, 135.8, 135.8, 129.8, 129.6, 129.1, 128.6, 128.6, 128.0, 128.0, 127.9, 127.9, 114.0, 79.1, 75.2, 75.0, 72.7, 72.1, 72.0, 70.7, 69.9, 68.4,  $\text{C}$   $\delta$  207.7, 159.3, 144.3, 138.0, 134.1, 134.0, 131.2, 104.1, 44.4, 19.4, 18.3; IR (neat) 3445, 2931, 2857, 1724, 1612, 1513, 1465, 1383, 1251, 1110, 1042, 835, 776, 739, 702, 612, 536  $\text{cm}^{-1}$ ; HRMS (ESI/ APCI) calcd for  $\text{C}_{69}\text{H}_{100}\text{O}_{12}\text{NaSi}_2$  ( $\text{M}+\text{Na}$ ) 1199.6646, found 1199.6636.



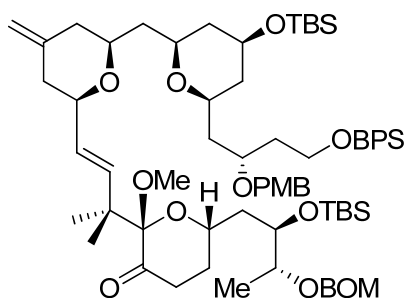

### Preparation of (2*S*,6*S*)-6-((2*R*,3*R*)-3-

(benzyloxymethoxy)-2-(*tert*-butyldimethyl silyloxy) butyl)-2-((*E*)-4-((2*R*,6*S*)-6-(((2*S*,4*S*,6*R*)-4-(*tert*-butyldimethyl silyloxy)-6-((*S*)-4-(*tert*-butyldiphenylsilyloxy)-2-(4-methoxybenzyloxy)butyl) tetrahydro-2*H*-pyran-2-yl)methyl)-4-methylenetetrahydro-2*H*-pyran-2-yl)-2-methylbut-3-en-2-yl)-2-methoxydihydro-2*H*-pyran-3(4*H*)-

**one (7):** To a solution of alcohol **19** (83.8 mg, 0.0712 mmol, 1.0 equiv) in CH<sub>2</sub>Cl<sub>2</sub> (7.1 mL, 0.001M) in a 25 mL rb flask at 0 °C was added diisopropylethylamine (45.8 mg, 0.427 mmol, 6.0 equiv) and TBSOTf (47.0 mg, 0.178 mmol, 2.5 equiv) via syringe. The solution was stirred at 0 °C for 40 min, then quenched by the addition of 1.0 mL of methanol. Stirring was continued for another 10 min, and then saturated aqueous NaHCO<sub>3</sub> solution (5 mL) was added. The aqueous phase was separated and extracted with CH<sub>2</sub>Cl<sub>2</sub> (3 x 10 mL). The organic phases were combined, dried over Na<sub>2</sub>SO<sub>4</sub> and concentrated under reduced pressure. Purification was accomplished by flash chromatography on a 4 x 10 cm column, eluting with 10% EtOAc/hexanes, collecting 18 x 150 mm test tube fractions. The product containing fractions (6-13) were combined and concentrated under reduced pressure to give the product **7** (89.3 mg, 98% yield) as a colorless oil. *R*<sub>f</sub> = 0.73 ( 20% EtOAc/Hexanes); [*α*]<sub>D</sub><sup>20</sup> = +8.1 ( *c*=0.40, CHCl<sub>3</sub>); 500 MHz <sup>1</sup>H NMR (CDCl<sub>3</sub>) δ 7.70-7.66 (m, 4H), 7.44-7.35 (m, 11H), 7.20 (d, *J* = 8.8 Hz, 2H), 6.86 (d, *J* = 8.3 Hz, 2H), 6.02 (d, *J* = 5.6 Hz, 1H), 5.47 (dd, *J* = 16.1, 6.3 Hz, 1H), 4.78 (dd, *J* = 10.3, 6.8 Hz, 2H), 4.65 (s, 1H), 4.63 (s, 2H), 4.56 (s, 1H), 4.46 (d, *J* = 10.7

Hz, 1H), 4.38 (d,  $J = 10.7$  Hz, 1H), 4.14-4.04 (m, 2H), 3.95-3.88 (m, 1H), 3.85-3.71 (m, 8H), 3.60-3.50 (m, 2H), 3.50-3.44 (m, 1H), 3.29 (s, 3H), 2.43 (dd,  $J = 8.3, 5.9$  Hz, 2H), 2.29 (d,  $J = 13.2$  Hz, 1H), 2.17 (d,  $J = 13.2$  Hz, 1H), 2.04-1.90 (m, 6H), 1.86-1.72 (m, 5H), 1.68-1.48 (m, 5H), 1.16 (d,  $J = 6.3$  Hz, 3H), 1.12 (s, 3H), 1.09 (s, 3H), 1.06 (s, 9H), 0.89 (s, 9H), 0.88 (s, 9H), 0.09 (s, 3H), 0.08 (s, 3H), 0.07 (s, 3H), 0.06 (s, 3H); 125 MHz  $^{13}\text{C}$  NMR ( $\text{CDCl}_3$ )  $\delta$  207.4, 159.3, 144.4, 138.1, 137.1, 135.8, 135.8, 134.1, 134.0, 131.3, 129.8, 129.8, 129.6, 129.4, 128.6, 128.0, 127.9, 127.9, 114.0, 109.0, 104.1, 93.4, 79.2, 75.3, 75.1, 72.9, 72.2, 72.0, 72.0, 70.8, 69.9, 69.6, 69.1, 60.6, 55.5, 52.8, 44.4, 42.8, 42.5, 42.5, 42.1, 41.2, 40.4, 38.2, 38.0, 37.7, 30.7, 27.2, 26.1, 23.3, 21.9, 19.4, 18.3, 18.3, 14.0, -3.9, -4.2, -4.3, -4.4; 125 MHz DEPT  $^{13}\text{C}$  NMR ( $\text{CDCl}_3$ )  $\text{CH}_3$   $\delta$  55.5, 52.8, 27.2, 26.1, 23.3, 21.9, 14.0, -3.9, -4.2, -4.3, -4.4;  $\text{CH}_2$   $\delta$  109.0, 93.4, 72.2, 69.6, 60.6, 42.8, 42.5, 42.5, 42.1, 41.2, 40.4, 38.2, 38.0, 37.7, 30.7;  $\text{CH}$   $\delta$  137.1, 135.8, 135.8, 129.8, 129.8, 129.6, 129.4, 128.6, 128.0, 127.9, 127.9, 114.0, 79.2, 75.3, 75.1, 72.9, 72.0, 72.0, 70.8, 69.9, 69.1,  $\text{C}$   $\delta$  207.4, 159.3, 144.4, 138.1, 134.1, 134.0, 131.3, 104.1, 44.4, 19.4, 18.3, 18.3; IR (neat) 2930, 2856, 1728, 1513, 1465, 1382, 1250, 1110, 835, 775, 738, 703,  $536\text{cm}^{-1}$ ; HRMS (ESI/ APCI) calcd for  $\text{C}_{75}\text{H}_{114}\text{O}_{12}\text{NaSi}_3$  ( $\text{M}+\text{Na}$ ) 1313.7516, found 1313.7560.

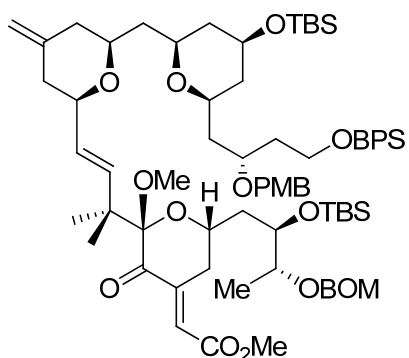

S18

**(((2*S*,4*S*,6*R*)-4-(*tert*-butyldimethylsilyloxy)-6-((*S*)-4-(*tert*-butyldiphenylsilyloxy)-2-(4-methoxybenzyloxy)butyl)tetrahydro-2*H*-pyran-2-yl)methyl)-4-methylenetetrahydro-2*H*-pyran-2-yl)-2-methylbut-3-en-2-yl)-2-methoxy-3-oxo-2*H*-pyran-4(3*H*,5*H*,6*H*)-ylidene)acetate (8):** To a stirring solution of ketone **7** (63.2 mg, 0.0489 mmol, 1.0 equiv.) in THF (0.98 mL, 0.05M) in a 10 mL rb flask at -78 °C was added a freshly prepared 0.25M solution of LDA in THF (0.587 mL, 0.147 mmol, 3.0 equiv.). The mixture was stirred at -78 °C for 30 min, then a 3.0 M solution of methyl glyoxylate in THF (0.489 mL, 1.47 mmol, 30 equiv) was added via syringe. The reaction mixture stirred at -78 °C for 30 min and was then quenched by addition of 1.0 mL of saturated aqueous NH<sub>4</sub>Cl solution. The mixture was allowed to warm to rt and was then partitioned between 5 mL of EtOAc and 5 mL of brine. The phases were separated and the aqueous phase was extracted with EtOAc (3 x 10 mL). The combined organic phases were dried over Na<sub>2</sub>SO<sub>4</sub>, filtered and concentrated under reduced pressure. Purification was accomplished by flash chromatography on a 4 x 11 cm column, eluting with 15% EtOAc/hexanes, collecting 18 x 150 mm test tube fractions. The product containing fractions (9-23) were combined and concentrated under reduced pressure to give a diastereomeric mixture of products (62.1 mg, 92% yield), which were carried into the next step.

To a stirring solution of the aforementioned product (62.1mg, 0.0450 mmol, 1.0 equiv) in pyridine (4.5 mL, 0.01 M) in a 25 mL rb flask with condenser was added DMAP (5.5 mg, 0.040 mmol, 1.0 equiv) and a solution of 0.5 M Ac<sub>2</sub>O in CH<sub>2</sub>Cl<sub>2</sub> (1.80 mL, 0.890 mmol, 20 equiv) by syringe. The reaction mixture was heated to 60 °C and stirred overnight. The solution was cooled to rt, then diluted with 10 mL of CH<sub>2</sub>Cl<sub>2</sub> and 5 mL of saturated

## Supporting Information

aqueous NaHCO<sub>3</sub> solution. The aqueous phase was separated and extracted with CH<sub>2</sub>Cl<sub>2</sub> (3 x 10 mL). The organic phases were combined, dried over Na<sub>2</sub>SO<sub>4</sub> and concentrated under reduced pressure. Purification was accomplished by flash chromatography on a 3 x 12 cm column, eluting with 10% EtOAc/hexanes, collecting 18 x 150 mm test tube fractions. The product containing fractions (4-9) were combined and concentrated under reduced pressure to give the product **8** (57.2 mg, 93% yield) as a colorless oil.  $R_f$  = 0.71 (20% EtOAc/Hexanes);  $[\alpha]_D^{20}$  = -16.1 (c=0.90, CHCl<sub>3</sub>); 500 MHz <sup>1</sup>H NMR (CDCl<sub>3</sub>)  $\delta$  7.72-7.67 (m, 4H), 7.45-7.28 (m, 11H), 7.19 (d,  $J$  = 8.1Hz, 2H), 6.86 (d,  $J$  = 7.7 Hz, 2H), 6.55 (t,  $J$  = 1.7 Hz, 1H), 5.82 (d,  $J$  = 15.8 Hz, 1H), 5.38 (dd,  $J$  = 16.1, 6.4Hz, 1H), 4.79 (dd,  $J$  = 11.1, 4.0 Hz, 2H), 4.65-4.60 (m, 4H), 4.55 (s, 1H), 4.47 (d,  $J$  = 10.4 Hz, 1H), 4.37 (d,  $J$  = 10.4 Hz, 1H), 4.11-4.05 (m, 2H), 3.95-3.89 (m, 1H), 3.86-3.77 (m, 5H), 3.77-3.71 (m, 4H), 3.71-3.65 (m, 1H), 3.59-3.50 (m, 2H), 3.50-3.43 (m, 1H), 3.32 (s, 3H), 2.86 (ddd,  $J$  = 15.8, 12.4, 3.0 Hz, 1H), 2.28 (d,  $J$  = 12.8 Hz, 1H), 2.09 (ddd,  $J$  = 10.1, 7.7, 2.4Hz, 1H), 2.04 (d,  $J$  = 13.8 Hz, 1H), 1.98 (ddd,  $J$  = 13.8, 8.1, 5.7 Hz, 1H), 1.90 (t,  $J$  = 11.1 Hz, 2H), 1.85-1.72 (m, 4H), 1.69-1.60 (m, 2H), 1.60-1.50 (m, 2H), 1.29-1.20 (m, 3H), 1.17 (d,  $J$  = 6.0 Hz, 3H), 1.11 (s, 3H), 1.07 (s, 9H), 1.04 (s, 3H), 0.90 (s, 9H), 0.86 (s, 9H), 0.08 (s, 3H), 0.07 (s, 3H), 0.07 (s, 3H), 0.03 (s, 3H); 125 MHz <sup>13</sup>C NMR (CDCl<sub>3</sub>)  $\delta$  197.5, 166.3, 159.3, 148.3, 144.2, 138.0, 136.1, 135.8, 134.1, 134.0, 131.2, 130.1, 129.8, 129.6, 128.6, 128.0, 128.0, 127.9, 123.2, 114.0, 109.0, 104.6, 93.5, 79.2, 75.3, 75.1, 72.9, 72.3, 72.0, 71.9, 71.0, 69.9, 69.6, 69.0, 60.5, 55.5, 52.4, 52.0, 44.8, 42.7, 42.5, 42.4, 42.0, 40.6, 40.3, 38.4, 37.9, 36.6, 27.2, 26.1, 26.0, 22.8, 21.4, 19.4, 18.3, 18.2, 13.9, -3.8, -4.3, -4.3, -4.5; 125 MHz DEPT <sup>13</sup>C NMR (CDCl<sub>3</sub>) CH<sub>3</sub>  $\delta$  55.5, 52.4, 52.0, 27.2, 26.1, 26.0, 22.8, 21.4, 13.9, -3.8, -4.3, -4.3, -4.5 ; CH<sub>2</sub>  $\delta$  109.0, 93.5, 72.3,

69.6, 60.5, 42.7, 42.5, 42.4, 42.0, 40.6, 40.3, 38.4, 37.9, 36.6; CH  $\delta$  136.1, 135.8, 130.1, 129.8, 129.6, 128.6, 128.0, 128.0, 127.9, 123.2, 114.0, 79.2, 75.3, 75.1, 72.9, 72.0, 71.9, 71.0, 69.9, 69.0; C  $\delta$  197.5, 166.3, 159.3, 148.3, 144.2, 138.0, 134.1, 134.0, 131.2, 104.6, 44.8, 19.4, 18.3, 18.2; IR (neat) 2934, 2857, 1724, 1513, 1466, 1381, 1250, 1111, 835, 775, 738, 703, 536  $\text{cm}^{-1}$ ; HRMS (ESI/ APCI) calcd for  $\text{C}_{78}\text{H}_{116}\text{O}_{14}\text{NaSi}_3$  (M+Na) 1383.7565, found 1383.7555.

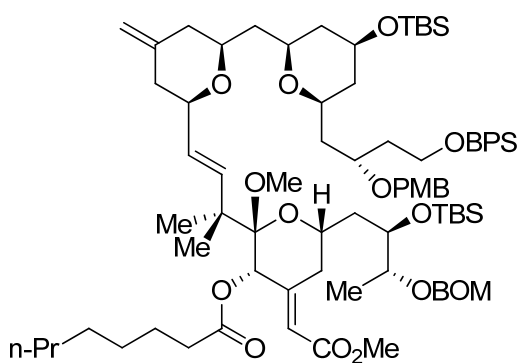

**Preparation of (2*S*,3*S*,6*S*,*E*)-6-((2*R*,3*R*)-3-(benzyloxymethoxy)-2-(*tert*-butyldimethylsilyloxy)butyl)-2-((*E*)-4-((2*R*,6*S*)-6-(((2*S*,4*S*,6*R*)-4-(*tert*-butyldimethylsilyloxy)-6-((*S*)-4-(*tert*-butyldiphenylsilyloxy)-2-(4-methoxybenzyloxy)butyl)tetrahydro-2*H*-pyran-2-yl)methyl)-4-methylene tetrahydro-2*H*-pyran-2-yl)-2-methylbut-3-en-2-yl)-2-ethoxy-4-(2-methoxy-2-oxoethylidene)tetrahydro-2*H*-pyran-3-yl octanoate (9):** To a stirring solution of

ketone **8** (14.1 mg, 0.0104 mmol, 1.0 equiv.) in MeOH (2.1 mL, 0.005M) in a 10 mL rb flask at rt was added  $\text{CeCl}_3 \cdot 7\text{H}_2\text{O}$  (77.5 mg, 0.208 mmol, 20 equiv). The reaction mixture was stirred at rt until all the  $\text{CeCl}_3 \cdot 7\text{H}_2\text{O}$  crystals dissolved. Then the reaction mixture was cooled to  $-40\text{ }^\circ\text{C}$  and kept for 15 min.  $\text{NaBH}_4$  (3.9 mg, 0.104 mmol, 10 equiv) was then added in one portion. The reaction continued at  $-40\text{ }^\circ\text{C}$  for 3 h. The mixture was diluted with 40% EtOAc/hexanes (10 mL), then quenched by the addition of saturated aqueous  $\text{NH}_4\text{Cl}$  solution (5.0 mL). The mixture was poured into a separatory

## Supporting Information

funnel with the aid of 50 mL of 40% EtOAc/hexanes. The organic phase was separated, then washed with 10 mL of H<sub>2</sub>O and 10 mL of brine, then dried over Na<sub>2</sub>SO<sub>4</sub> and concentrated under reduced pressure. The resulting crude product was used in the next step without further purification.

To a stirring solution of the previously described crude alcohol in CH<sub>2</sub>Cl<sub>2</sub> (1.1 mL, 0.01M) in a 10 mL rb flask at rt, was added pyridine (8.2 mg, 0.104 mmol, 10 equiv), DMAP (2.5 mg, 0.0208 mmol, 2.0 equiv), and octanoic anhydride (14.1 mg, 0.052 mmol, 5.0 equiv). The reaction mixture stirred at rt overnight, after which the solution was diluted with 10 mL of CH<sub>2</sub>Cl<sub>2</sub>. The mixture was poured into a separatory funnel containing 5 mL of saturated aqueous NaHCO<sub>3</sub> solution. The aqueous phase was separated and extracted with CH<sub>2</sub>Cl<sub>2</sub> (3 x 15 mL). The organic phases were combined, dried over Na<sub>2</sub>SO<sub>4</sub> and concentrated under reduced pressure. Purification was accomplished by flash chromatography on a 2 x 16 cm column, eluting with 8% EtOAc/hexanes, collecting 13 x 100 mm test tube fractions. The product containing fractions (9-15) were combined and concentrated under reduced pressure to give the product **9** (12.6 mg, 82% yield) as a colorless oil.  $R_f = 0.60$  (20% EtOAc/Hexanes);  $[\alpha]_D^{20} = +3.2$  (c=1.45, CHCl<sub>3</sub>); 500 MHz <sup>1</sup>H NMR (CDCl<sub>3</sub>)  $\delta$  7.69-7.65 (m, 4H), 7.44-7.34 (m, 11H), 7.17 (d,  $J = 8.8$  Hz, 2H), 6.86 (d,  $J = 8.3$  Hz, 2H), 5.93 (d,  $J = 16.1$  Hz), 5.88 (s, 1H), 5.57 (s, 1H), 5.43 (dd,  $J = 16.1, 5.9$  Hz, 1H), 4.80 (s, 2H), 4.64 (s, 3H), 4.55 (s, 1H), 4.44 (d,  $J = 10.8$  Hz, 1H), 4.36 (d,  $J = 10.3$  Hz, 1H), 4.12-4.06 (m, 2H), 3.92-3.86 (m, 1H), 3.84 (dd,  $J = 6.4, 4.4$  Hz, 1H), 3.81 (s, 3H), 3.80-3.70 (m, 3H), 3.79 (s, 3H), 3.57-3.44 (m, 4H), 3.30 (s, 3H), 2.35 (ddd,  $J = 7.3, 7.3, 1.5$  Hz, 2H), 2.29 (d,  $J = 13.2$  Hz, 1H), 2.17 (d,  $J = 12.7$  Hz, 1H), 2.03-1.95 (m, 3H), 1.90 (t,  $J = 12.2$  Hz, 1H), 1.85-1.72

(m, 4H), 1.65-1.52 (m, 7H), 1.33-1.28 (m, 10H), 1.17 (d,  $J = 6.4$  Hz, 3H), 1.11 (s, 3H), 1.11 (s, 3H), 1.04 (s, 9H), 0.92-0.85 (m, 21H), 0.08 (s, 3H), 0.06 (s, 3H), 0.06 (s, 3H), 0.05 (s, 3H); 125 MHz  $^{13}\text{C}$  NMR ( $\text{CDCl}_3$ )  $\delta$  172.3, 166.6, 159.4, 153.1, 144.4, 138.2, 138.0, 135.8, 135.8, 134.1, 134.1, 131.3, 129.8, 129.8, 129.5, 128.6, 128.0, 127.9, 127.8, 127.5, 117.0, 114.1, 109.0, 102.7, 93.3, 79.1, 75.2, 75.1, 73.0, 72.2, 72.0, 71.6, 70.4, 69.5, 69.1, 68.5, 60.6, 55.5, 51.6, 51.3, 46.1, 42.8, 42.5, 42.5, 42.1, 40.8, 40.4, 38.8, 38.0, 34.6, 33.6, 31.9, 29.3, 29.2, 27.2, 26.1, 25.0, 24.2, 24.2, 22.8, 19.4, 18.3, 18.3, 14.3, 14.0, -3.8, -4.2, -4.3, -4.4; 125 MHz DEPT  $^{13}\text{C}$  NMR ( $\text{CDCl}_3$ )  $\text{CH}_3$   $\delta$  55.5, 51.6, 51.3, 27.2, 26.1, 26.1, 24.2, 24.2, 14.3, 14.0, -3.8, -4.2, -4.3, -4.4;  $\text{CH}_2$   $\delta$  109.0, 93.3, 72.2, 69.5, 60.6, 42.8, 42.5, 42.5, 42.1, 40.8, 40.4, 38.8, 38.0, 34.6, 33.6, 31.9, 29.3, 29.2, 25.0, 22.8;  $\text{CH}$   $\delta$  138.0, 135.8, 135.8, 129.8, 129.5, 128.6, 128.0, 127.9, 127.5, 117.0, 114.0, 79.1, 75.2, 75.1, 73.0, 72.0, 71.6, 70.4, 69.1, 68.5;  $\text{C}$   $\delta$  172.3, 166.6, 159.4, 153.1, 144.4, 138.2, 134.1, 134.1, 131.3, 127.8, 102.7, 46.1, 19.4, 18.3, 18.3; IR (neat) 2931, 2857, 1722, 1513, 1465, 1381, 1251, 1154, 1111, 836, 775, 739, 702  $\text{cm}^{-1}$ ; HRMS (ESI/ APCI) calcd for  $\text{C}_{86}\text{H}_{132}\text{O}_{15}\text{NaSi}_3$  ( $\text{M}+\text{Na}$ ) 1511.8772, found 1511.8793.

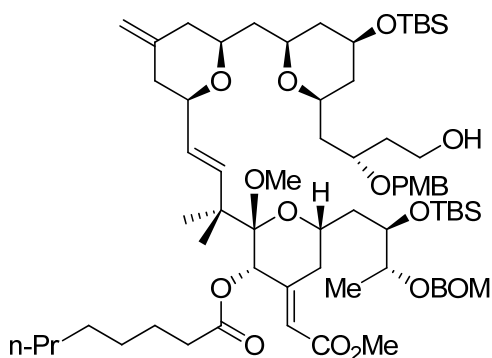

**Preparation of (2*S*,3*S*,6*S*,*E*)-6-((2*R*,3*R*)-3-(benzyloxymethoxy)-2-(*tert*-butyldimethylsilyloxy)butyl)-2-((*E*)-4-((2*R*,6*S*)-6-(((2*S*,4*S*,6*R*)-4-(*tert*-butyldimethylsilyloxy)-6-((*S*)-4-hydroxy-2-(4-methoxybenzyloxy)butyl)tetrahydro-2*H*-pyran-2-yl)methyl)-4-methylenetetrahydro-2*H*-**

**pyran-2-yl)-2-methylbut-3-en-2-yl)-2-methoxy-4-(2-methoxy-2-oxoethylidene)**

**tetrahydro-2H-pyran-3-yl octanoate (20):** To a stirring solution of TBDPS silyl ether **9** (11.0 mg, 0.00738 mmol, 1.0 equiv) in DMF (0.389 mL, 0.01 M) in a 4 mL reaction vial, was added a solution of 1.0 M TBAF solution in THF (7.4  $\mu$ L, 0.00738 mmol, 1.0 equiv) and a solution of 1.0 M AcOH solution in DMF (7.4  $\mu$ L, 0.00738 mmol, 1.0 equiv). The reaction was stirred at rt overnight, then diluted with 40% EtOAc/hexanes (5 mL) and quenched with water (5 mL). The phases were separated and the aqueous phase was extracted three times with 40% EtOAc/hexanes (5 mL). The combined organic phases were dried over Na<sub>2</sub>SO<sub>4</sub>, and concentrated under reduced pressure. Purification was accomplished using flash chromatography with a 2 x 13 cm silica gel column, eluting with 20% EtOAc/hexanes, collecting 13 x 100 mm test tube fractions. The product containing fractions (10-20) were combined and concentrated under reduced pressure to provide pure alcohol **20** (8.2 mg, 89%) as colorless oil.  $R_f$  = 0.44 ( 20% EtOAc/Hexanes);  $[\alpha]_D^{20}$  = +7.4 (  $c$ =0.575, CHCl<sub>3</sub>); 500 MHz <sup>1</sup>H NMR (CDCl<sub>3</sub>)  $\delta$  7.36-7.34 (m, 5H), 7.27 (d,  $J$  = 8.3 Hz), 6.89 (d,  $J$  = 8.3 Hz, 2H), 5.94 (d,  $J$  = 16.1 Hz, 1H), 5.89 (s, 1H), 5.57 (s, 1H), 5.42 (dd,  $J$  = 16.1, 5.9 Hz, 1H), 4.80 (s, 1H), 4.66 (s, 1H), 4.65 (s, 2H), 4.57 (s, 1H), 4.50 (d,  $J$  = 10.7 Hz, 1H), 4.45 (d,  $J$  = 10.7 Hz, 1H), 4.12-4.06 (m, 2H), 3.92-3.82 (m, 2H), 3.82-3.75 (m, 5H), 3.75-3.65 (m, 5H), 3.55-3.40 (m, 4H), 3.30 (s, 3H), 2.39-2.32 (m, 3H), 2.28 (d,  $J$  = 13.2 Hz, 1H), 2.18 (d,  $J$  = 13.2 Hz, 1H), 2.00 (q,  $J$  = 12.2 Hz, 2H), 1.95-1.86 (m, 3H), 1.84-1.66 (m, 4H), 1.66-1.50 (m, 6H), 1.38-1.20 (m, 8H), 1.22 (dd,  $J$  = 11.2, 6.3 Hz, 2H), 1.16 (d,  $J$  = 6.3 Hz, 3H), 1.12 (s, 6H), 0.90-0.84 (m, 21H), 0.08 (s, 3H), 0.06 (s, 3H). 0.06 (s, 6H); 125 MHz <sup>13</sup>C NMR (CDCl<sub>3</sub>)  $\delta$  172.4, 166.7, 159.6, 153.1, 144.5, 138.4, 138.1, 130.7, 129.7, 128.6, 128.0, 127.9, 127.3, 117.0, 114.2, 109.0, 102.6,



93.3, 79.4, 75.5, 75.2, 75.1, 72.5, 72.2, 72.2, 71.6, 70.3, 69.5, 68.9, 68.4, 60.4, 55.5, 51.6, 51.3, 46.1, 42.8, 42.5, 42.0, 41.7, 40.9, 40.4, 38.7, 36.9, 36.8, 34.6, 31.9, 29.3, 29.2, 26.1, 26.1, 25.0, 24.2, 24.1, 22.8, 18.3, 18.3, 14.3, 14.0, -3.8, -4.3, -4.4; 125 MHz DEPT  $^{13}\text{C}$  NMR ( $\text{CDCl}_3$ )  $\text{CH}_3$   $\delta$  55.5, 51.6, 51.3, 26.1, 26.1, 24.2, 24.1, 14.3, 14.0, -3.8, -4.3, -4.4 ;  $\text{CH}_2$   $\delta$  109.0, 93.3, 72.2, 69.5, 60.4, 42.8, 42.5, 42.0, 41.7, 40.9, 40.4, 38.7, 36.9, 36.8, 34.6, 31.9, 29.3, 29.2, 25.0, 22.8;  $\text{CH}$   $\delta$  138.4, 129.7, 128.6, 128.0, 127.9, 127.3, 117.0, 114.2, 79.4, 75.5, 75.2, 75.1, 72.5, 72.2, 71.6, 70.3, 68.9, 68.4;  $\text{C}$   $\delta$  172.4, 166.7, 159.6, 153.1, 144.5, 138.1, 130.7, 102.6, 46.1, 18.3, 18.3; IR (neat) 2930, 2857, 1722, 1514, 1463, 1380, 1250, 1155, 1044, 836, 775  $\text{cm}^{-1}$ ; HRMS (ESI/ APCI) calcd for  $\text{C}_{70}\text{H}_{114}\text{O}_{15}\text{NaSi}_2$  ( $\text{M}+\text{Na}$ ) 1273.7594, found 1273.7595.

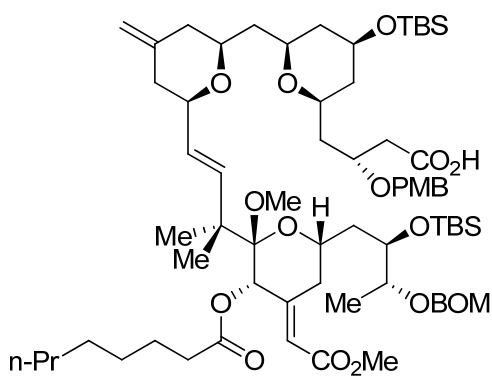

**Preparation of (*R*)-4-((2*R*,4*S*,6*S*)-6-(((2*S*,6*R*)-6-((*E*)-3-((2*S*,3*S*,6*S*,*E*)-6-((2*R*,3*R*)-3-(benzyloxymethoxy)-2-(*tert*-butyldimethylsilyloxy)butyl)-2-methoxy-4-(2-methoxy-2-oxoethylidene)-3-(octanoyloxy)tetrahydro-2*H*-pyran-2-yl)-3-methylbut-1-enyl)-4-methylenetetrahydro-2*H*-pyran-2-yl)methyl)-4-(*tert*-butyldimethylsilyloxy) tetrahydro-2*H*-pyran-2-yl)-3-(4-methoxybenzyloxy)butanoic acid (10):** To a stirring solution of alcohol **20** (7.1 mg, 0.0057 mmol, 1.0 equiv) in  $\text{CH}_2\text{Cl}_2$  (570  $\mu\text{L}$ ), in a 4 mL reaction vial at 0  $^\circ\text{C}$ , was added diisopropylethylamine (21  $\mu\text{L}$ , 0.119 mmol, 21.0 equiv) and DMSO (12  $\mu\text{L}$ , 0.171 mmol, 30.0 equiv). The

## Supporting Information

solution stirred at 0 °C for 5 min and SO<sub>3</sub>·Py (5.4 mg, 0.0340 mmol, 6.0 equiv) was added in one portion. Stirring continued at 0 °C for 1.25 h, after which the reaction mixture was diluted with CH<sub>2</sub>Cl<sub>2</sub> (1 mL) and quenched by the addition of saturated aqueous NaHCO<sub>3</sub> solution (1 mL). The mixture stirred at room temperature for 10 min until effervescence was complete. The reaction mixture was partitioned between CH<sub>2</sub>Cl<sub>2</sub> (5 mL) and saturated aqueous NaHCO<sub>3</sub> solution (5 mL) and the phases were separated. The aqueous phase was extracted with CH<sub>2</sub>Cl<sub>2</sub> (3 x 5 mL), and the combined organic phases were dried over Na<sub>2</sub>SO<sub>4</sub>, filtered, and concentrated under reduced pressure. The resulting residue was washed through a small plug of silica gel with 20 % EtOAc/hexanes (30 mL), and the solvent was removed under reduced pressure to provide the aldehyde, which was used in the next step without further purification.

To a stirring solution of the aforementioned aldehyde (7.1 mg, 0.0057 mmol, 1.0 equiv) in 2-methyl-2-butene (570 µL) and *t*-BuOH (570 µL), in a 4 mL reaction vial at rt, was added a 1.25 M aqueous solution of KH<sub>2</sub>PO<sub>4</sub> (109 µL). The mixture was cooled to -10 °C, and NaClO<sub>2</sub> (80% Aldrich, 13 mg, 0.114 mmol, 20.0 equiv) was added in one portion. The reaction mixture stirred vigorously at -10 °C for 4 h, and was then quenched with aqueous pH 4 buffer solution (1 mL). The reaction mixture was partitioned between CH<sub>2</sub>Cl<sub>2</sub> (5 mL) and aqueous pH 4 buffer solution (5 mL). The phases were separated, and the aqueous phase was extracted with CH<sub>2</sub>Cl<sub>2</sub> (4 x 5 mL). The combined organic phases were dried over Na<sub>2</sub>SO<sub>4</sub>, and concentrated under reduced pressure. Purification was accomplished using flash chromatography with a 0.8 x 6.5 cm silica gel column, eluting with 20 % EtOAc/hexanes then 1 % MeOH / 30 % EtOAc/ hexanes, collecting 6 x 50 mm test tube fractions. The product containing fractions (10-21) were combined

## Supporting Information

and concentrated under reduced pressure to provide pure carboxylic acid **10** (8.0 mg, quant. yield over 2 steps) as a colorless oil:  $R_f = 0.38$  (50% EtOAc/Hexanes);  $[\alpha]_D^{20} = +12$  (  $c = 0.27$ ,  $\text{CHCl}_3$ ); 500 MHz  $^1\text{H}$  NMR ( $\text{CDCl}_3$ )  $\delta$  7.38-7.28 (m, 5H), 7.36 (d,  $J = 8.4$  Hz, 2H), 6.88 (d,  $J = 8.4$  Hz, 2H), 5.96 (d,  $J = 5.8$  Hz, 1H), 5.88 (s, 1H), 5.59 (s, 1H), 5.44 (dd,  $J = 15.8, 6.1$  Hz, 1H), 4.82 (dd,  $J = 10.1, 7.1$  Hz, 2H), 4.66 (s, 2H), 4.60 (s, 1H), 4.57 (d,  $J = 10.7$  Hz, 1H), 4.45 (d,  $J = 10.8$  Hz, 1H), 4.14-4.05 (m, 3H), 3.87 (ddd,  $J = 12.4, 6.4, 6.4$  Hz, 1H), 3.81 (s, 3H), 3.77 (t,  $J = 5.0$  Hz, 1H), 3.75-3.68 (m, 4H), 3.57-3.40 (m, 4H), 3.31 (s, 3H), 2.61 (dddd,  $J = 15.4, 15.4, 15.4, 5.4$  Hz, 2H), 2.40-2.31 (m, 3H), 2.28 (d,  $J = 13.1$  Hz, 1H), 2.17 (d,  $J = 12.4$  Hz, 1H), 2.08-1.88 (m, 5H), 1.84-1.72 (m, 3H), 1.70-1.52 (m, 5H), 1.35-1.25 (m, 8H), 1.24 (dd,  $J = 11.8, 4.0$  Hz, 2H), 1.17 (d,  $J = 6.4$  Hz, 3H), 1.12 (s, 6H), 0.90-0.86 (m, 21H), 0.09 (s, 3H), 0.08 (s, 3H), 0.06 (s, 6H); 125 MHz  $^{13}\text{C}$  NMR ( $\text{CDCl}_3$ )  $\delta$  173.2, 172.5, 166.8, 159.6, 153.2, 144.3, 138.8, 137.9, 130.3, 129.7, 128.6, 128.1, 127.9, 127.2, 116.9, 114.2, 109.1, 102.6, 93.1, 79.6, 75.3, 75.1, 73.3, 72.5, 72.2, 72.1, 71.6, 70.1, 69.5, 68.8, 68.4, 55.5, 51.6, 51.4, 46.1, 42.8, 42.2, 42.0, 42.0, 40.8, 40.4, 40.0, 38.7, 34.6, 33.6, 31.9, 29.3, 29.2, 26.1, 26.1, 25.0, 24.4, 24.0, 22.8, 18.3, 14.3, 14.0, -3.8, -4.3, -4.5; 125 MHz DEPT  $^{13}\text{C}$  NMR ( $\text{CDCl}_3$ )  $\text{CH}_3$   $\delta$  55.5, 51.6, 51.4, 26.1, 26.1, 24.4, 24.0, 14.3, 14.0, -3.8, -4.3, -4.5 ;  $\text{CH}_2$   $\delta$  109.1, 93.1, 72.5, 69.5, 42.8, 42.2, 42.0, 42.0, 40.8, 40.4, 40.0, 38.7, 34.6, 33.6, 31.9, 29.3, 29.2, 25.0, 22.8;  $\text{CH}$   $\delta$  138.8, 129.7, 128.6, 128.1, 127.9, 127.2, 116.9, 114.1, 79.6, 75.3, 75.1, 73.3, 72.2, 72.1, 71.6, 70.1, 68.8, 68.4;  $\text{C}$   $\delta$  173.2, 172.5, 166.8, 159.6, 153.2, 144.3, 137.9, 130.3, 102.6, 46.1, 18.3; IR (neat) 2930, 2857, 1722, 1514, 1463, 1380, 1250, 1156, 1111, 836, 775, 542  $\text{cm}^{-1}$  ; HRMS (ESI/ APCI) calcd for  $\text{C}_{70}\text{H}_{112}\text{O}_{16}\text{NaSi}_2$  ( $\text{M}+\text{Na}$ ) 1287.7381, found 1287.7361.

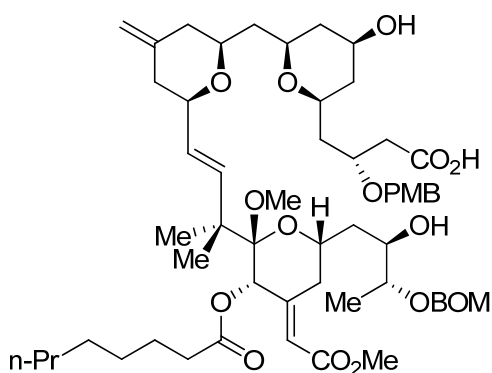

**Preparation of (R)-4-((2S,4S,6R)-6-(((2S,6R)-6-**

**((E)-3-((2S,3S,6S,E)-6-((2R,3R)-3-(benzyloxymethoxy)-2-hydroxybutyl)-2-methoxy-**

**4-(2-methoxy-2-oxoethylidene)-3-(octanoyloxy)tetrahydro-2H-pyran-2-yl)-3-**

**methylbut-1-enyl)-4-methylenetetrahydro-2H-pyran-2-yl)methyl)-4-hydroxy**

**tetrahydro-2H-pyran-2-yl)-3-(4-methoxybenzyloxy)butanoic acid (21):** To a stirring

solution of TBS ether **10** (7.6 mg, 0.0060 mmol, 1.0 equiv) in 9:1 THF/ pyridine (600  $\mu$ L,

0.01 M) in a 4 mL plastic vial was added HF $\cdot$ Py (20 %, 240  $\mu$ L). The solution was stirred

at rt for 48 h, then diluted with 50 % EtOAc/hexanes (50 mL), and washed with brine (2

x 10 mL). The solution was dried over Na<sub>2</sub>SO<sub>4</sub>, and concentrated under reduced pressure.

Purification was accomplished using flash column chromatography with a 2 x 14 cm

silica gel column, eluting with 10% MeOH/40% EtOAc/hexanes, collecting 10 x 130 mm

test tube fractions. The product containing fractions (6-8) were combined and

concentrated under reduced pressure to provide pure product **21** (5.4 mg, 87%) as a

colorless oil.  $R_f$  = 0.48 (MeOH/EtOAc/Hexanes = 10:40:50);  $[\alpha]_D^{20}$  = +6 ( c=0.20,

CHCl<sub>3</sub>); 500 MHz <sup>1</sup>H NMR (CDCl<sub>3</sub>)  $\delta$  7.37-7.29 (m, 5H), 7.25 (d,  $J$  = 8.8 Hz, 2H), 6.88

(d,  $J$  = 8.8 Hz, 2H), 6.00 (d,  $J$  = 16.1 Hz, 1H), 5.87 (s, 1H), 5.54 (s, 1H), 5.40 (dd,  $J$  =

16.1, 6.4 Hz, 1H), 4.89 (d,  $J$  = 7.3 Hz, 1H), 4.84 (d,  $J$  = 7.3 Hz, 1H), 4.70 (s, 2H), 4.66 (d,

$J$  = 2.9 Hz, 2H), 4.57 (d,  $J$  = 10.7 Hz, 1H), 4.46 (d,  $J$  = 10.7 Hz, 1H), 4.22-4.16 (m, 1H),

4.14-4.06 (m, 2H), 3.86 (m, 1H), 3.80 (s, 3H), 3.78-3.72 (m, 1H), 3.70-3.62 (m, 5H),

3.52-3.40 (m, 4H), 3.33 (s, 3H), 2.61 (dddd,  $J = 15.6, 15.6, 15.6, 5.9$  Hz, 2H), 2.40-2.32 (m, 3H), 2.22 (t,  $J = 14.6$  Hz, 3H), 2.05-1.85 (m, 5H), 1.80-1.55 (m, 7H), 1.34-1.24 (m, 10H), 1.18-1.08 (m, 9H), 0.90-0.87 (m, 3H); 125 MHz  $^{13}\text{C}$  NMR ( $\text{CDCl}_3$ )  $\delta$  173.5, 172.3, 166.9, 159.6, 153.2, 144.4, 139.7, 137.7, 130.2, 129.7, 128.7, 128.1, 128.1, 127.0, 116.8, 114.2, 109.1, 102.9, 93.9, 80.0, 77.9, 75.1, 72.9, 72.5, 72.2, 72.2, 71.3, 70.1, 68.2, 68.2, 60.6, 55.5, 51.5, 51.4, 46.2, 42.2, 41.8, 41.5, 41.1, 40.8, 40.8, 39.9, 34.7, 31.9, 29.9, 29.3, 29.1, 25.0, 24.9, 23.0, 22.8, 17.0, 14.3; 125 MHz DEPT  $^{13}\text{C}$  NMR ( $\text{CDCl}_3$ )  $\text{CH}_3$   $\delta$  55.5, 51.5, 51.4, 25.0, 23.0, 17.0, 14.3;  $\text{CH}_2$   $\delta$  109.1, 93.9, 72.2, 70.1, 42.2, 41.8, 41.5, 41.1, 40.8, 40.8, 39.9, 34.7, 31.9, 29.9, 29.3, 29.1, 24.9, 24.9, 22.8;  $\text{CH}$   $\delta$  139.7, 129.7, 128.7, 128.1, 128.1, 127.0, 116.8, 114.2, 80.0, 77.9, 75.1, 72.9, 72.5, 72.2, 72.2, 71.3, 68.2, 68.2;  $\text{C}$   $\delta$  173.5, 172.3, 166.9, 159.6, 153.3, 144.4, 137.7, 130.2, 102.9, 46.2; IR (neat) 3426, 2930, 1719, 1514, 1458, 1379, 1247, 1156, 1105, 1038, 745  $\text{cm}^{-1}$ ; HRMS (ESI/ APCI) calcd  $\text{C}_{58}\text{H}_{84}\text{O}_{16}\text{Na}$  for ( $\text{M}+\text{Na}$ ) 1059.5657, found 1059.5675.

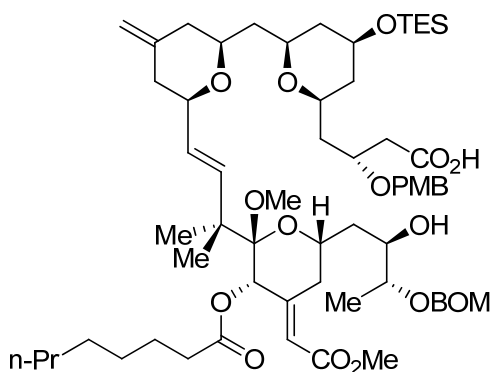

**Preparation of (*R*)-4-((2*R*,4*S*,6*S*)-6-(((2*S*,6*R*)-6-((*E*)-3-((2*S*,3*S*,6*S*,*E*)-6-((2*R*,3*R*)-3-(benzyloxymethoxy)-2-hydroxybutyl)-2-methoxy-4-(2-methoxy-2-oxoethylidene)-3-(octanoyloxy)tetrahydro-2H-pyran-2-yl)-3-methylbut-1-enyl)-4-methylenetetrahydro-2H-pyran-2-yl)methyl)-4-(triethylsilyloxy)tetrahydro-2H-pyran-2-yl)-3-(4-methoxybenzyloxy)butanoic acid (**11**):** To a stirring solution of alcohol **21** (3.0 mg, 0.0029 mmol, 1.0 equiv) in  $\text{CH}_2\text{Cl}_2$  (116  $\mu\text{L}$ ,

## Supporting Information

0.025 M) in a 4 mL reaction vial at rt was added DMAP (1.6 mg, 0.013 mmol, 4.5 equiv). The reaction was cooled to -15 °C, then a 1.0 M solution of TESCl in CH<sub>2</sub>Cl<sub>2</sub> (6.1 µL, 0.0061 mmol, 2.1 equiv) was added by syringe. Stirring was continued for 90 min. The reaction was then quenched by addition of 1 mL of saturated aqueous NaHCO<sub>3</sub> solution, and the mixture was partitioned between 10 mL of EtOAc and 5 mL of saturated aqueous NaHCO<sub>3</sub> solution. The aqueous phase was separated and extracted with EtOAc (3 x 10 mL). The combined organic phases were dried over Na<sub>2</sub>SO<sub>4</sub> and concentrated under reduced pressure. Purification was accomplished using flash chromatography with a 0.6 x 4 cm silica gel column, eluting with 5% MeOH/35% EtOAc/hexanes, collecting 6 x 50 mm test tube fractions. The product containing fractions (11-25) were combined and concentrated under reduced pressure to provide pure product **11** (2.5 mg, 76%) as a colorless oil.  $R_f = 0.63$  (MeOH/EtOAc/Hexanes = 5:35:60 );  $[\alpha]_D^{20} = +5$  (  $c=0.085$ , CHCl<sub>3</sub>); 500 MHz <sup>1</sup>H NMR (CDCl<sub>3</sub>)  $\delta$  7.37-7.30 (m, 5H), 7.26 (d,  $J = 8.8$  Hz, 2H), 6.89 (d,  $J = 8.8$  Hz, 2H), 5.98 (d,  $J = 15.6$  Hz, 1H), 5.88 (s, 1H), 5.56 (s, 1H), 5.42 (dd,  $J = 16.1, 6.3$  Hz, 1H), 4.90 (d,  $J = 6.8$  Hz, 1H), 4.85 (d,  $J = 6.8$  Hz, 1H), 4.70-4.60 (m, 4H), 4.57 (d,  $J = 10.7$  Hz, 1H), 4.47 (d,  $J = 10.7$  Hz, 1H), 4.26-4.18 (m, 1H), 4.15-4.05 (m, 1H), 3.90-3.85 (m, 1H), 3.81 (s, 3H), 3.74-3.62 (m, 6H), 3.56-3.40 (m, 4H), 3.34 (s, 3H), 2.62 (dddd,  $J = 15.6, 15.6, 15.6, 5.4$  Hz, 2H), 2.35 (ddd,  $J = 7.3, 7.3, 2.9$  Hz, 3H), 2.28 (d,  $J = 13.2$  Hz, 1H), 2.20 (d,  $J = 12.2$  Hz, 1H), 2.10-2.00 (m, 2H), 2.00-1.88 (m, 3H), 1.86-1.80 (m, 1H), 1.80-1.55 (m, 7H), 1.34-1.22 (m, 10H), 1.12 (s, 6H), 0.95 (t,  $J = 7.8$  Hz, 9H), 0.88 (m, 6H), 0.60 (q,  $J = 7.8$  Hz, 6H); 125 MHz <sup>13</sup>C NMR (CDCl<sub>3</sub>)  $\delta$  174.0, 172.3, 166.8, 159.5, 153.2, 144.3, 139.2, 139.2, 137.7, 129.6, 128.7, 128.1, 128.1, 126.9, 116.8, 114.1, 109.1, 102.8, 93.9, 79.7, 78.0, 77.4, 75.7, 73.6, 72.4, 72.2, 72.1, 71.1, 70.1, 68.6,

## Supporting Information

68.2, 55.5, 51.4, 51.4, 46.2, 42.9, 42.3, 42.1, 40.8, 40.7, 39.8, 34.6, 31.9, 31.8, 29.9, 29.3, 29.2, 25.0, 24.6, 23.6, 22.9, 22.8, 17.0, 14.4, 7.1, 5.2; 125 MHz DEPT  $^{13}\text{C}$  NMR ( $\text{CDCl}_3$ )  $\text{CH}_3$   $\delta$  55.5, 51.4, 51.4, 24.6, 23.6, 17.0, 14.4, 7.1;  $\text{CH}_2$   $\delta$  109.1, 93.9, 72.4, 70.1, 42.9, 42.3, 42.1, 40.8, 40.7, 39.8, 34.6, 31.9, 29.9, 29.3, 29.2, 25.0, 23.6, 22.9, 22.8, 5.2;  $\text{CH}$   $\delta$  139.2, 139.2, 129.6, 128.7, 128.1, 128.1, 126.9, 114.1, 79.7, 78.0, 75.7, 73.6, 72.4, 72.2, 72.1, 71.1, 68.6, 68.2;  $\text{C}$   $\delta$  174.0, 172.3, 166.8, 159.5, 153.2, 144.3, 137.7, 116.8, 102.8, 46.2; IR (neat) 2930, 1719, 1513, 1459, 1380, 1247, 1154, 1040, 822, 742  $\text{cm}^{-1}$ ; HRMS (ESI/ APCI) calcd for  $\text{C}_{64}\text{H}_{98}\text{O}_{16}\text{NaSi}$  ( $\text{M}+\text{Na}$ ) 1173.6522, found 1173.6545.

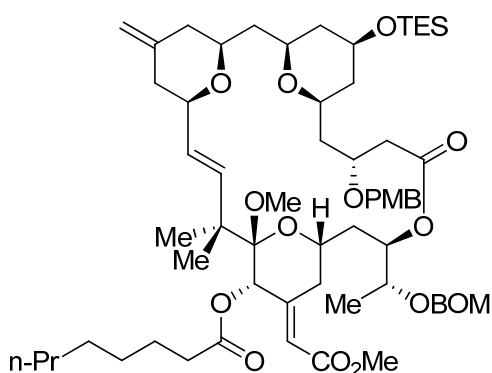

### Preparation of macrolactone (12):

To a stirring solution of seco-acid **11** (2.0 mg, 0.0017 mmol, 1.0 equiv) in THF (58  $\mu\text{L}$ , 0.03 M) at 0  $^{\circ}\text{C}$  in a 4 mL reaction vial was added triethylamine (1.1 mg, 0.010 mmol, 6.0 equiv) and 2,4,6-trichlorobenzoyl chloride (1.3 mg, 0.0052 mmol, 3.0 equiv) by syringe. The reaction was stirred at 0  $^{\circ}\text{C}$  for 5 min, then warmed to rt and stirred for 2 h. The reaction mixture was diluted with 1:3 THF/toluene (696  $\mu\text{L}$ , 0.0025 M), and taken up into a 1.0 mL gas-tight syringe. The resulting solution was added into a stirring solution of DMAP (4.3 mg, 0.035 mmol, 20 equiv) in toluene (1.2 mL, 0.0015 M) at 40  $^{\circ}\text{C}$  over 12 h by a syringe pump. The vial was rinsed with toluene (0.2 mL) and the rinsing solution was added into reaction by syringe pump over 2 h. The reaction was cooled to rt, and diluted with 50 mL of 40% EtOAc/Hexanes. The solution was washed with 5 mL of saturated

## Supporting Information

aqueous NaHCO<sub>3</sub> solution and 5 mL of brine. The organic phase was dried over Na<sub>2</sub>SO<sub>4</sub>, filtered, and concentrated under reduced pressure. Purification was accomplished using flash column chromatography with a 1.6 x 10 cm silica gel column, eluting with 20% EtOAc/hexanes, collecting 12 x 75 mm test tube fractions. The product containing fractions (7-10) were combined and concentrated under reduced pressure to provide pure product **12** (1.8 mg, 91%) as a colorless oil.  $R_f = 0.45$  (20% EtOAc/Hexanes);  $[\alpha]_D^{20} = +21$  (c = 0.075, CHCl<sub>3</sub>); 500 MHz <sup>1</sup>H NMR (CDCl<sub>3</sub>) 7.40-7.28 (m, 5H), 7.22 (d,  $J = 8.3$  Hz, 2H), 6.82 (d,  $J = 8.8$  Hz, 2H), 6.22 (d,  $J = 6.1$  Hz, 1H), 5.95 (s, 1H), 5.57 (ddd,  $J = 12.2, 4.0, 2.4$  Hz, 1H), 5.34 (dd,  $J = 15.6, 8.3$  Hz, 1H), 5.15 (s, 1H), 4.82 (dd,  $J = 12.2, 5.8$  Hz, 2H), 4.66 (d,  $J = 11.7$  Hz, 1H), 4.62 (d,  $J = 11.7$  Hz, 1H), 4.51 (s, 2H), 4.17 (m, 1H), 3.95 (m, 2H), 3.75 (s, 3H), 3.73-3.66 (m, 5H), 3.50 (m, 1H), 3.35 (t,  $J = 11.7$  Hz, 1H), 3.15-3.05 (m, 4H), 3.08 (s, 3H), 2.54 (d,  $J = 15.6$  Hz, 1H), 2.46 (dd,  $J = 15.6, 9.8$  Hz, 1H), 2.32-2.26 (m, 3H), 2.20 (d,  $J = 12.7$  Hz, 1H), 2.15-2.03 (m, 4H), 1.99 (d,  $J = 12.2$  Hz, 1H), 1.94 (d,  $J = 12.7$  Hz, 1H), 1.85 (t,  $J = 13.2$  Hz, 1H), 1.83-1.67 (m, 3H), 1.64-1.55 (m, 2H), 1.52 (dd,  $J = 13.7, 7.3$  Hz, 1H), 1.46-1.38 (m, 1H), 1.30-1.22 (m, 10H), 1.09 (s, 3H), 1.08 (s, 3H), 1.06 (d,  $J = 6.4$  Hz, 3H), 0.95 (t,  $J = 7.8$  Hz, 9H), 0.88 (t,  $J = 7.4$  Hz, 3H), 0.58 (q,  $J = 7.8$  Hz, 6H); 125 MHz <sup>13</sup>C NMR (CDCl<sub>3</sub>)  $\delta$  172.3, 172.2, 167.0, 159.3, 151.5, 144.7, 141.8, 138.1, 131.1, 129.6, 128.6, 128.1, 127.8, 125.7, 119.4, 113.9, 108.9, 103.4, 93.7, 81.5, 76.5, 75.3, 73.8, 73.7, 73.4, 73.2, 72.2, 70.7, 69.8, 68.6, 67.3, 55.5, 52.8, 51.4, 45.3, 44.2, 43.0, 42.2, 42.1, 42.1, 41.5, 41.0, 34.8, 31.9, 31.1, 30.0, 29.2, 29.1, 26.4, 24.9, 22.8, 20.2, 15.3, 14.3, 7.1, 5.1; 125 MHz DEPT <sup>13</sup>C NMR (CDCl<sub>3</sub>) CH<sub>3</sub>  $\delta$  55.5, 52.8, 51.4, 26.4, 20.2, 15.3, 14.3, 7.1; CH<sub>2</sub>  $\delta$  108.9, 93.7, 72.2, 69.8, 44.2, 43.0, 42.2, 42.1, 42.1, 41.5, 41.0, 34.8, 31.9, 31.1, 30.0, 29.2, 29.1, 24.9, 22.8, 5.1; CH  $\delta$



141.8, 129.6, 128.6, 128.1, 127.8, 125.7, 119.4, 113.9, 81.5, 76.5, 75.3, 73.8, 73.7, 73.4, 73.2, 70.7, 68.6, 67.3 ; C  $\delta$  172.3, 172.2, 167.0, 159.3, 151.5, 144.7, 138.1, 131.1, 103.4, 45.3; IR (neat) 2930, 1725, 1513, 1459, 1377, 1246, 1156, 1088, 1044, 824, 742, 644, 590, 535  $\text{cm}^{-1}$ ; HRMS (ESI/ APCI) calcd for  $\text{C}_{64}\text{H}_{96}\text{O}_{15}\text{NaSi}$  ( $\text{M}+\text{Na}$ ) 1155.6416, found 1155.6415.

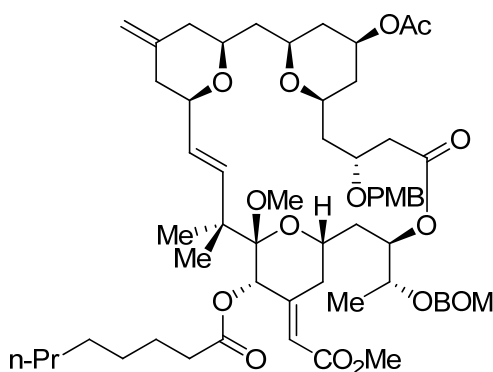

**Preparation of Protected Analogue (13):** To a stirring solution of TES ether **12** (2.0 mg, 0.0018 mmol, 1.0 equiv) in 9:1 THF/ pyridine (272  $\mu\text{L}$ , 0.0067 M) in a 4 mL plastic vial was added HF $\cdot$ Py (20 %, 108  $\mu\text{L}$ ). The solution was stirred at rt for 48 h, then diluted with 50 % EtOAc/hexanes (50 mL), and washed with brine (3 x 5 mL). The solution was dried over  $\text{Na}_2\text{SO}_4$ , filtered, and concentrated under reduced pressure. The resulting crude product was carried into the next step without further purification.

To a stirring solution of the aforementioned alcohol in  $\text{CH}_2\text{Cl}_2$  (352  $\mu\text{L}$ , 0.005 M) in a 4 mL reaction vial at rt was added pyridine (7.0 mg, 0.088 mmol, 50 equiv), DMAP (2.2 mg, 0.018 mmol) and  $\text{Ac}_2\text{O}$  (5.4 mg, 0.053 mmol, 30 equiv). The mixture was stirred at rt overnight, then diluted with 1 mL of  $\text{CH}_2\text{Cl}_2$  and quenched with 1 mL of saturated aqueous  $\text{NaHCO}_3$  solution. The mixture was then partitioned between 10 mL of  $\text{CH}_2\text{Cl}_2$  and 5 mL of saturated aqueous  $\text{NaHCO}_3$  solution. The aqueous phase was separated and extracted with  $\text{CH}_2\text{Cl}_2$  (3 x 10 mL). The combined organic phases were dried over

## Supporting Information

Na<sub>2</sub>SO<sub>4</sub>, filtered, and concentrated under reduced pressure. Purification was accomplished using flash chromatography with a 1 x 9 cm silica gel column, eluting with 50% EtOAc/hexanes, collecting 12 x 75 mm test tube fractions. The product containing fractions (4-7) were combined and concentrated under reduced pressure to provide pure product **13** (1.8 mg, 95% over 2 steps) as a colorless oil:  $R_f = 0.45$  (50% EtOAc/Hexanes);  $[\alpha]_D^{20} = +13$  (c = 0.080, CHCl<sub>3</sub>); 500 MHz <sup>1</sup>H NMR (CDCl<sub>3</sub>) δ 7.39-7.28 (m, 5H), 7.21 (d, *J* = 8.8 Hz, 2H), 6.83 (d, *J* = 8.8 Hz, 2H), 6.22 (d, *J* = 15.6 Hz, 1H), 5.95 (d, *J* = 1.5 Hz, 1H), 5.58 (ddd, *J* = 11.7, 4.4, 2.4 Hz, 1H), 5.34 (dd, *J* = 15.6, 8.8 Hz, 1H), 5.18 (s, 1H), 4.86-4.80 (m, 3H), 4.77 (d, *J* = 7.3 Hz, 2H), 4.66 (d, *J* = 11.7 Hz, 1H), 4.62 (d, *J* = 11.7 Hz, 1H), 4.51 (d, *J* = 10.7 Hz, 1H), 4.47 (d, *J* = 10.7 Hz, 1H), 4.22-4.16 (m, 1H), 3.99-3.92 (m, 2H), 3.76 (s, 3H), 3.73-3.66 (m, 5H), 3.52-3.40 (m, 2H), 3.18 (t, *J* = 10.7 Hz, 1H), 3.08 (s, 3H), 2.52 (dd, *J* = 11.6, 3.4 Hz, 1H), 2.47 (dd, *J* = 15.6, 9.3 Hz, 1H), 2.32-2.26 (m, 3H), 2.20 (d, *J* = 13.2 Hz, 1H), 2.13-2.07 (m, 2H), 2.05 (s, 3H), 1.99 (d, *J* = 14.7 Hz, 1H), 1.94 (d, *J* = 11.7 Hz, 1H), 1.64-1.50 (m, 3H), 1.46-1.38 (m, 1H), 1.34-1.22 (m, 10H), 1.09 (s, 6H), 1.07 (s, 3H), 0.88 (t, *J* = 6.8 Hz, 3H); 125 MHz <sup>13</sup>C NMR (CDCl<sub>3</sub>) δ 172.2, 171.3, 170.7, 167.0, 159.3, 151.5, 144.4, 141.7, 138.1, 130.9, 129.6, 128.6, 128.1, 127.9, 125.7, 119.4, 113.9, 109.1, 103.4, 93.7, 81.5, 76.3, 74.8, 73.7, 73.5, 73.3, 73.2, 72.3, 70.8, 70.4, 69.8, 67.3, 55.5, 52.8, 51.4, 45.2, 44.0, 42.9, 41.9, 41.4, 41.0, 37.6, 34.8, 34.8, 31.9, 31.0, 29.9, 29.2, 29.1, 26.5, 24.9, 22.8, 21.5, 20.2, 15.3, 14.3; 125 MHz DEPT <sup>13</sup>C NMR (CDCl<sub>3</sub>) CH<sub>3</sub> δ 55.5, 52.8, 51.4, 26.5, 21.5, 20.2, 15.3, 14.3; CH<sub>2</sub> δ 109.1, 93.7, 72.3, 69.8, 44.0, 42.9, 41.9, 41.4, 41.0, 37.6, 34.8, 34.8, 31.9, 31.0, 29.9, 29.2, 29.1, 24.9, 22.8; CH δ 141.7, 129.6, 128.6, 128.1, 127.9, 125.7, 119.4, 113.9, 81.5, 76.3, 74.8, 73.7, 73.5, 73.3, 73.2, 70.8, 70.4, 67.3; C δ 172.2, 171.3,

## Supporting Information

170.7, 167.0, 159.3, 151.5, 144.4, 138.1, 130.9, 103.4, 45.2; IR (neat) 2929, 2856, 1665, 1613, 1514, 1436, 1377, 1309, 1243, 1158, 1091, 1040, 892, 815, 753, 699, 536  $\text{cm}^{-1}$ ; HRMS (ESI/ APCI) calcd for  $\text{C}_{60}\text{H}_{84}\text{O}_{16}\text{Na}$  ( $\text{M}+\text{Na}$ ) 1083.5657, found 1083.5643.

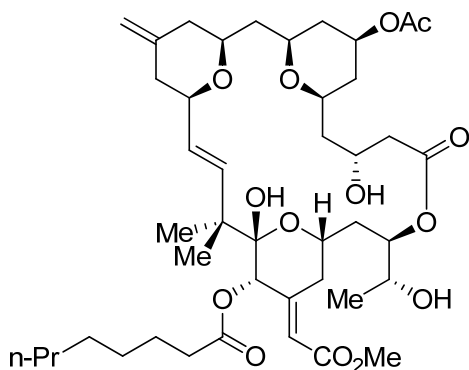

### Preparation of MERLE 27

To a stirring solution of **13** (1.4 mg, 0.0013 mmol, 1.0 equiv) in  $\text{CH}_2\text{Cl}_2$  (0.26 mL, 0.005 M) in a 4 mL reaction vial at 0 °C was added aqueous pH 7 buffer (0.15 mL) and DDQ (1.5 mg, 0.0068 mmol, 5.0 equiv). The reaction mixture stirred at 0 °C for 2 h and additional DDQ (1.5 mg, 0.0068 mmol, 5.0 equiv) was then added. Stirring continued for 1.5 h and the reaction mixture was diluted with  $\text{CH}_2\text{Cl}_2$  (1 mL) and quenched by addition of saturated aqueous  $\text{NaHCO}_3$  solution (1 mL). After stirring vigorously for 10 min at rt the mixture was partitioned between  $\text{CH}_2\text{Cl}_2$  (5 mL) and saturated aqueous  $\text{NaHCO}_3$  solution (5 mL). The aqueous phase was separated and extracted with  $\text{CH}_2\text{Cl}_2$  (3 x 5 mL). The combined organic phases were dried over  $\text{Na}_2\text{SO}_4$ , and concentrated under reduced pressure. The crude material was taken on to the next step without purification.

To a 4 mL reaction vial containing the aforementioned analogue precursor was added a 0.25 M solution of  $\text{LiBF}_4$  in 25:1  $\text{CH}_3\text{CN}/\text{H}_2\text{O}$  (238  $\mu\text{L}$ , 0.059 mmol, 45.0 equiv). The reaction vial was sealed and the mixture was allowed to stir at 80 °C for 10 h. After cooling to rt, the reaction mixture was diluted with EtOAc (1 mL) and was quenched by

## Supporting Information

addition of saturated aqueous NaHCO<sub>3</sub> solution (0.5 mL). The mixture was partitioned between EtOAc (10 mL) and saturated NaHCO<sub>3</sub> aqueous solution (5 mL). The phases were separated and the aqueous phase was extracted with EtOAc (3 x 10 mL). The combined organic phases were dried over Na<sub>2</sub>SO<sub>4</sub> and concentrated under reduced pressure. Purification was accomplished using flash chromatography with a 0.6 x 4 cm silica gel column, eluting with 40% EtOAc/hexanes, collecting 6 x 50 mm test tube fractions. The product containing fractions (4-13) were combined and concentrated under reduced pressure to provide analogue **MERLE 27** (0.93 mg, 87% over 2 steps) as a colorless oil:  $R_f = 0.11$  (50% EtOAc/Hexanes);  $[\alpha]_D^{20} = +20$  (c=0.047, CHCl<sub>3</sub>); 500 MHz <sup>1</sup>H NMR (CDCl<sub>3</sub>)  $\delta$  5.99 (d,  $J = 2.0$  Hz, 1H), 5.79 (d,  $J = 16.1$  Hz, 1H), 5.33 (dd,  $J = 15.6, 8.3$  Hz, 1H), 5.23 (ddd,  $J = 11.7, 5.9, 2.9$  Hz, 1H), 5.13 (s, 1H), 4.90-4.80 (m, 1H), 4.72 (d,  $J = 4.4$  Hz, 2H), 4.41 (d,  $J = 12.2$  Hz, 1H), 4.23 (t,  $J = 11.7$  Hz, 1H), 4.08-4.00 (m, 2H), 3.83 (q,  $J = 6.3$  Hz, 1H), 3.73-3.71 (m, 1H), 3.68 (s, 3H), 3.65-3.50 (m, 3H), 2.51 (dd,  $J = 12.2, 2.0$  Hz, 1H), 2.45 (t,  $J = 11.7$  Hz, 1H), 2.31 (ddd,  $J = 7.8, 3.9, 3.9$  Hz, 2H), 2.13-2.06 (m, 2H), 2.06-2.00 (m, 5H), 2.00-1.96 (m, 2H), 1.96-1.92 (m, 6H), 1.78-1.68 (m, 1H), 1.66-1.60 (m, 2H), 1.56-1.48 (m, 2H), 1.36-1.22 (m, 10H), 1.14 (s, 3H), 1.01 (s, 3H), 0.92-0.84 (m, 6H); 125 MHz <sup>13</sup>C NMR (CDCl<sub>3</sub>)  $\delta$  172.3, 172.2, 170.7, 167.2, 152.1, 143.9, 139.0, 130.0, 119.9, 108.9, 99.1, 80.2, 77.8, 76.9, 74.4, 73.9, 73.6, 70.5, 69.6, 68.7, 64.7, 51.3, 45.1, 43.1, 42.8, 41.5, 40.0, 37.5, 36.1, 34.9, 31.9, 31.8, 31.5, 29.2, 29.1, 25.0, 24.9, 22.9, 22.8, 21.4, 20.0, 20.0, 4.3; 125 MHz DEPT <sup>13</sup>C NMR (CDCl<sub>3</sub>) CH<sub>3</sub>  $\delta$  51.3, 25.0, 21.4, 20.0, 20.0, 14.3; CH<sub>2</sub>  $\delta$  108.9, 43.1, 42.8, 41.5, 40.0, 37.5, 36.1, 34.9, 31.9, 31.8, 31.5, 29.2, 29.1, 24.9, 22.9, 22.8; CH  $\delta$  139.0, 130.0, 119.9, 80.2, 77.8, 76.9, 74.4, 73.9, 73.6, 70.5, 69.6, 68.7, 64.7; C  $\delta$  172.3, 172.2, 170.7, 167.2,

152.1, 143.9, 99.1, 45.1; IR (neat) 3583, 3458, 3070, 2955, 2932, 2857, 1734, 1612, 1513, 1472, 1463, 1377, 1250, 1172, 1105, 843, 823, 742, 703, 688  $\text{cm}^{-1}$ ; HRMS (ESI/APCI) calcd for  $\text{C}_{43}\text{H}_{66}\text{O}_{14}\text{Na}$  ( $\text{M}+\text{Na}$ ) 829.4350, found 829.4372.

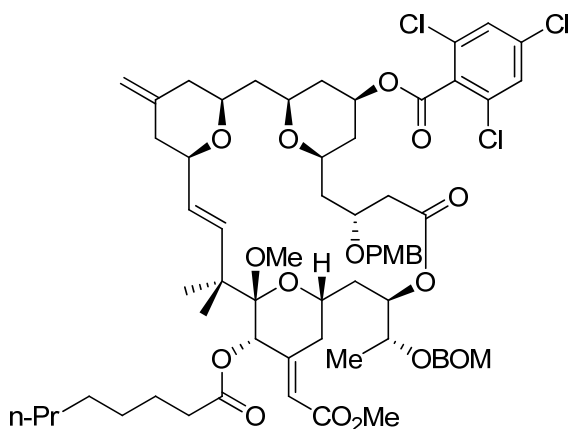

#### Preparation of macrolactone (22):

Prepared from **21** (2.8 mg) in the same manner as **12** to provide product **22** (2.6 mg, 79 %) as a white film:  $R_f = 0.20$  (20% EtOAc/Hexanes);  $[\alpha]_D^{20} = +5$  ( $c=0.10$ ,  $\text{CHCl}_3$ ); 500 MHz  $^1\text{H}$  NMR ( $\text{CDCl}_3$ )  $\delta$  7.40-7.28 (m, 7H), 7.22 (d,  $J = 8.8$  Hz, 2H), 6.85 (d,  $J = 8.8$  Hz, 2H), 6.22 (d,  $J = 15.6$  Hz, 1H), 5.93 (d,  $J = 1.0$  Hz, 1H), 5.58 (ddd,  $J = 11.7, 4.4, 2.4$  Hz, 1H), 5.34 (dd,  $J = 15.6, 8.3$  Hz, 1H), 5.20-5.11 (m, 2H), 4.83 (s, 1H), 4.78 (d,  $J = 8.8$  Hz, 2H), 4.66 (d,  $J = 11.7$  Hz, 1H), 4.62 (d,  $J = 11.7$  Hz, 1H), 4.53 (d,  $J = 10.7$  Hz, 1H), 4.48 (d,  $J = 10.7$  Hz, 1H), 4.24-4.15 (m, 1H), 4.00-3.90 (m, 2H), 3.77 (s, 3H), 3.72-3.66 (m, 4H), 3.62 (dd,  $J = 14.2, 7.3$  Hz, 1H), 3.54-3.46 (m, 2H), 3.24 (t,  $J = 11.3$  Hz, 1H), 3.06 (s, 3H), 2.50 (d,  $J = 6.9$  Hz, 2H), 2.33-2.23 (m, 3H), 2.20 (d,  $J = 12.7$  Hz, 1H), 2.13-1.95 (m, 6H), 1.90-1.81 (m, 2H), 1.80-1.75 (m, 1H), 1.65-1.50 (m, 6H), 1.34-1.20 (m, 10H), 1.10 (s, 6H), 1.08 (s, 3H), 0.88 (t,  $J = 6.8$  Hz, 3H); 125 MHz  $^{13}\text{C}$  NMR ( $\text{CDCl}_3$ )  $\delta$  172.2, 172.1, 167.0, 164.9, 159.3, 151.5, 144.4, 141.7, 138.1, 134.7, 133.2, 132.3, 130.9, 129.9, 129.8, 129.6, 128.6, 128.1, 127.9, 127.8, 125.8, 119.5, 113.9, 109.1, 103.4, 93.7, 81.5, 76.3, 74.6, 73.7, 73.5, 73.3, 73.2, 72.3, 71.5, 70.9, 69.8, 67.3, 55.5, 52.8, 51.4, 45.3,

## Supporting Information

44.0, 42.9, 42.0, 41.5, 41.0, 37.3, 34.8, 31.9, 31.1, 29.9, 29.2, 26.5, 24.9, 22.8, 20.3, 15.4, 14.3; 125 MHz DEPT  $^{13}\text{C}$  NMR ( $\text{CDCl}_3$ )  $\text{CH}_3$   $\delta$  55.5, 52.8, 51.4, 26.5, 15.3, 14.3;  $\text{CH}_2$   $\delta$  109.1, 93.7, 72.3, 69.8, 44.0, 42.9, 42.0, 41.5, 41.0, 37.3, 34.8, 31.9, 31.1, 29.9, 29.2, 29.1, 24.9, 22.8, 20.3;  $\text{CH}$   $\delta$  141.7, 129.6, 128.6, 128.1, 127.9, 127.9, 125.8, 119.5, 113.9, 81.5, 76.3, 74.6, 73.7, 73.5, 73.3, 73.2, 71.5, 70.9, 67.3;  $\text{C}$   $\delta$  172.2, 172.1, 167.0, 164.9, 159.3, 151.5, 144.4, 138.1, 134.7, 133.2, 132.3, 130.9, 129.9, 129.8, 103.4, 45.3; IR (neat) 2926, 2853, 1738, 1651, 1580, 1548, 1514, 1435, 1382, 1249, 1160, 1103, 1042, 819, 668, 541  $\text{cm}^{-1}$ ; LRMS (EI) Calcd for  $\text{C}_{65}\text{H}_{83}\text{Cl}_3\text{O}_{16}\text{Na}$  ( $\text{M}+\text{Na}$ ): 1247.5, Found: 1247.5.

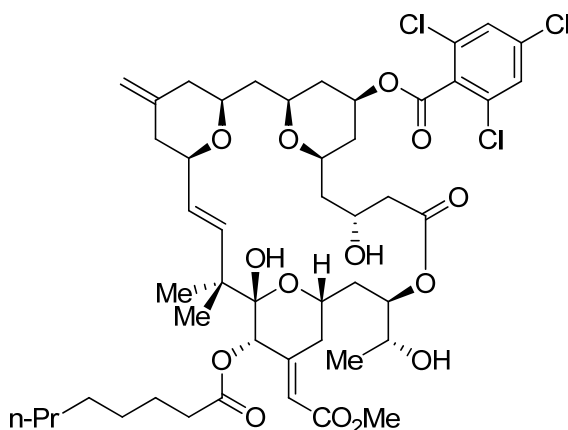

### Preparation of Analogue (14): Prepared

from **22** (2.6 mg) in the same manner as **MERLE 27** to provide the analogue **14** (1.3 mg, 63 %) as a white film:  $R_f = 0.45$  (50% EtOAc/Hexanes);  $[\alpha]_D^{20} = +3$  ( $c=0.065$ ,  $\text{CHCl}_3$ ); 500 MHz  $^1\text{H}$  NMR ( $\text{CDCl}_3$ )  $\delta$  7.35-7.40 (m, 2H), 5.99 (s, 1H), 5.79 (d,  $J = 15.6$  Hz, 1H), 5.33 (dd,  $J = 16.1, 8.8$  Hz, 1H), 5.22 (m, 1H), 5.14 (s, 1H), 4.76-4.70 (m, 3H), 4.40 (d,  $J = 12.2$  Hz, 1H), 4.27-4.20 (m, 1H), 4.07-4.00 (m, 2H), 3.85-3.80 (m, 1H), 3.73-3.70 (m, 1H), 3.68 (s, 3H), 3.62-3.55 (m, 3H), 2.54 (d,  $J = 12.2$  Hz, 1H), 2.47 (q,  $J = 12.7$  Hz, 1H), 2.31 (ddd,  $J = 3.4, 7.3, 7.3$  Hz, 2H), 2.18-1.80 (m, 12H), 1.66-1.40 (m, 5H), 1.32-1.22 (m, 10H), 1.14 (s, 3H), 1.04 (s, 3H), 0.90-0.84 (m, 3H); 125 MHz  $^{13}\text{C}$  NMR ( $\text{CDCl}_3$ )  $\delta$

## Supporting Information

172.4, 172.2, 167.2, 163.6, 159.7, 152.1, 143.8, 139.0, 132.7, 129.9, 128.3, 119.9, 108.9, 99.1, 95.0, 80.2, 77.8, 77.4, 74.4, 73.9, 73.6, 72.0, 70.5, 68.7, 64.7, 51.3, 45.1, 43.1, 42.8, 42.3, 41.6, 40.0, 37.1, 36.7, 36.1, 34.9, 31.9, 31.5, 29.3, 29.1, 25.0, 24.9, 22.8, 20.1, 20.0, 14.3; IR (neat) 3458, 2933, 2859, 1732, 1611, 1513, 1466, 1428, 1376, 1250, 1172, 1106, 843, 742, 704, 613  $\text{cm}^{-1}$ . LRMS (EI) Calcd for  $\text{C}_{48}\text{H}_{65}\text{Cl}_3\text{O}_{14}\text{Na}$  ( $\text{M}+\text{Na}$ ): 993.3, Found: 993.3.

### Summary of Stereochemical Evidence:

The relative stereochemistry of the **C7** hydroxyl group on A-ring pyran in alcohol **4** was confirmed by the observation of a NOE among **C5**, **C7** and **C9** protons on acetate **23**, which was prepared from alcohol **4** by acetylation.

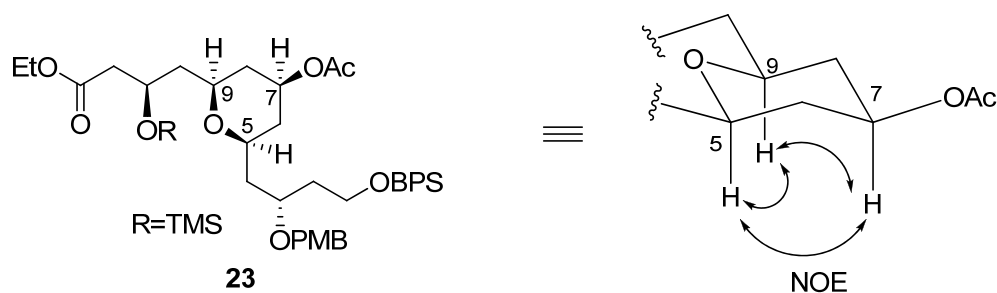

The **C20** stereochemistry was determined using NOE experiments on intermediate **12**. A NOE was observed between the equatorial **C20** proton and the nearby **C34** proton.

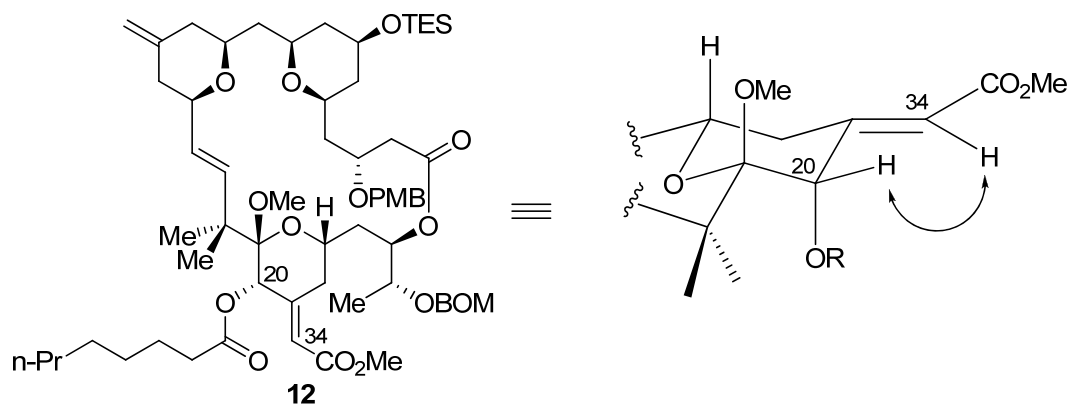

**[3H]PDBu Binding Assay:** The inhibitory dissociation constant ( $K_i$ ) of each bryologue ligand was determined by the ability of the ligand to displace bound [20-3H]phorbol 12,13-dibutyrate (PDBu) from mouse recombinant isozyme PKC  $\alpha$  in the presence of calcium and phosphatidylserine, using a polyethylene glycol precipitation assay previously described by Blumberg and Lewin.<sup>4</sup> Briefly, the assay mixture (250  $\mu$ L) contained 50 mM Tris-HCl (pH 7.4 at room temperature), 100  $\mu$ g/mL phosphatidylserine, 0.1 mM Ca<sup>2+</sup>, 4 mg/mL bovine immunoglobulin G and .003% Tx-100, 2 nM [3H]PDBu and various concentrations of the competing ligand. The assay tubes were incubated at 37  $^{\circ}$ C for 5 min, then chilled for 10 min on ice, after which 200  $\mu$ L of 35% polyethylene glycol 6000 in 50 mM Tris-HCl (pH 7.4) was added. The tubes were vortexed and chilled an additional 10 min and then centrifuged in a Beckman Allegra 21R centrifuge at 4 $^{\circ}$ C (12,200 rpm, 15 min). A 100  $\mu$ L aliquot of each supernatant was removed and placed in a scintillation vial for the determination of the free concentration of [3H]PDBu. Each assay pellet, located in the tip of the assay tube, was carefully dried, cut off, and placed in a scintillation vial for the determination of the total bound [3H]PDBu. The radioactivity was determined by scintillation counting, using Cytoscint (ICN, Costa Mesa, CA). Specific binding was calculated as the difference between total and nonspecific PDBu



## Supporting Information

binding. The Inhibitory dissociation constants ( $K_i$ ) were calculated using the method previously described by Blumberg and Lewin.

**MERLE 27:**  $K_i = 3.0 \pm 0.06$  nM

**Analogue 14:**  $K_i = 16.8 \pm 4.2$  nM

**Attachment and cell proliferation of U937 cells:** U937 cells<sup>5</sup> (Sundstrom and Nilsson, 1976), purchased from ATCC (Manassas, VA) and cultured in RPMI-1640 medium supplemented with 10 % FBS (ATCC, Manassas, VA), were plated in 35 mm dishes at a density of  $1 \times 10^5$  living cells/ml and treated with different concentrations of the drugs or DMSO. After 72 hours, the number of cells in the supernatant (non-attached cells) and the number of attached cells (after trypsinization) were counted using a particle counter. The number of attached cells is expressed as percent of total cells.

**The attachment of U937 cells induced by the indicated compounds compared to bryostatin 1 and PMA:** U937 cells were treated with PMA (0.1-100 nM), bryostatin 1 (1-1000 nM), the indicated compound (1-1000 nM), 10 nM PMA with different concentrations of bryostatin 1 (1-1000 nM) or 10 nM PMA with different concentrations of indicated compound (1-1000 nM) for 72 hours. The number of attached cells and total cells were counted and the attached cells were graphed as percent of total cells. The bars and error bars represent the average and the standard error of the mean of at least three independent experiments.

**The inhibition of U937 cell proliferation induced by the indicated compounds compared to bryostatin 1 and PMA:** U937 cells were treated with PMA (0.1-100 nM), bryostatin 1 (1-1000nM), the indicated compound (1-1000 nM), 10 nM PMA with

## Supporting Information

different concentrations of bryostatin 1 (1-1000 nM) or 10 nM PMA with different concentrations of indicated compound (1-1000 nM). The number of attached and non-attached cells was counted and the number of total cells was expressed as % of control. The bars and error bars represent the average and the standard error of the mean of at least three independent experiments.

## Results of U937 Proliferation and Attachment Assays with MERLE 27:

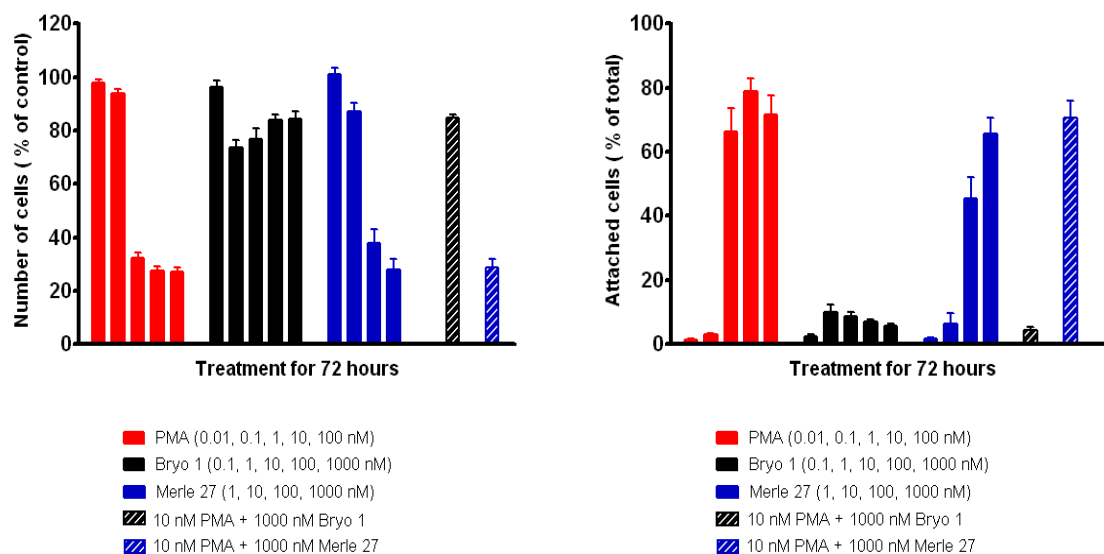

## Results of U937 Proliferation and Attachment Assays with Analogue 14:

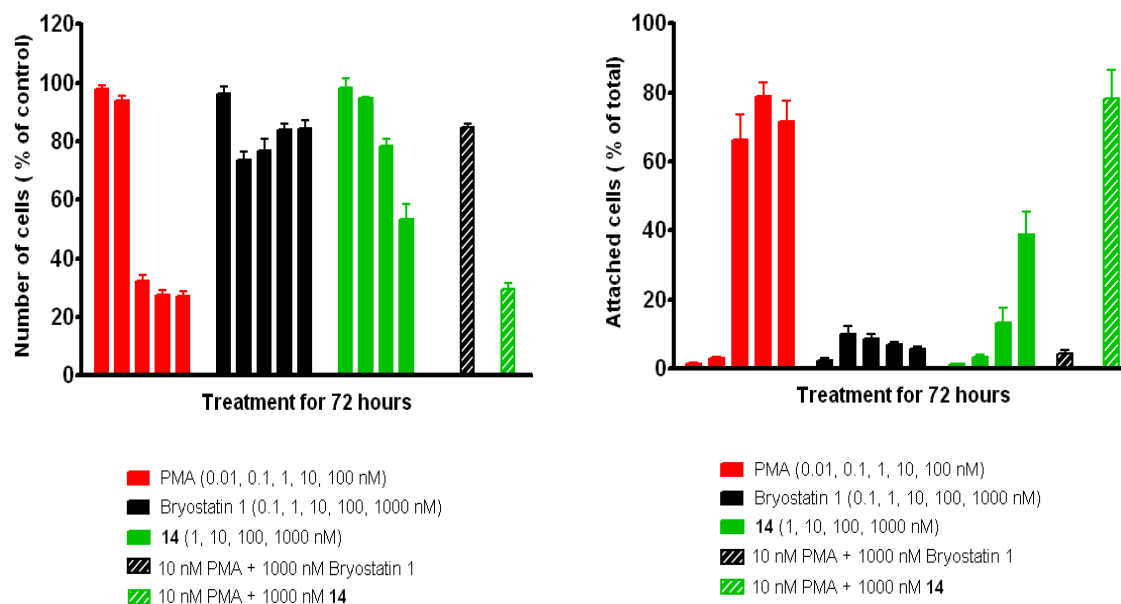

## Results of U937 Attachment Assay With Merle 27 and Merle 28

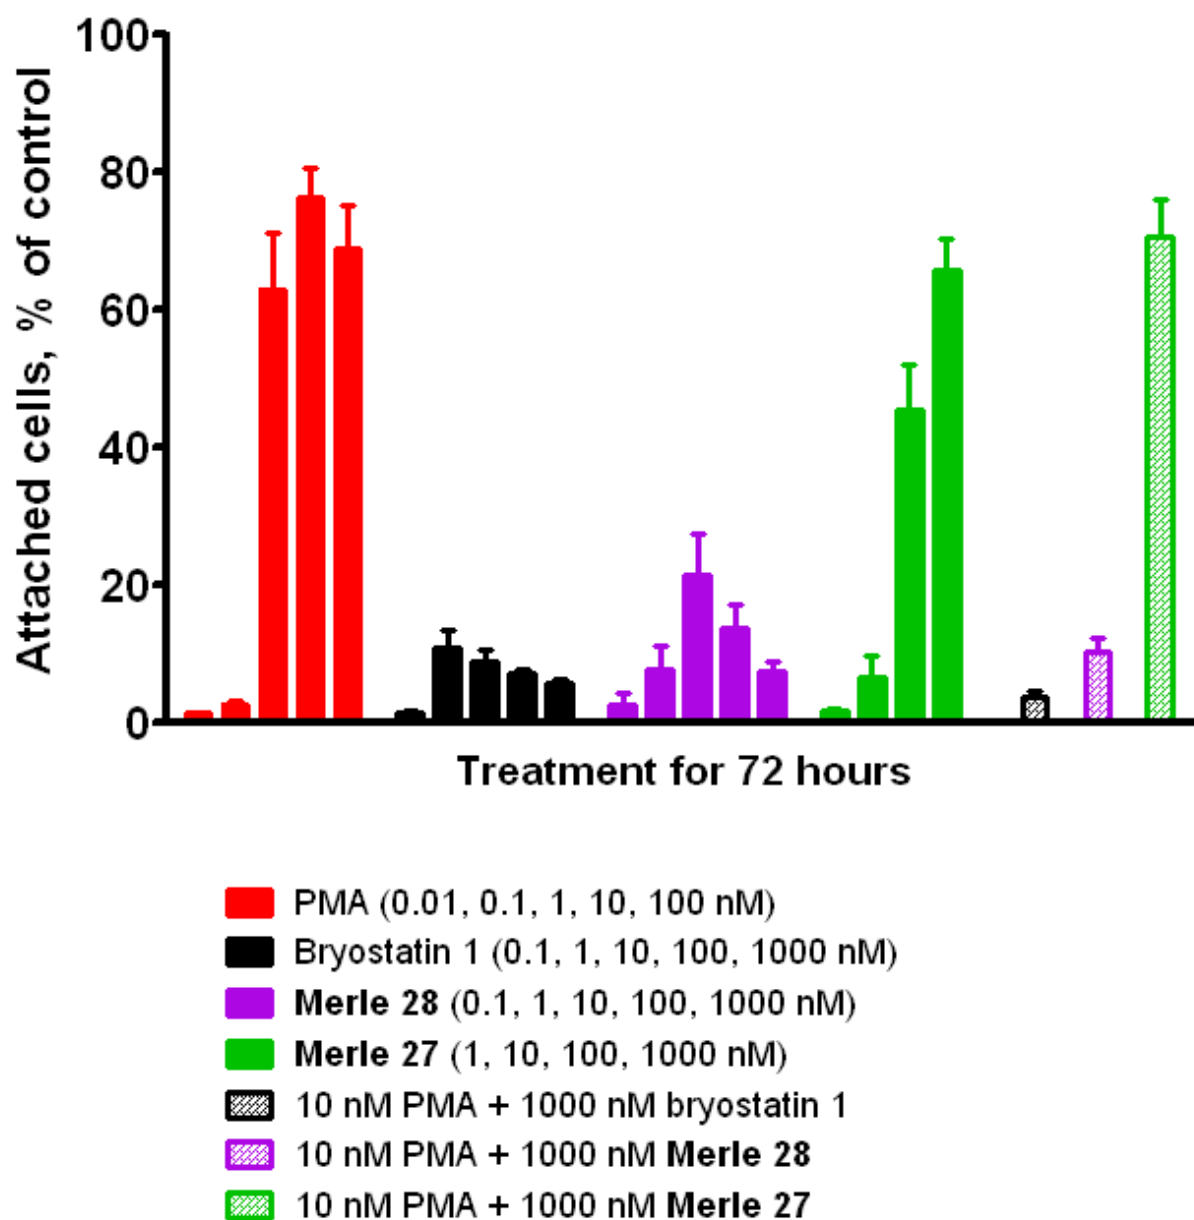

## Results of U937 Proliferation Assay With Merle 27 and Merle 28

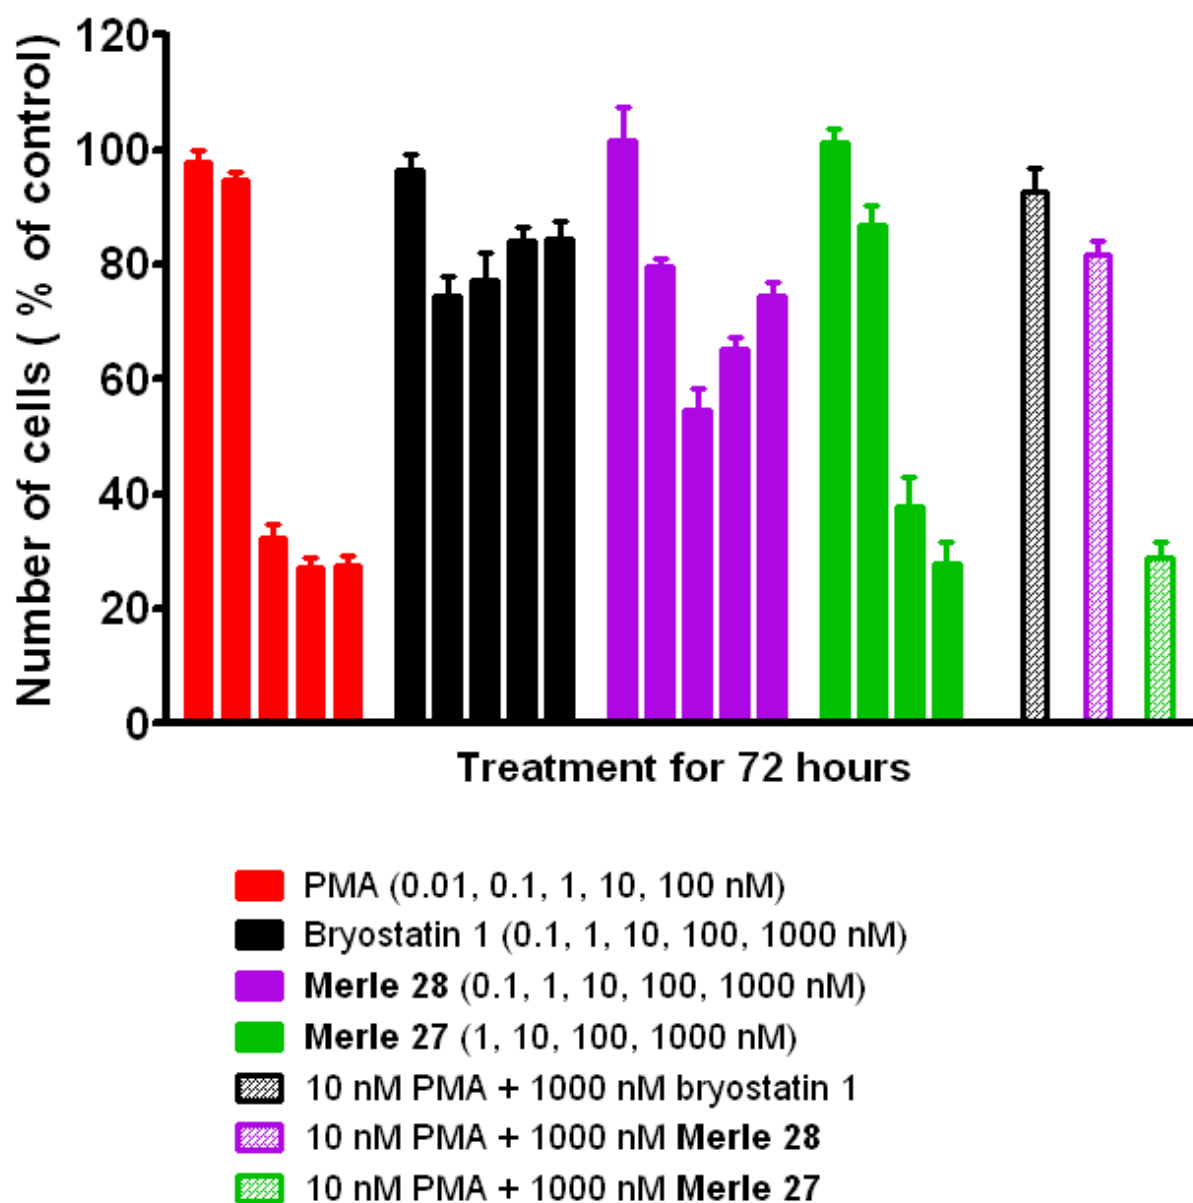

- 
- (1) Armarego, W. L. F.; Perrin, D. D., *Purification of Laboratory Chemicals, Fourth Edition*. Butterworth-Heinemann: Oxford, **1997**.
- (2) Watson, S. C.; Eastham, J. F. *J. Organomet. Chem.* **1967**, 9, 165.
- (3) Keck, G. E.; Kraft, M. B.; Truong, A. P.; Li, W.; Sanchez, C. C.; Kedei, N.; Lewin, N.; Blumberg, P. M. *J. Am. Chem. Soc.* **2008**, 130, 6660–6661.
- (4) Lewin, N. E.; Blumberg, P. M. *Methods Mol. Biol.* **2003**, 233, 129-156.
- (5) Sundstrom, C.; Nilsson, K. *Int. J. Cancer* **1976**, 17, 565-577.

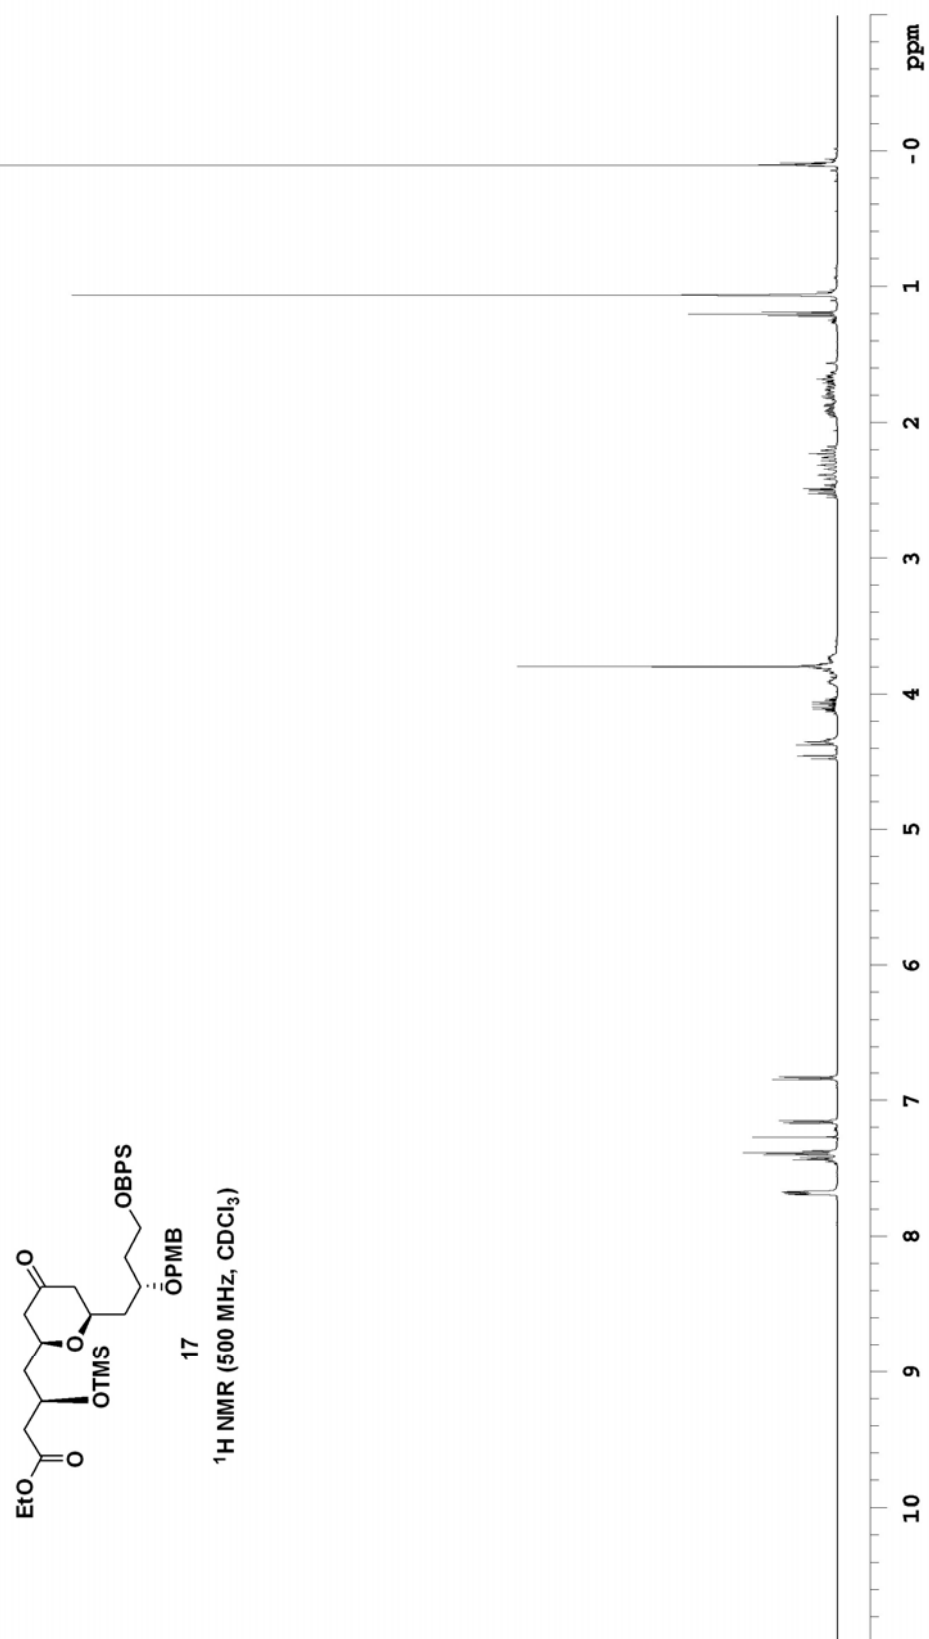

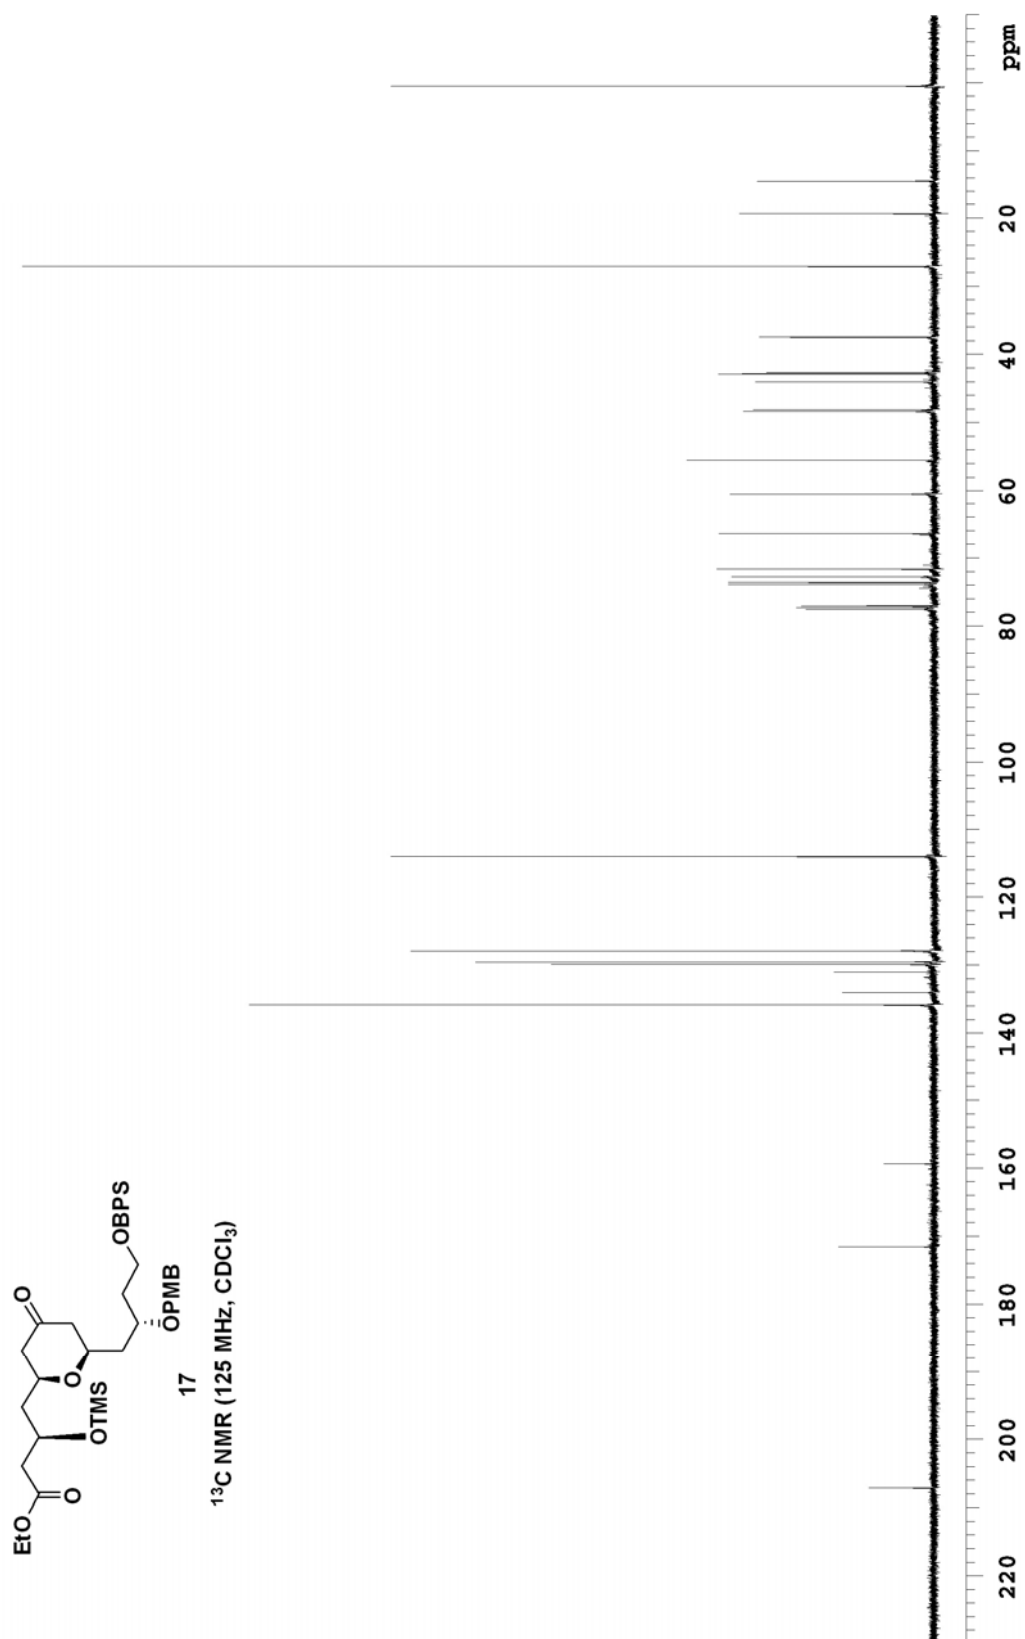



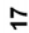DEPT NMR (125 MHz, CDCl<sub>3</sub>)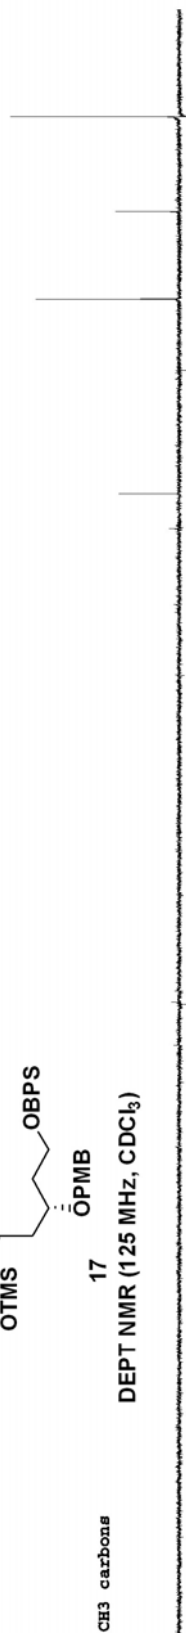

CH2 carbons

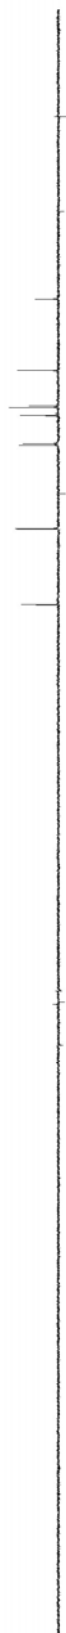

CH carbons

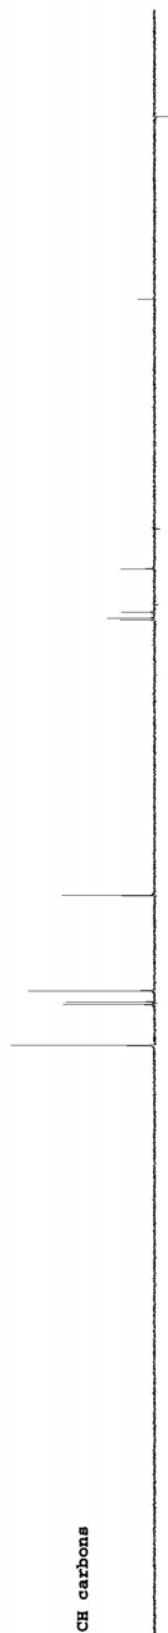

all protonated carbons

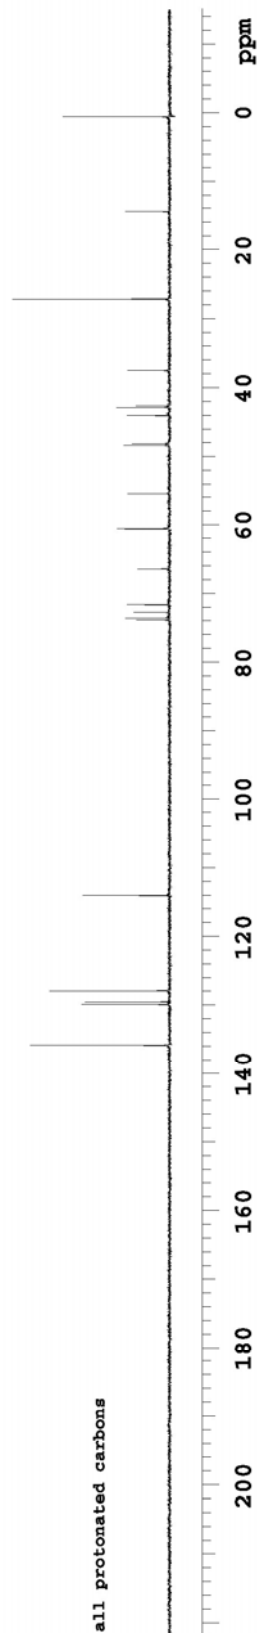

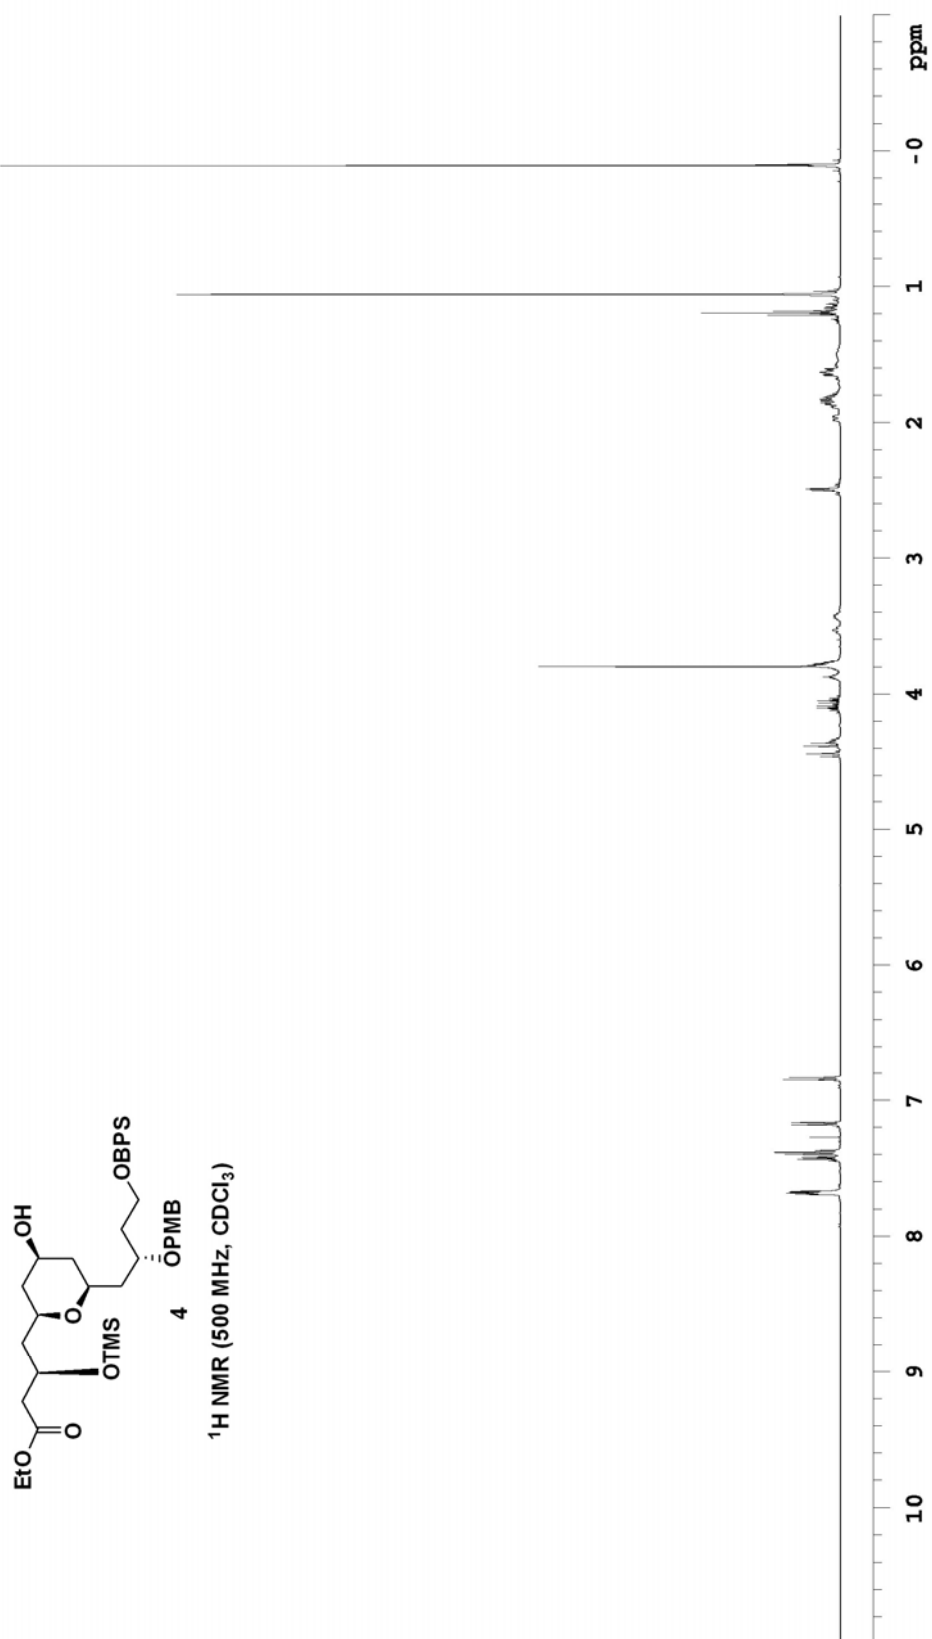

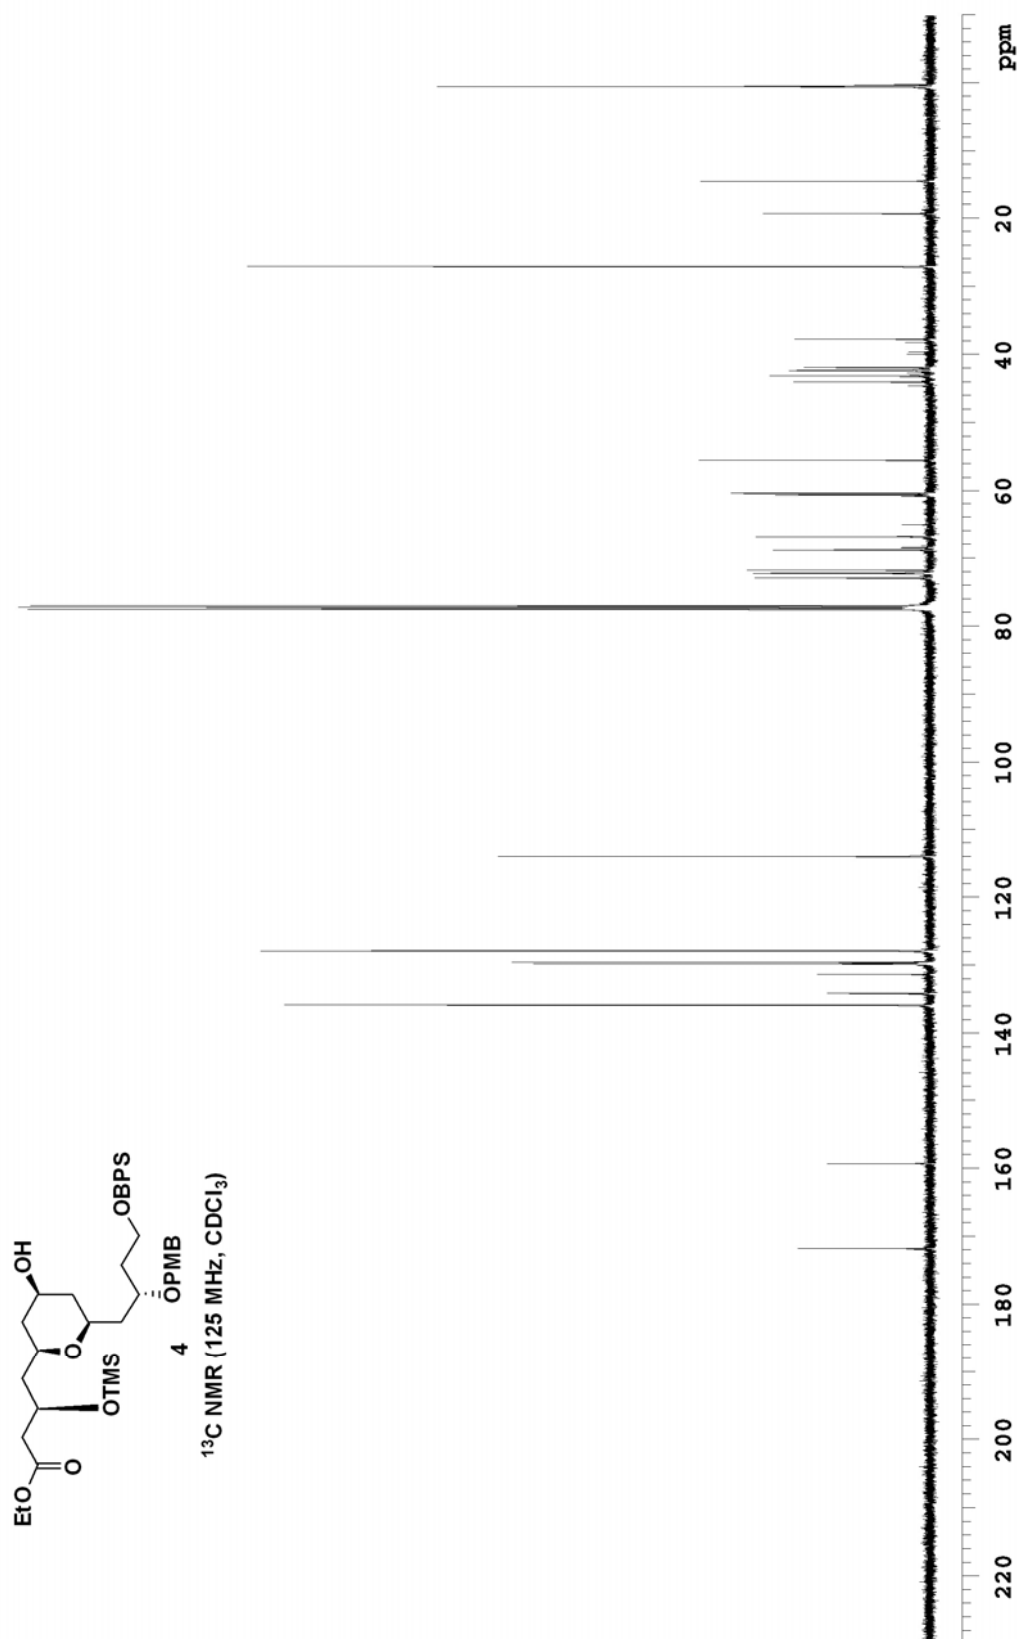

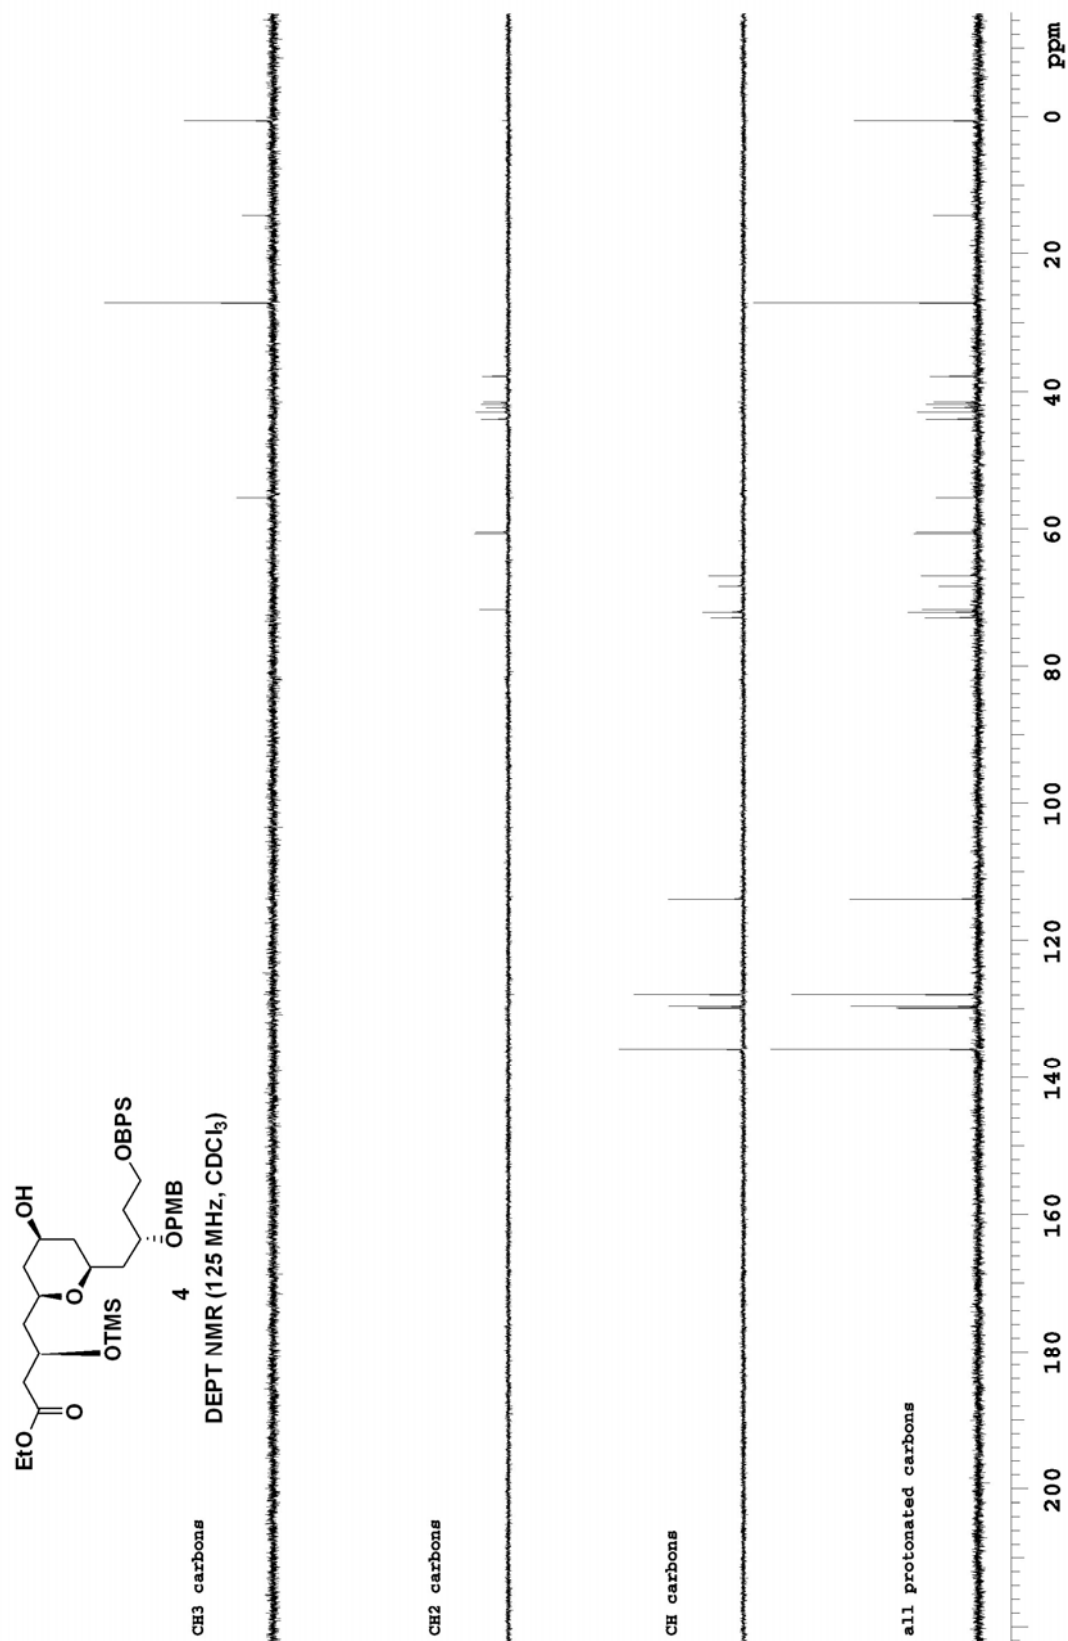

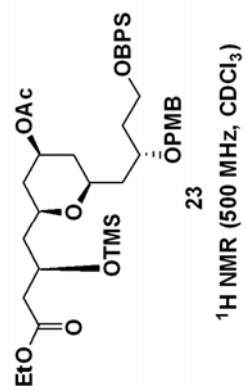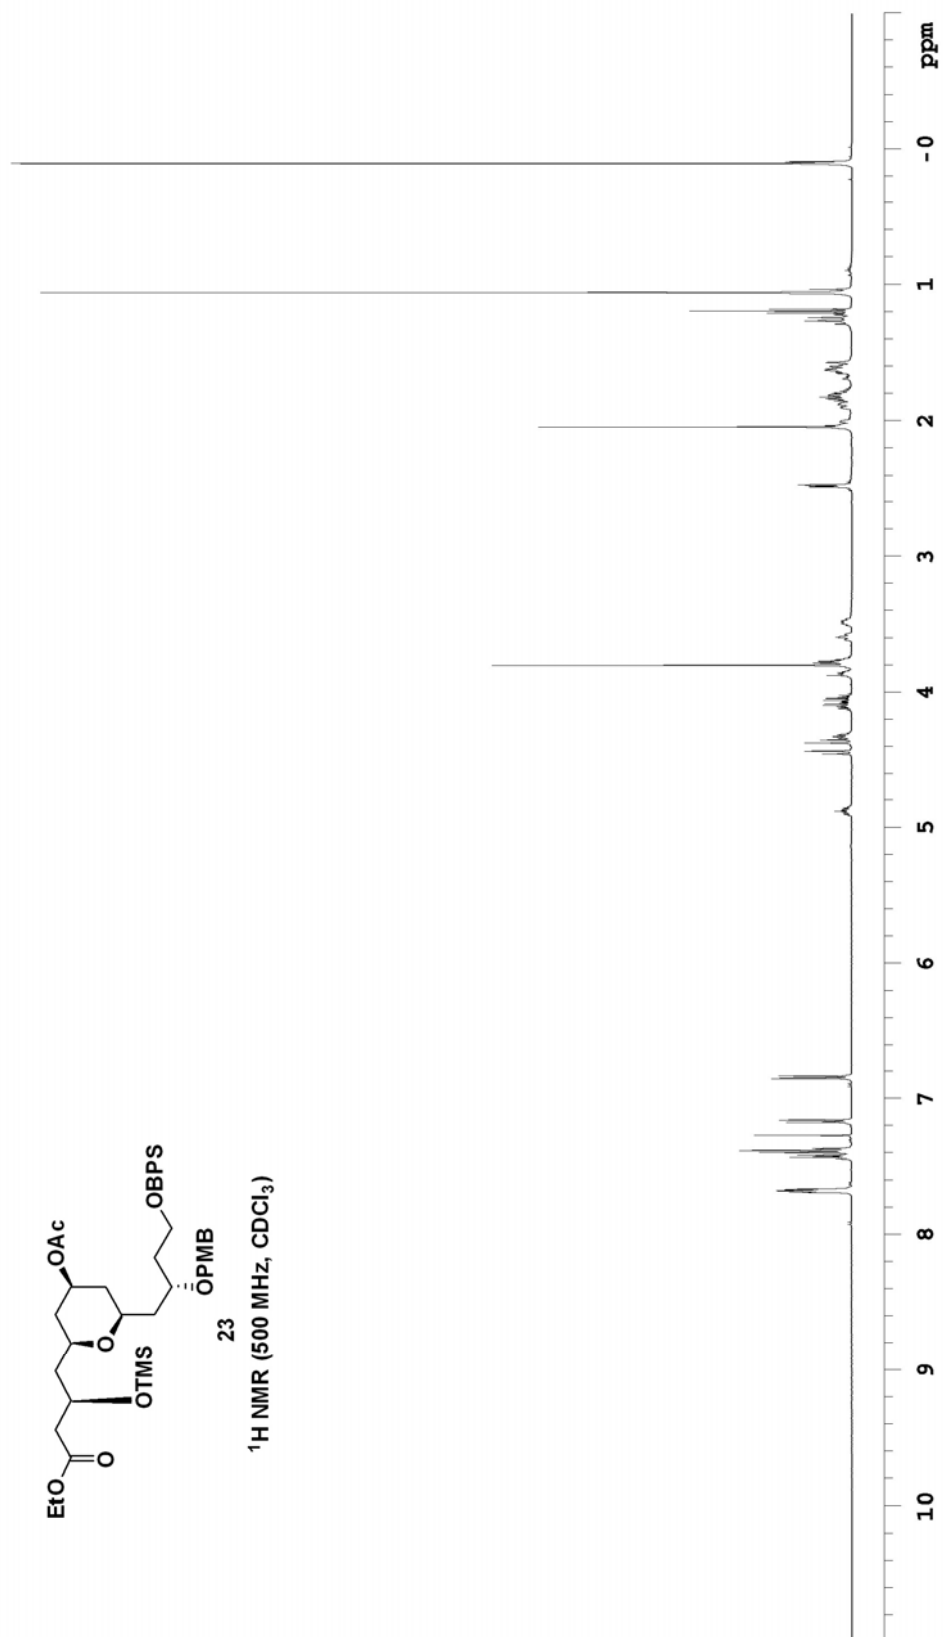

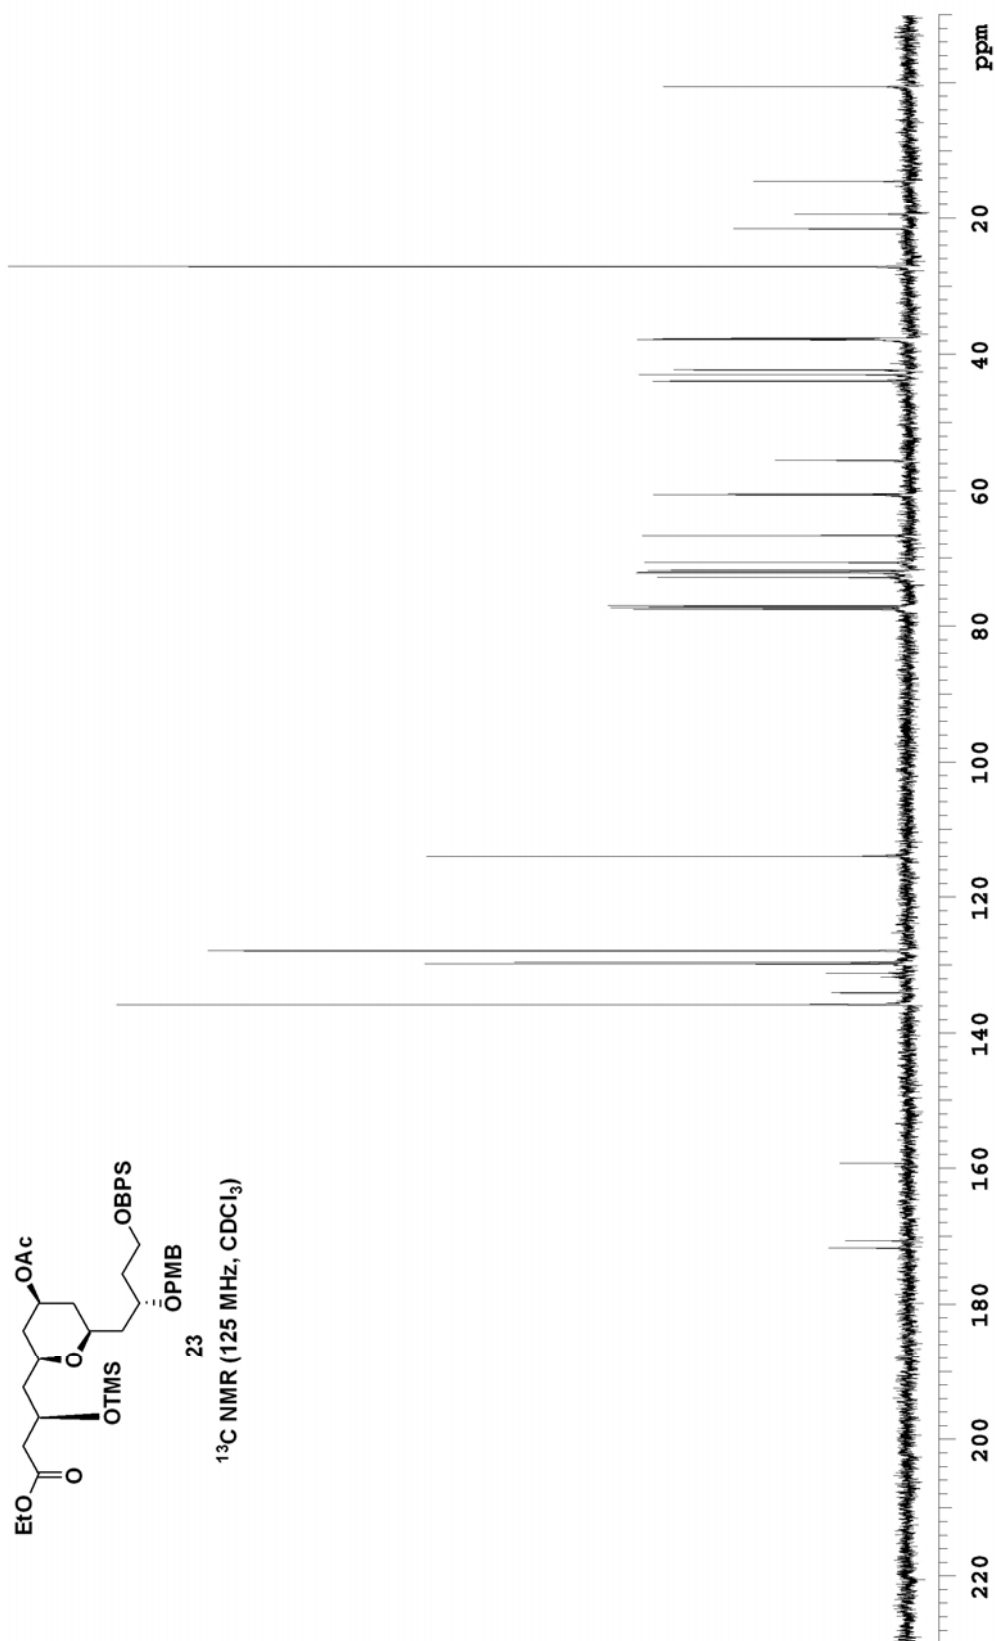

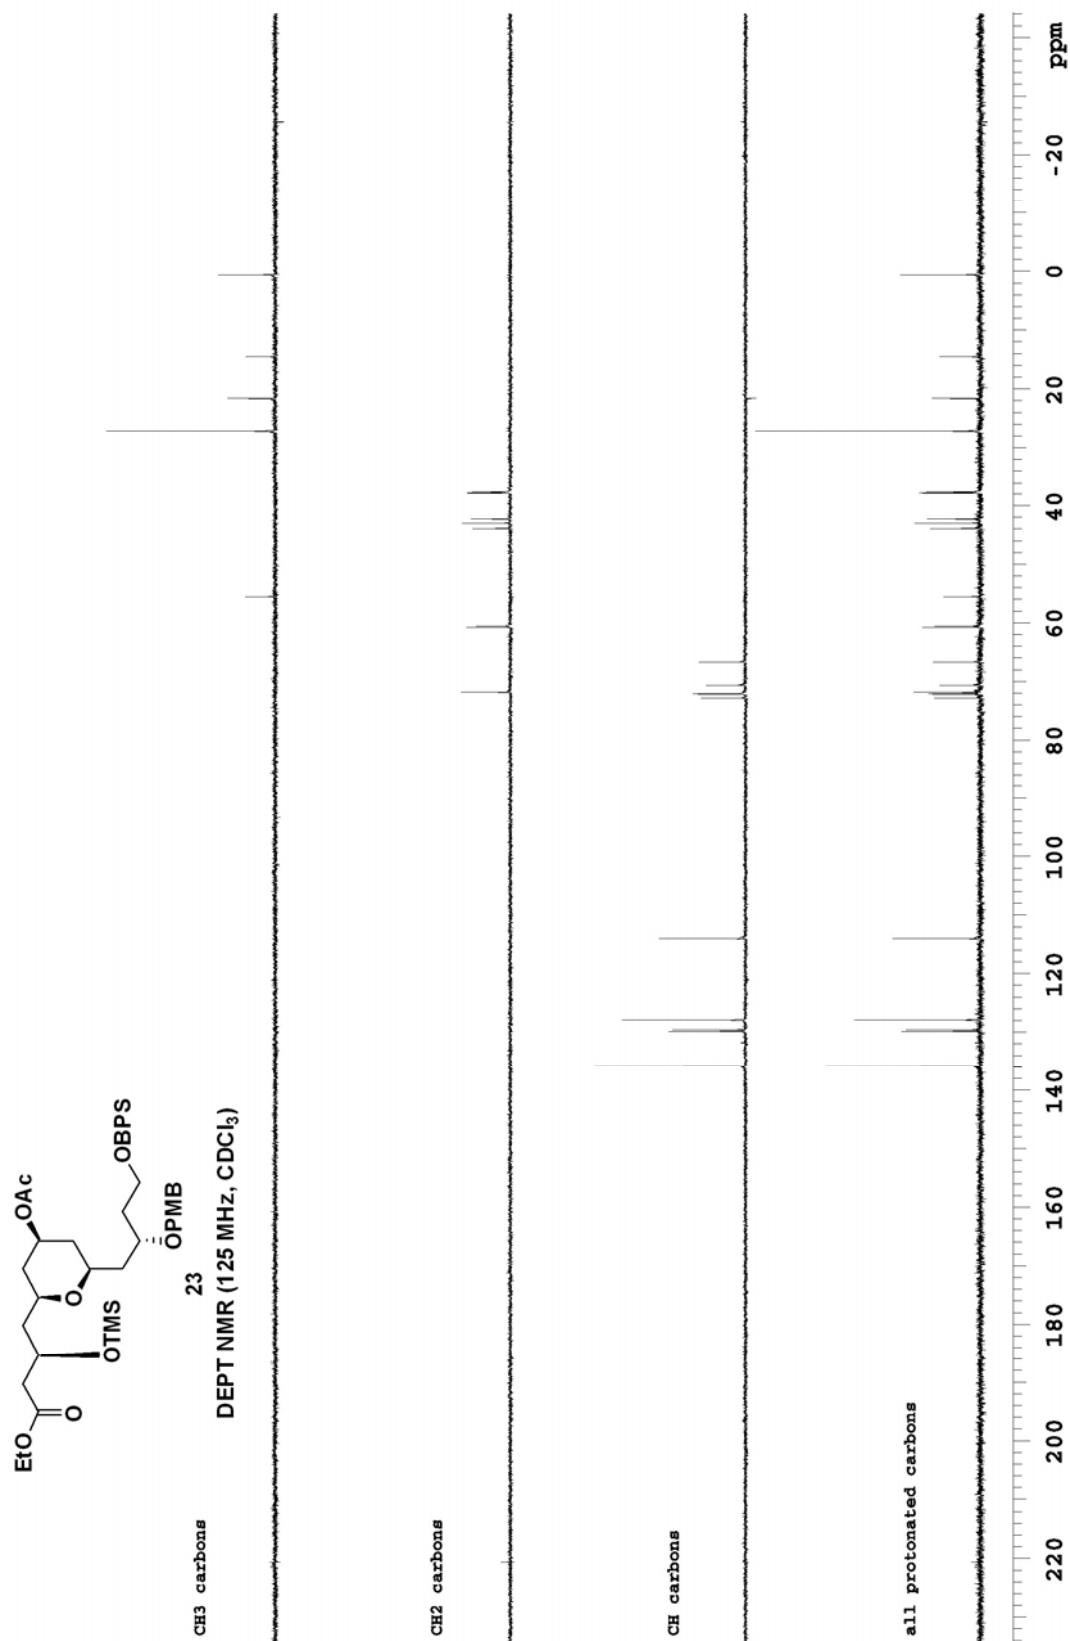

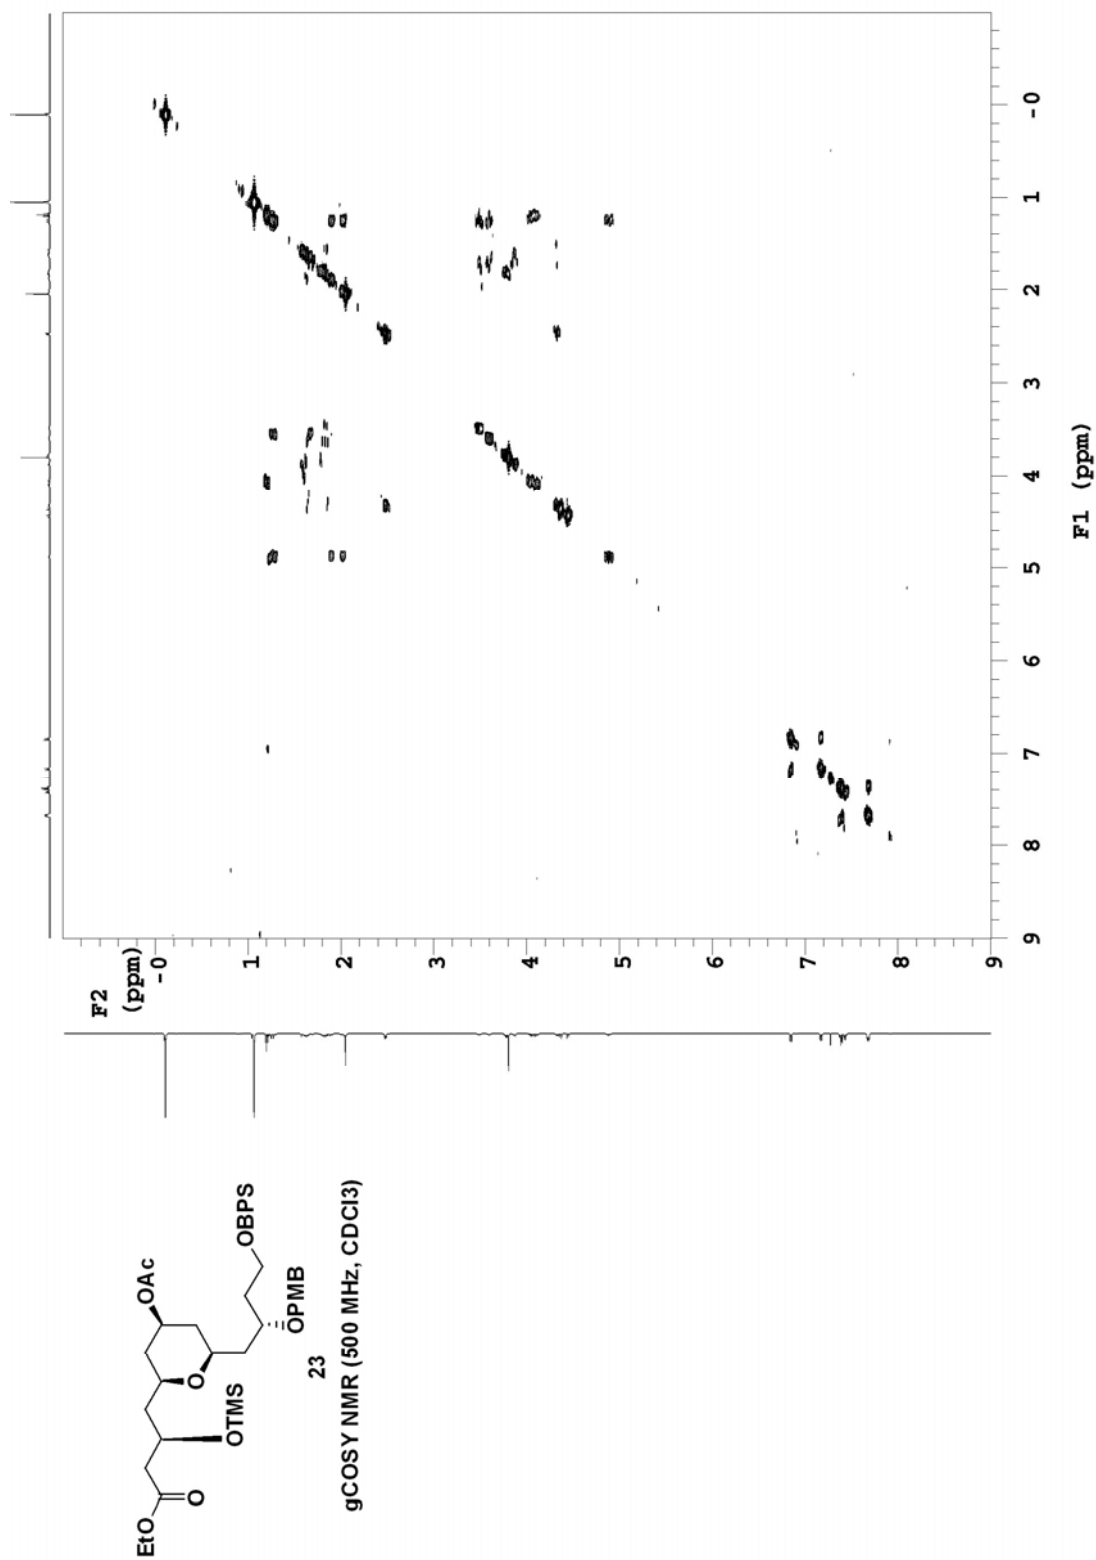



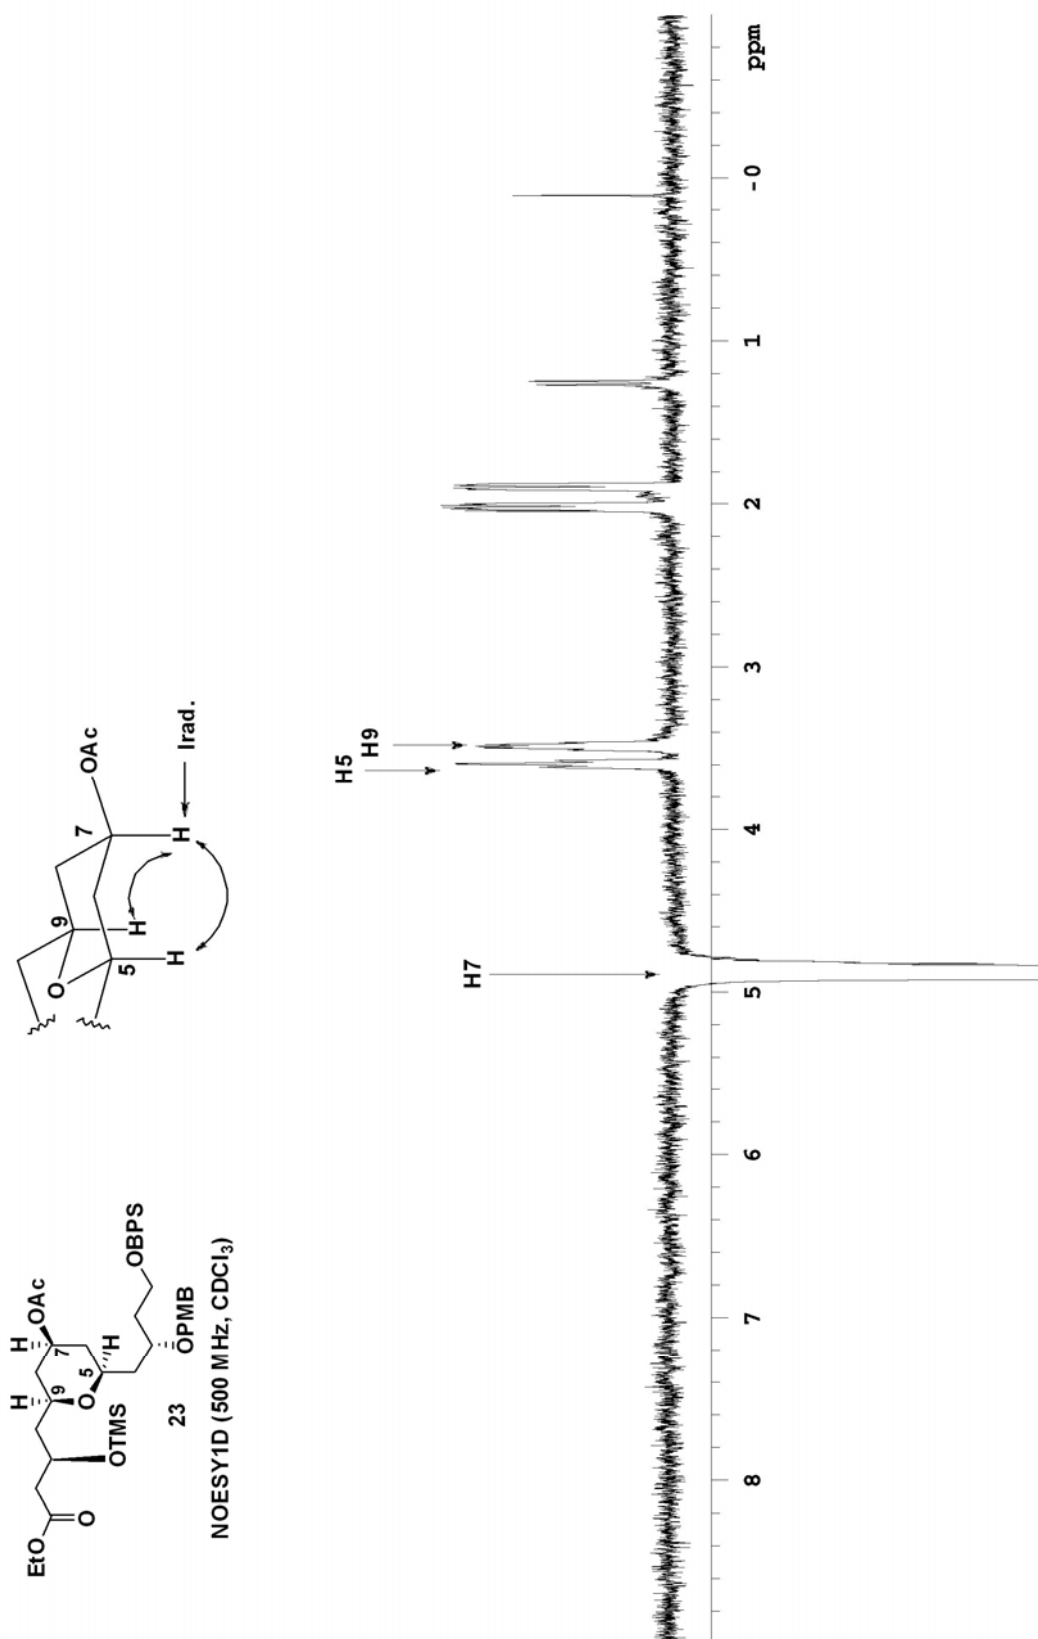

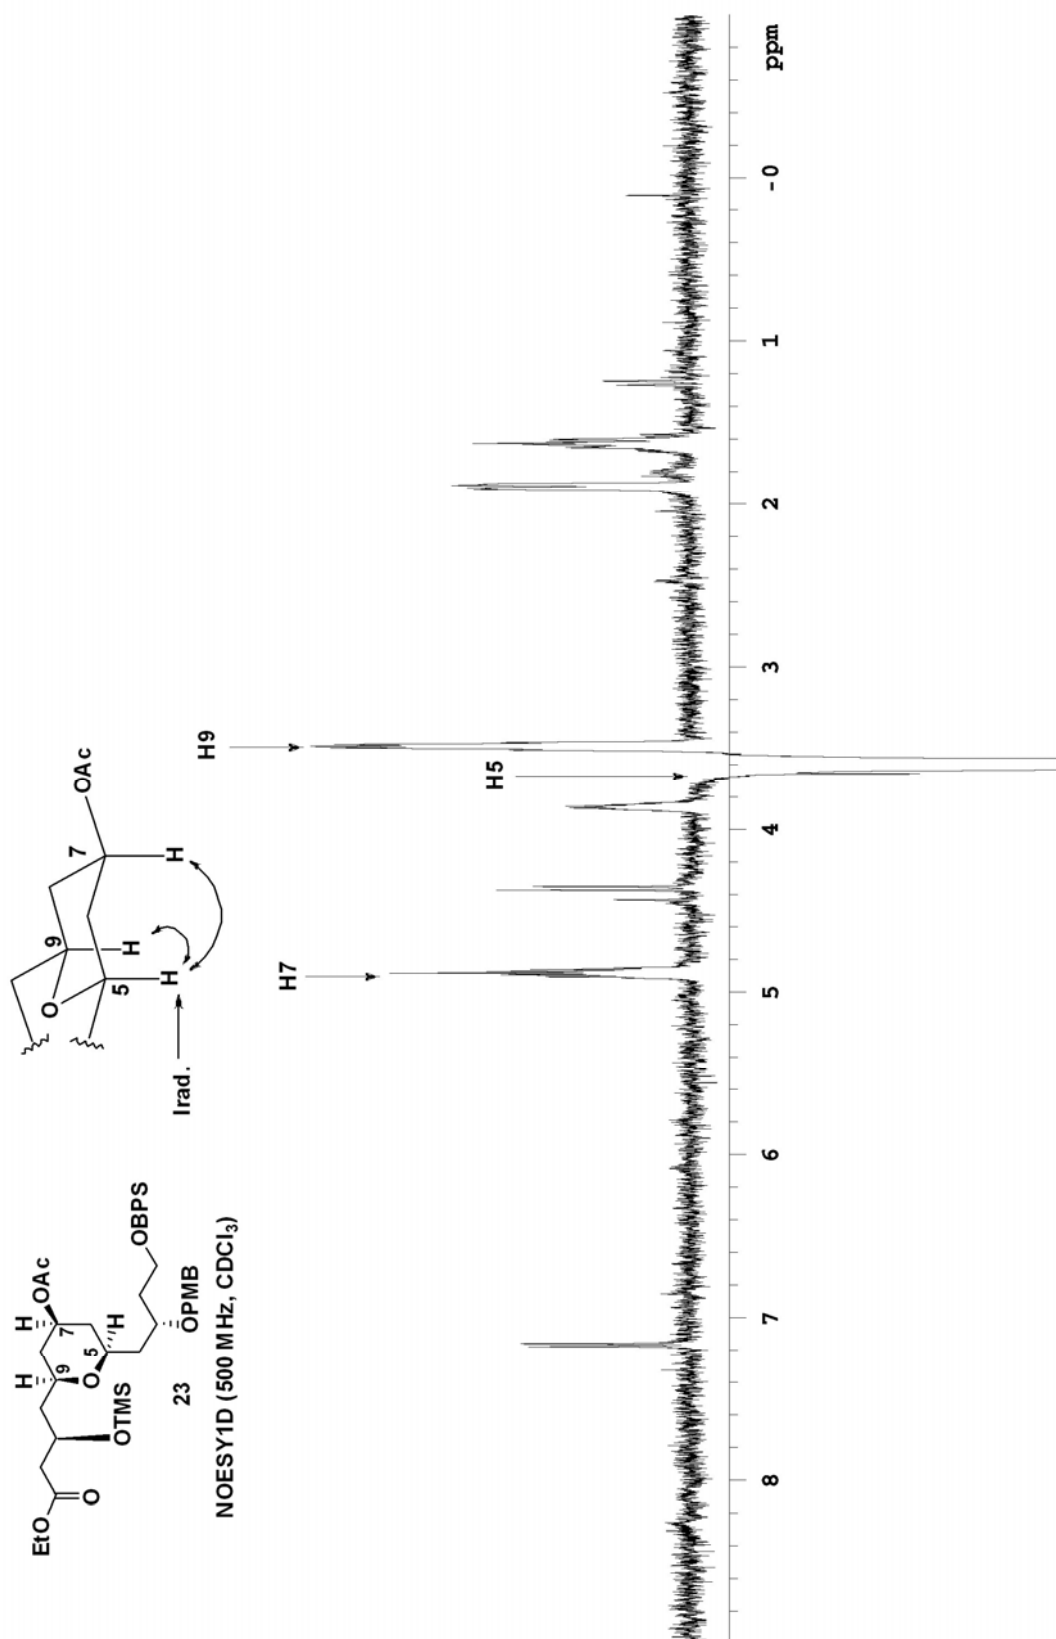

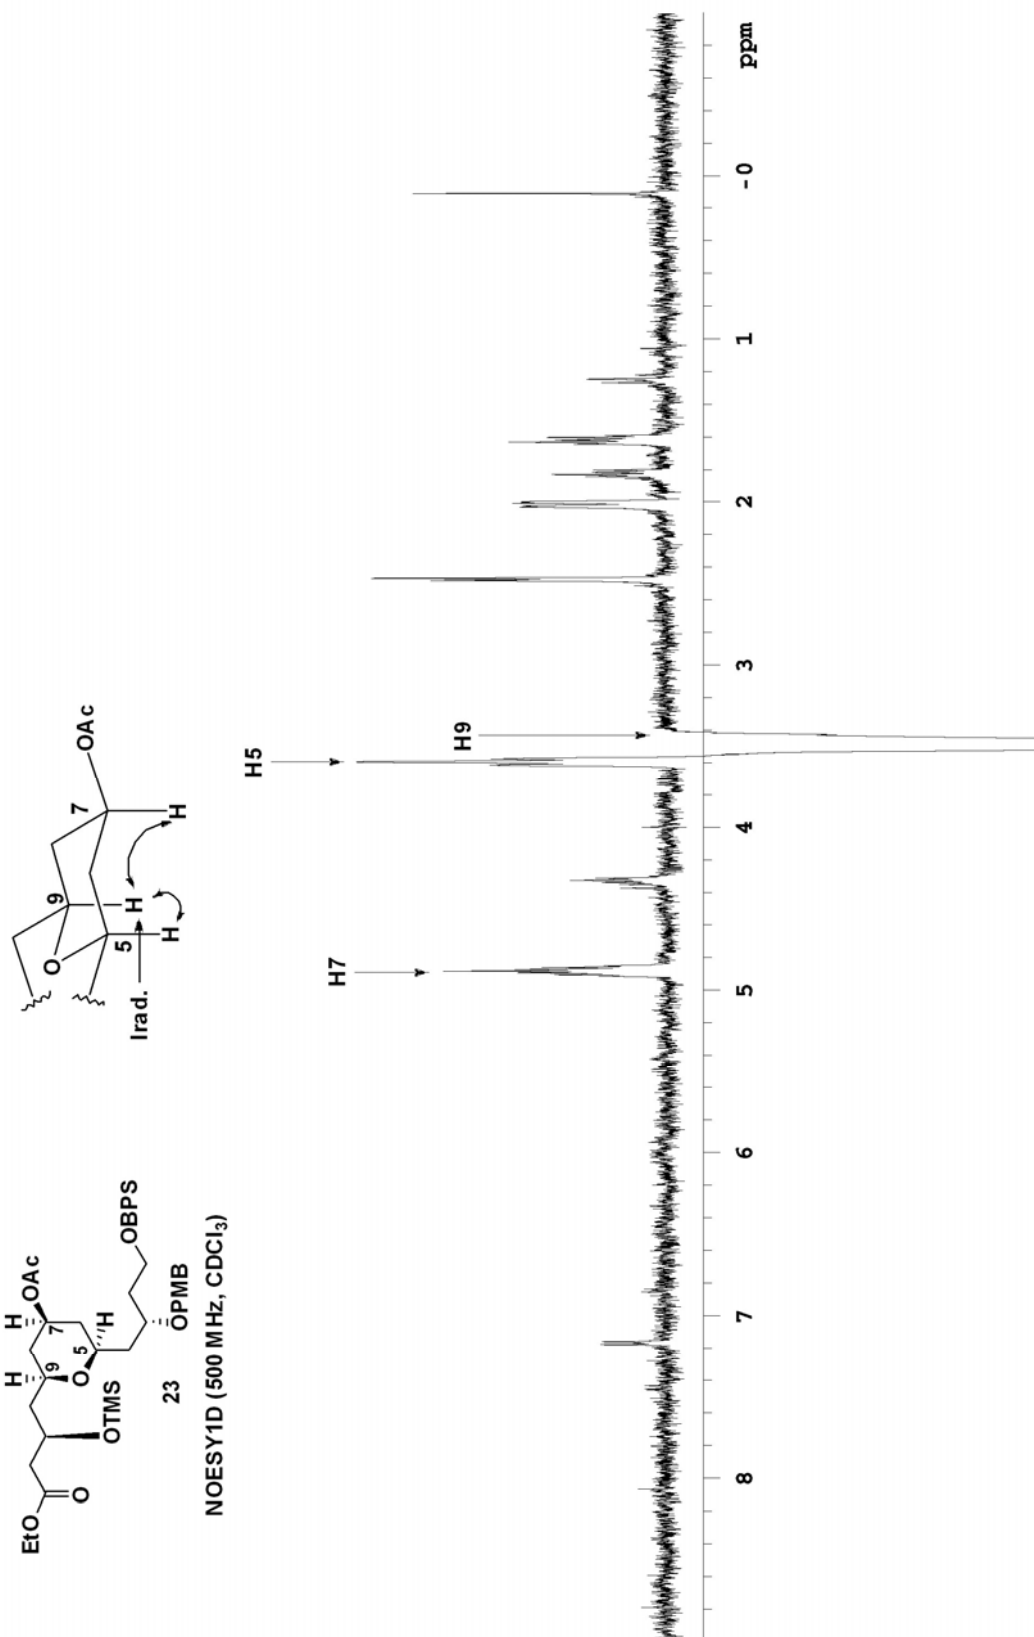

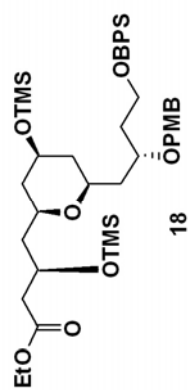

18

OPMB

<sup>1</sup>H NMR (500 MHz, CDCl<sub>3</sub>)

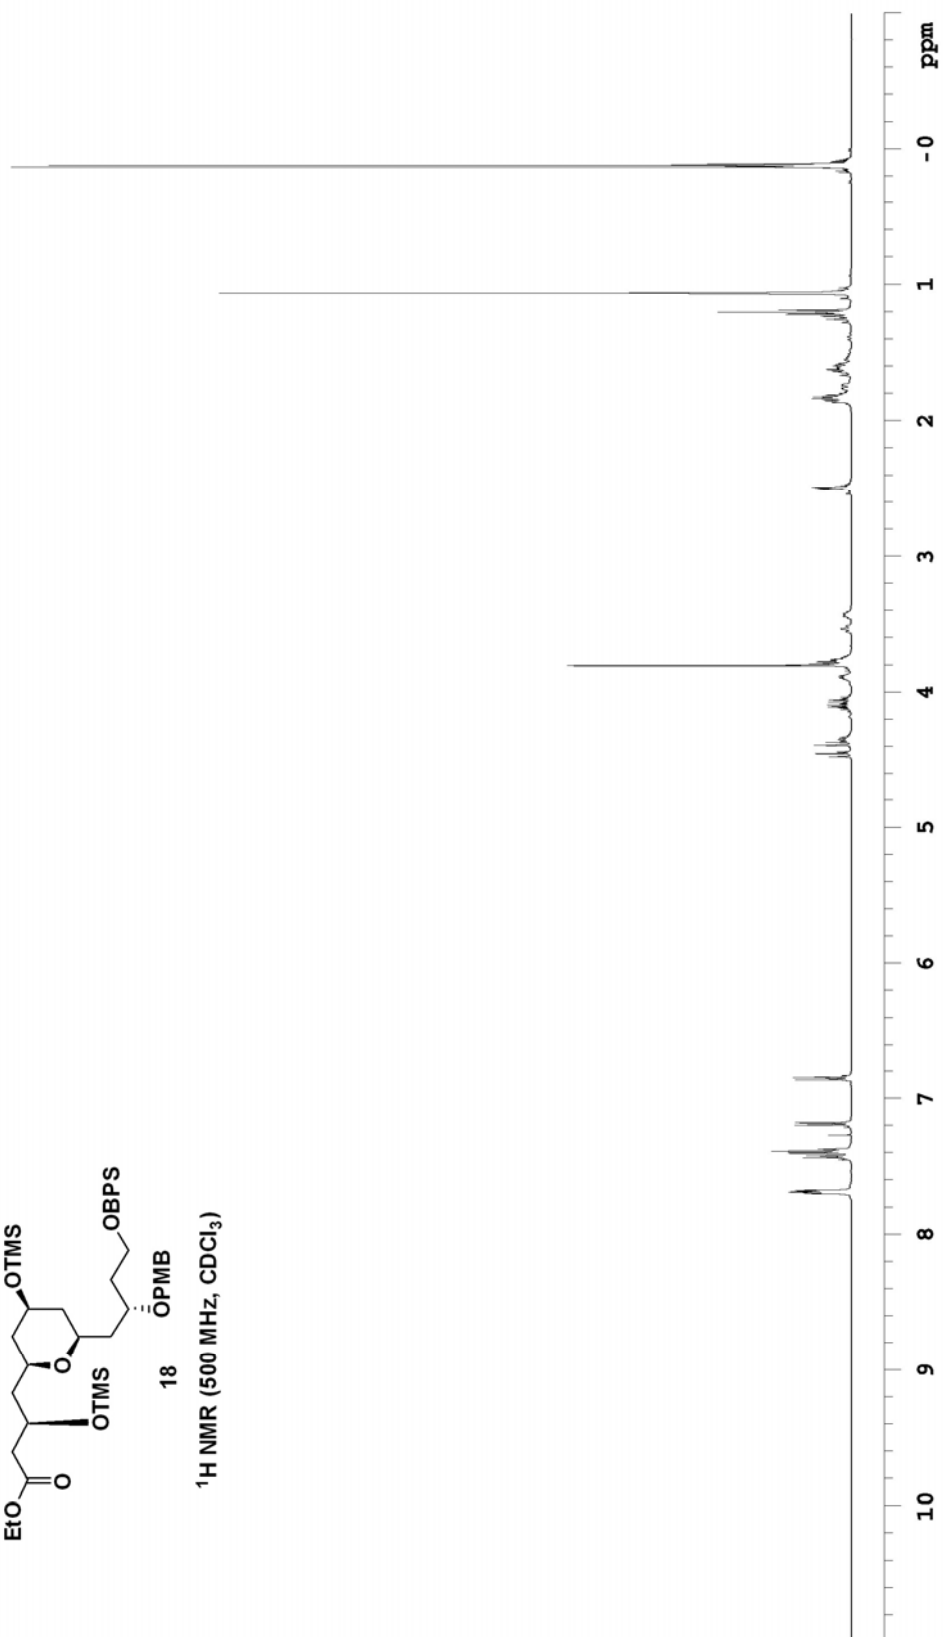

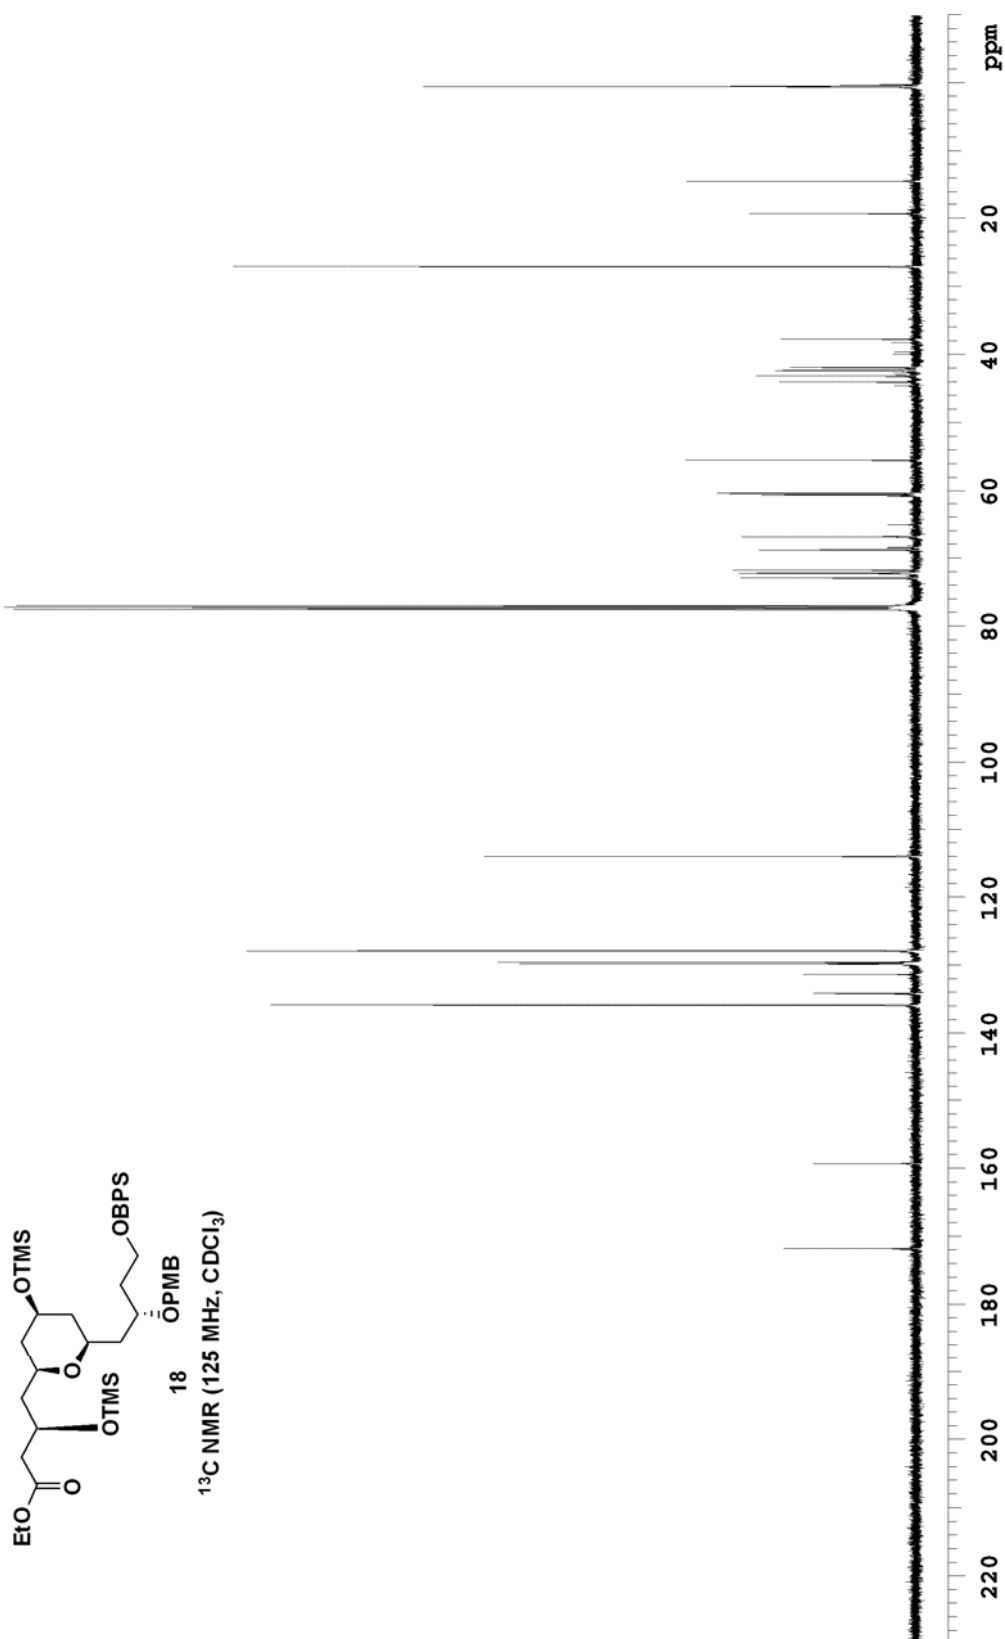

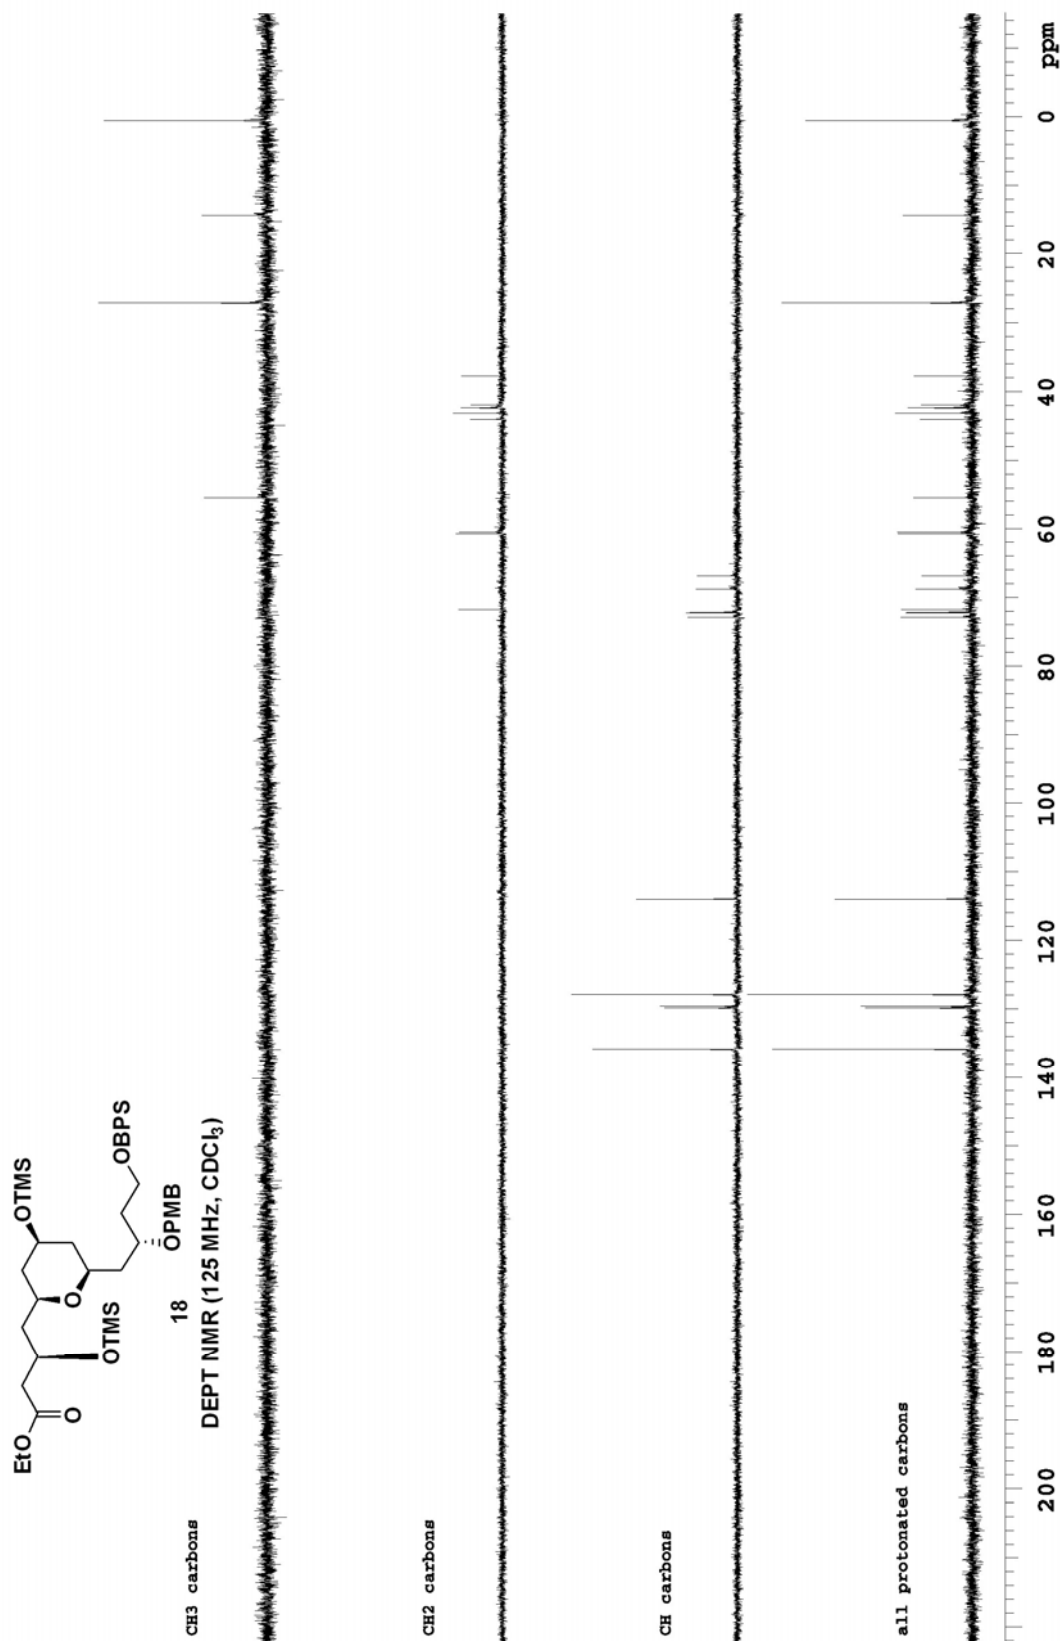

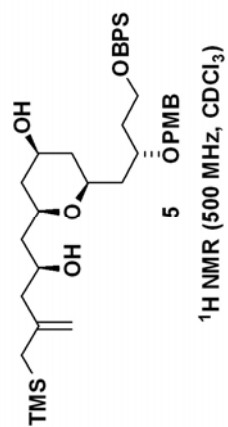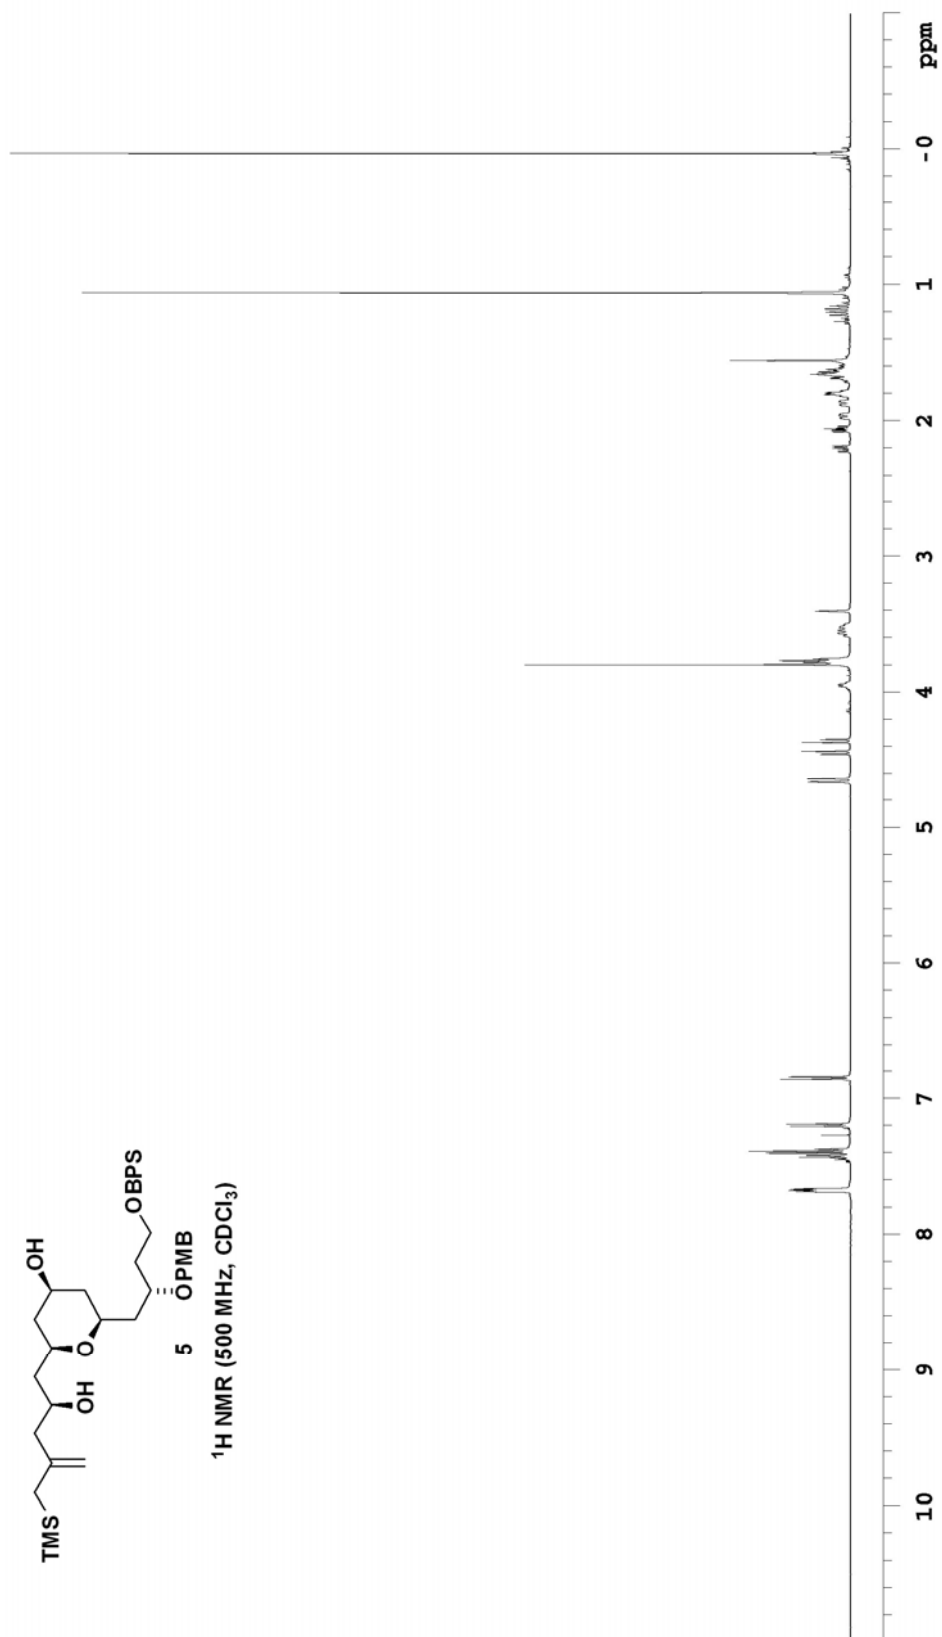

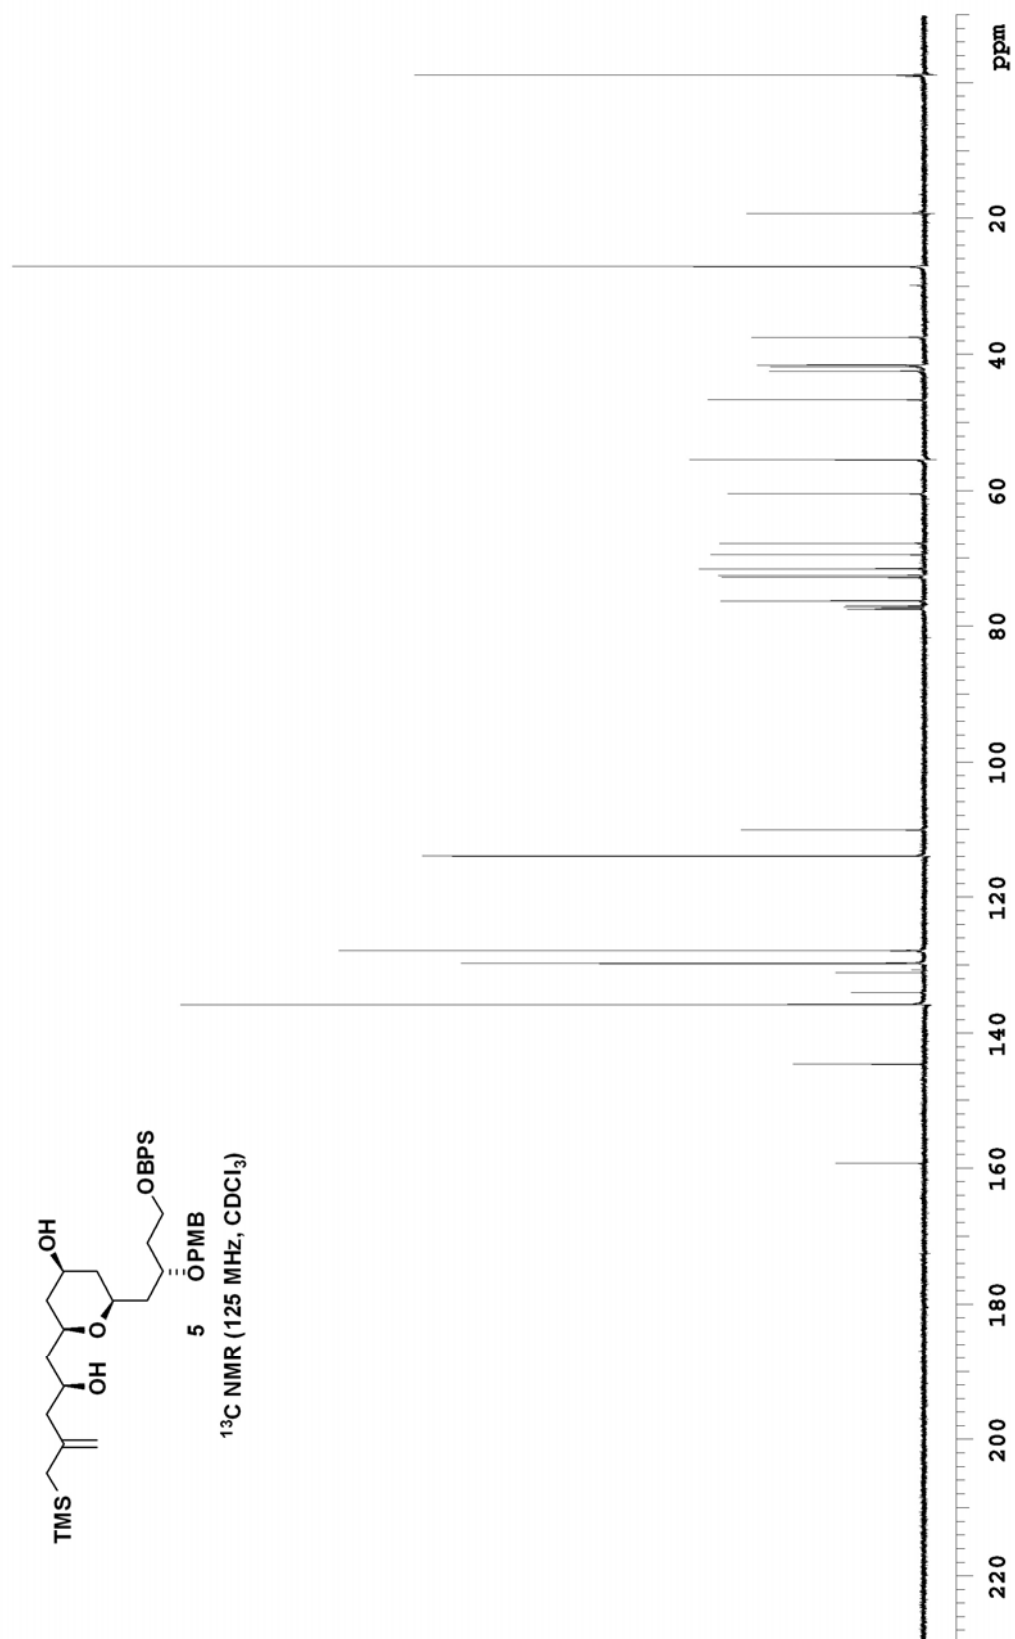



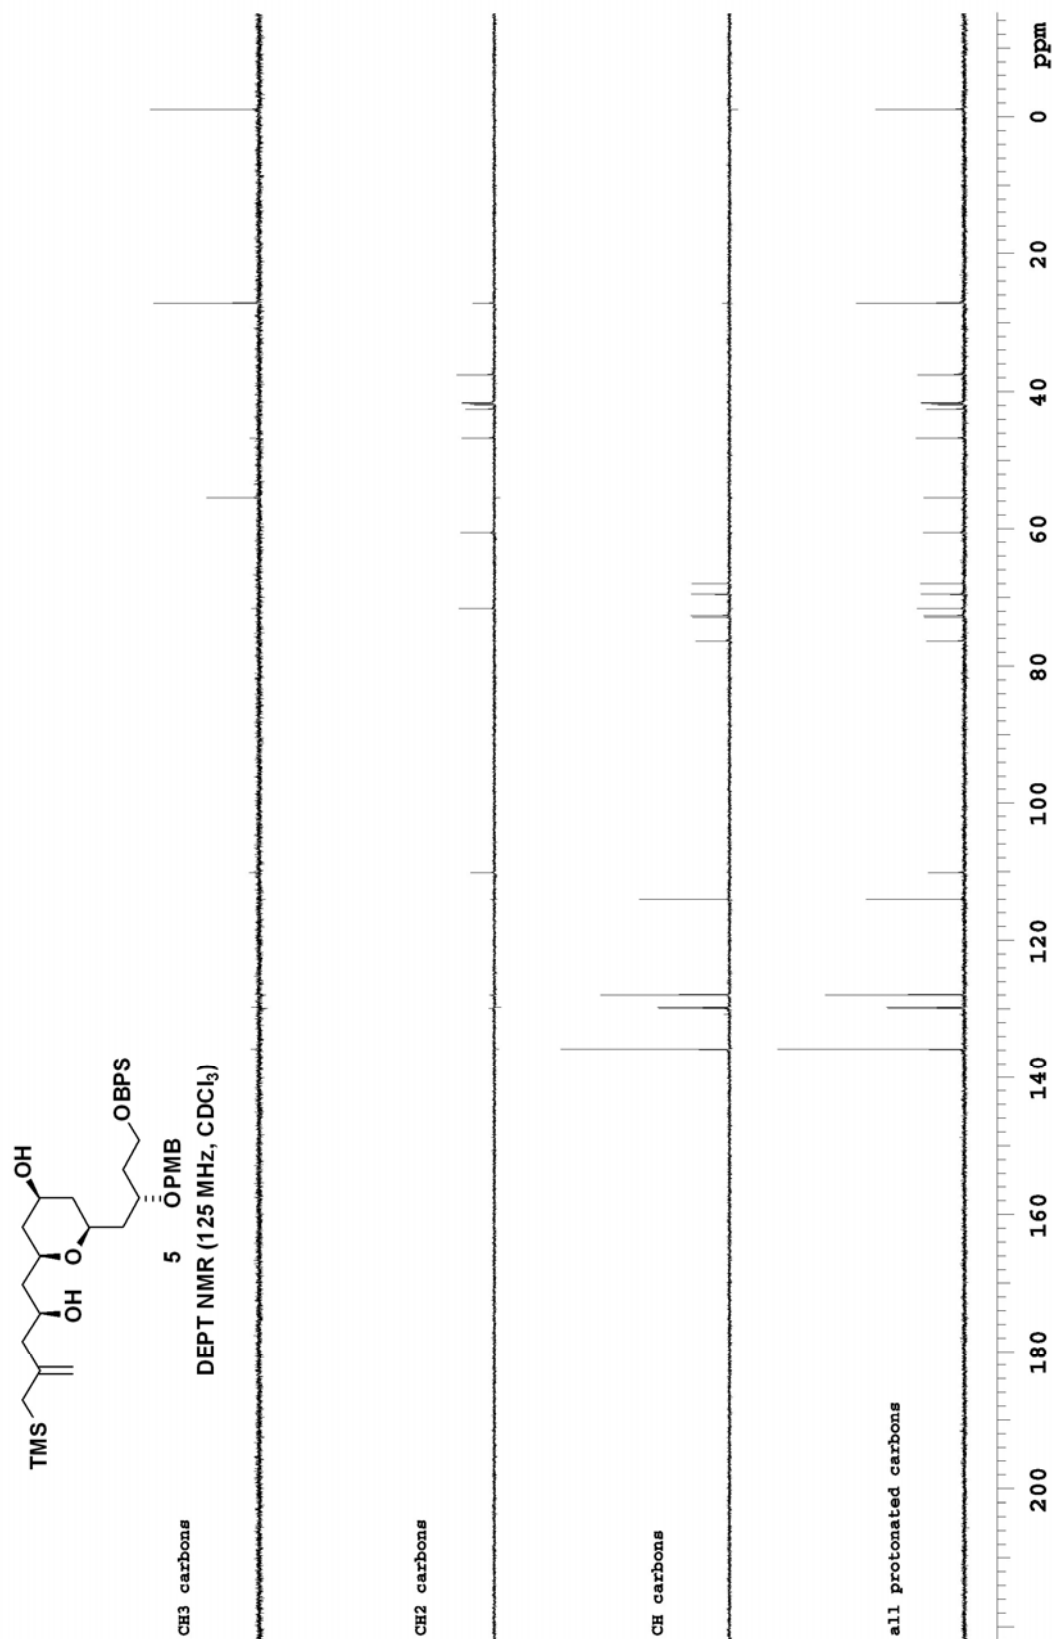

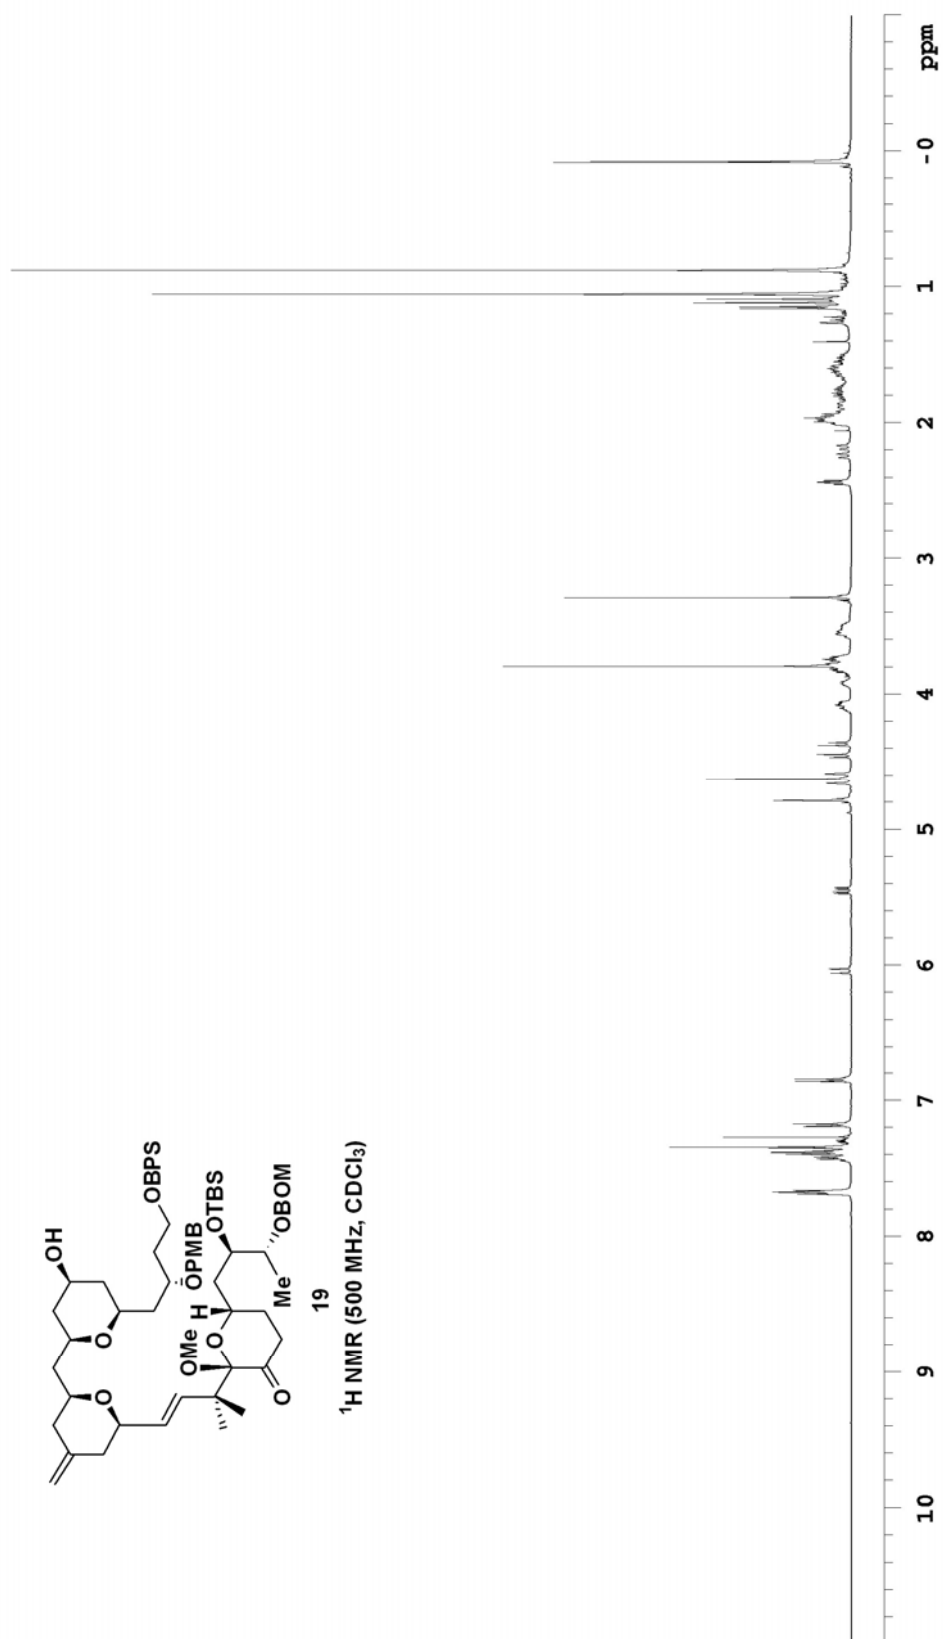

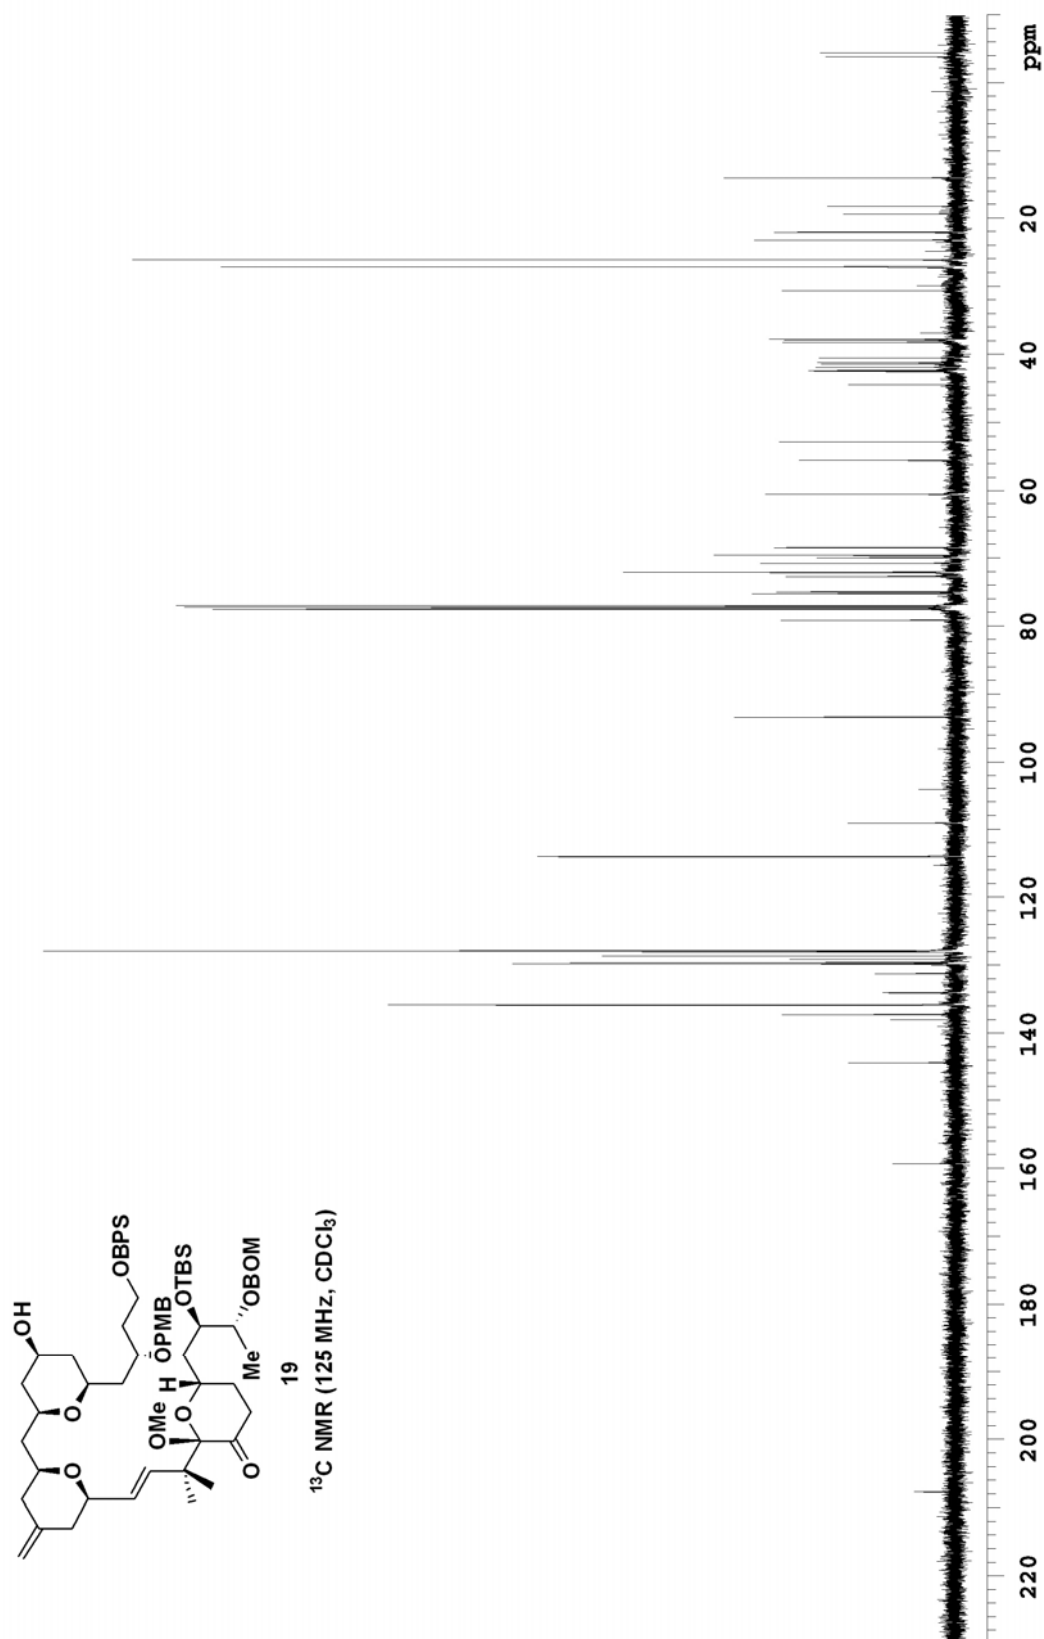

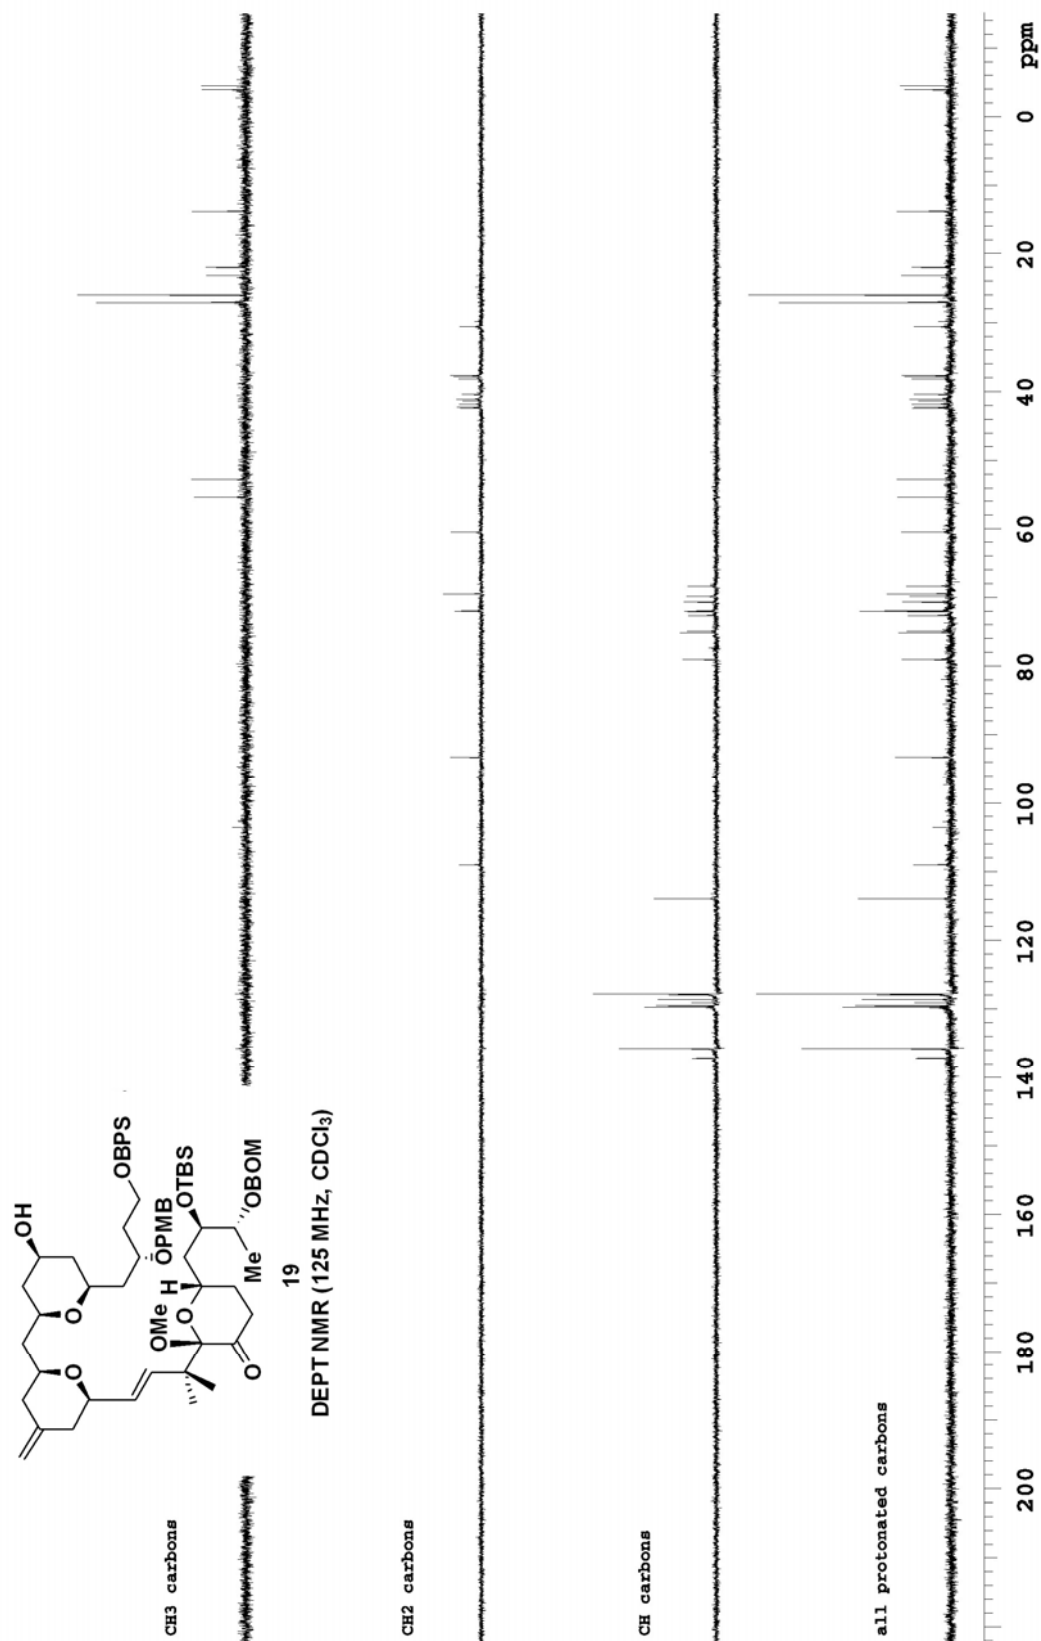

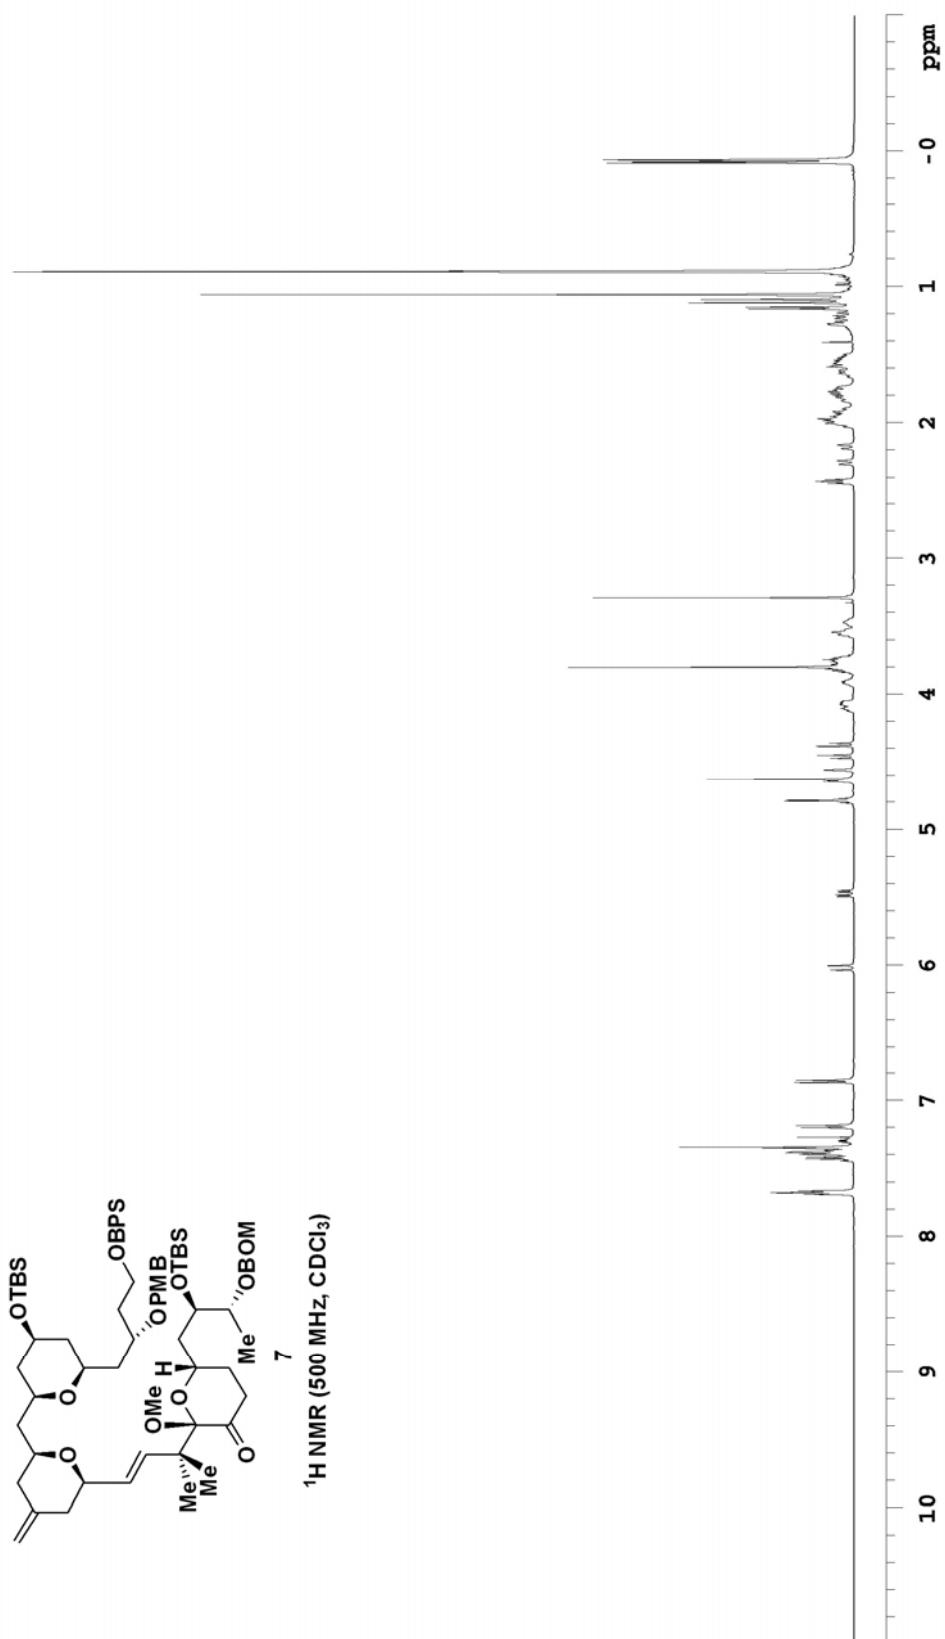

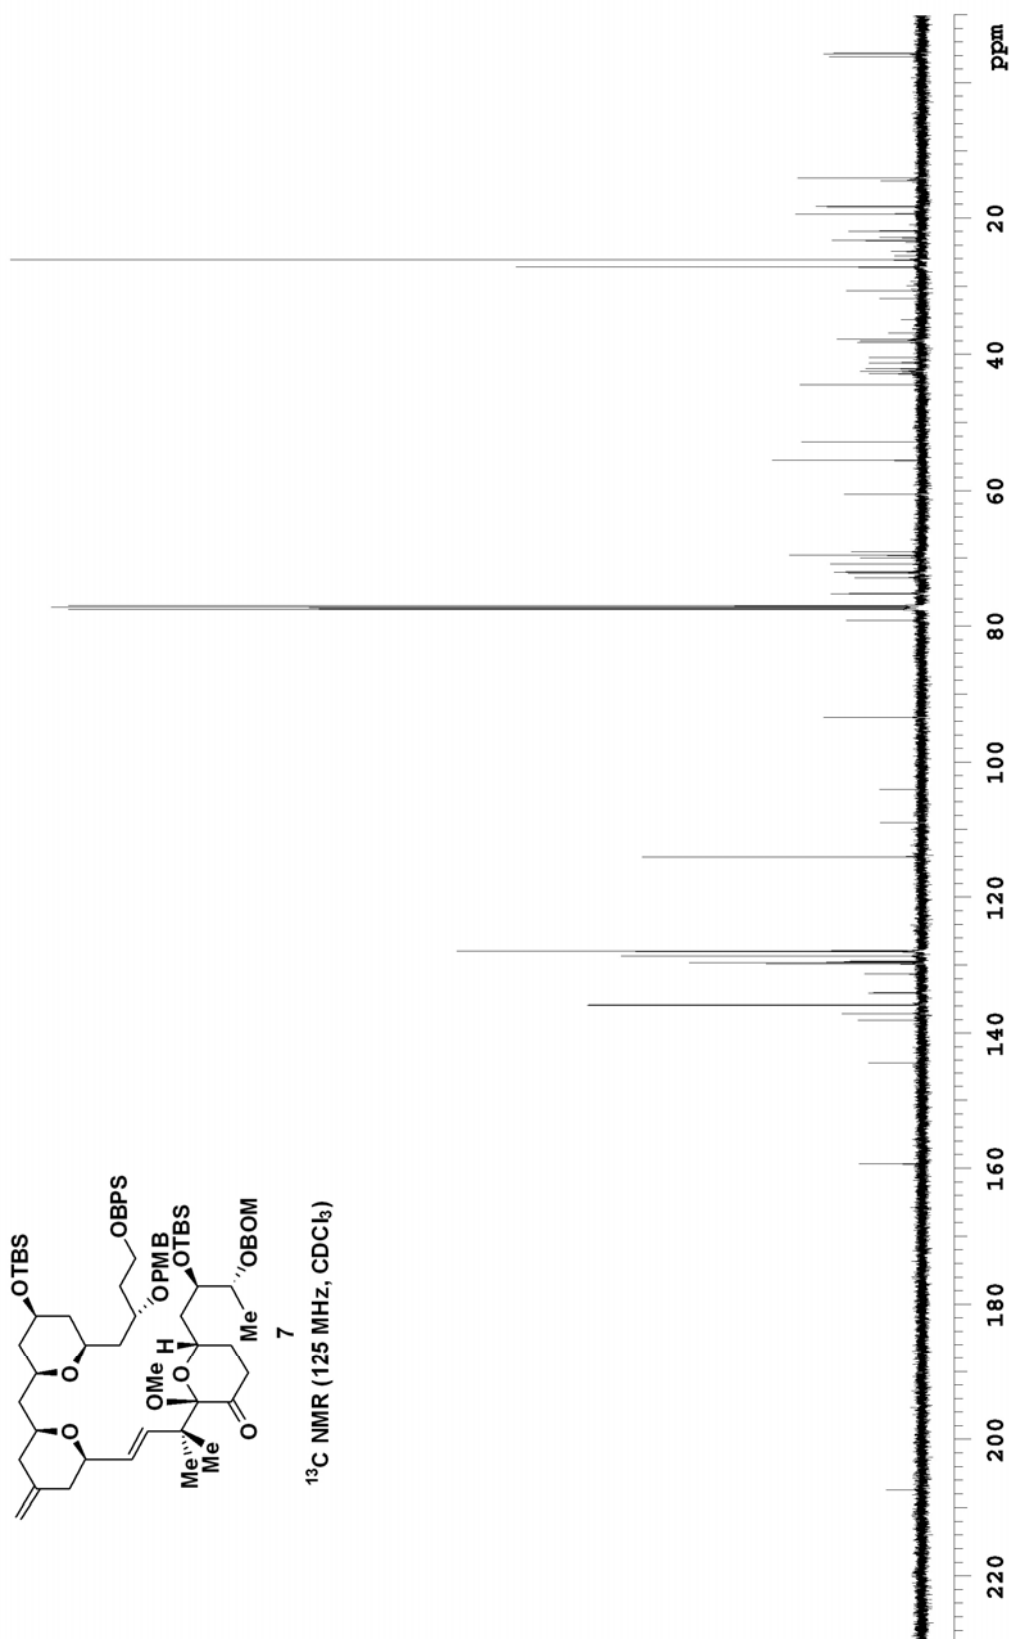

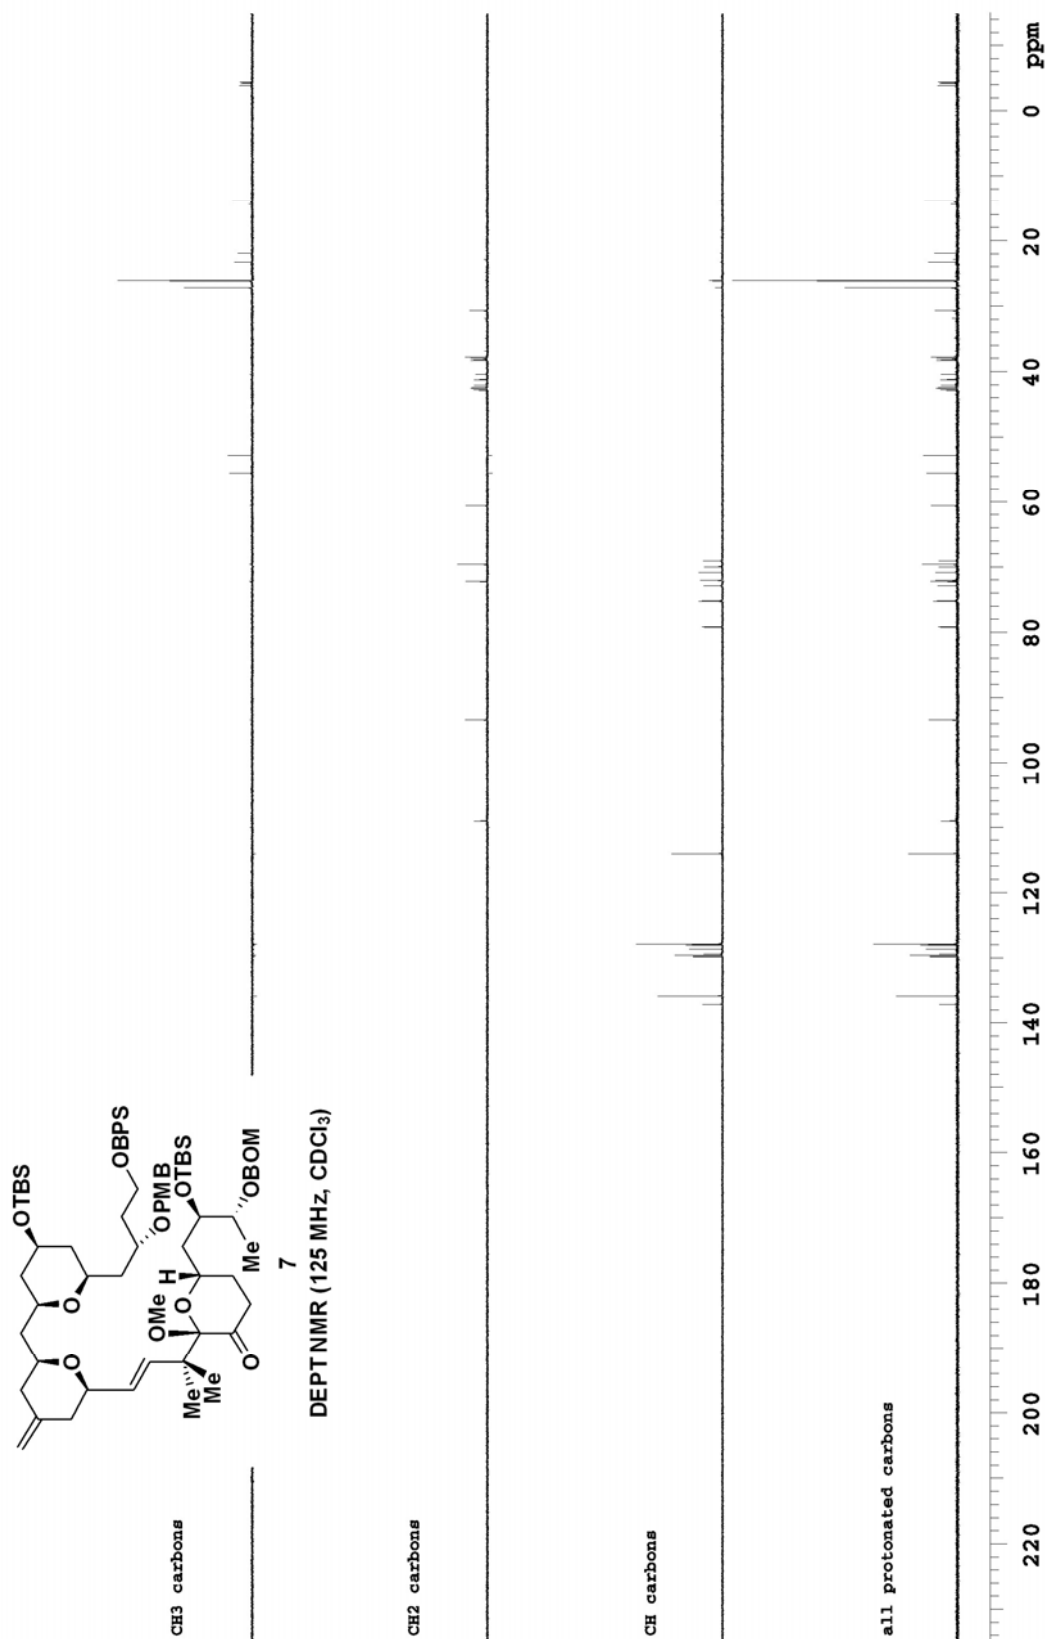

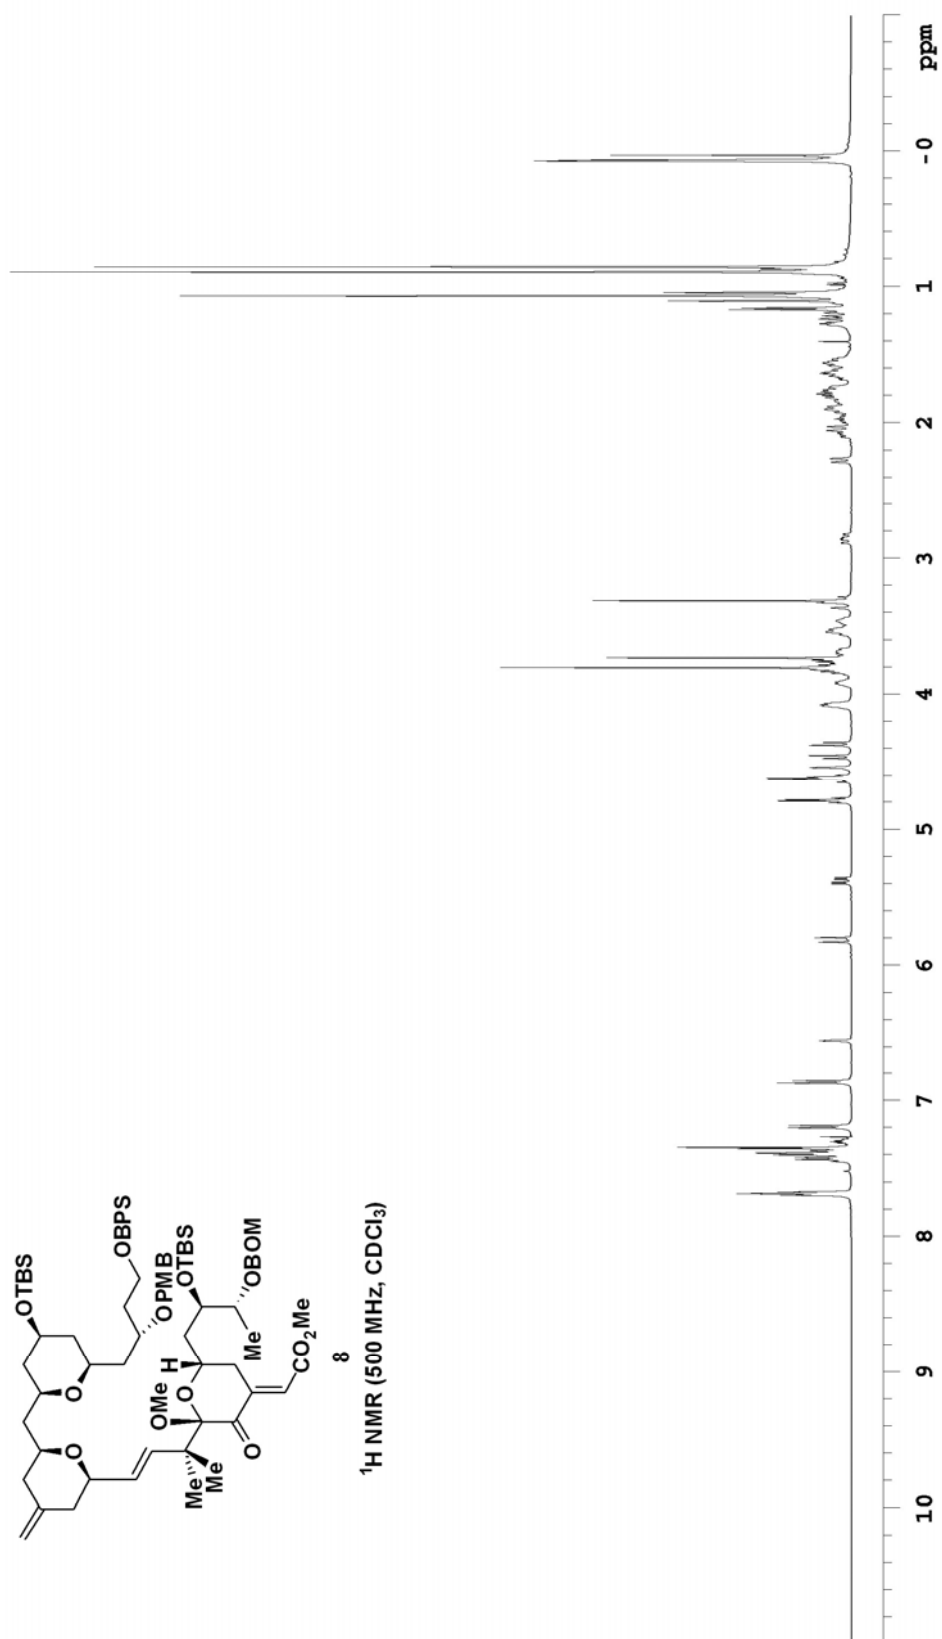



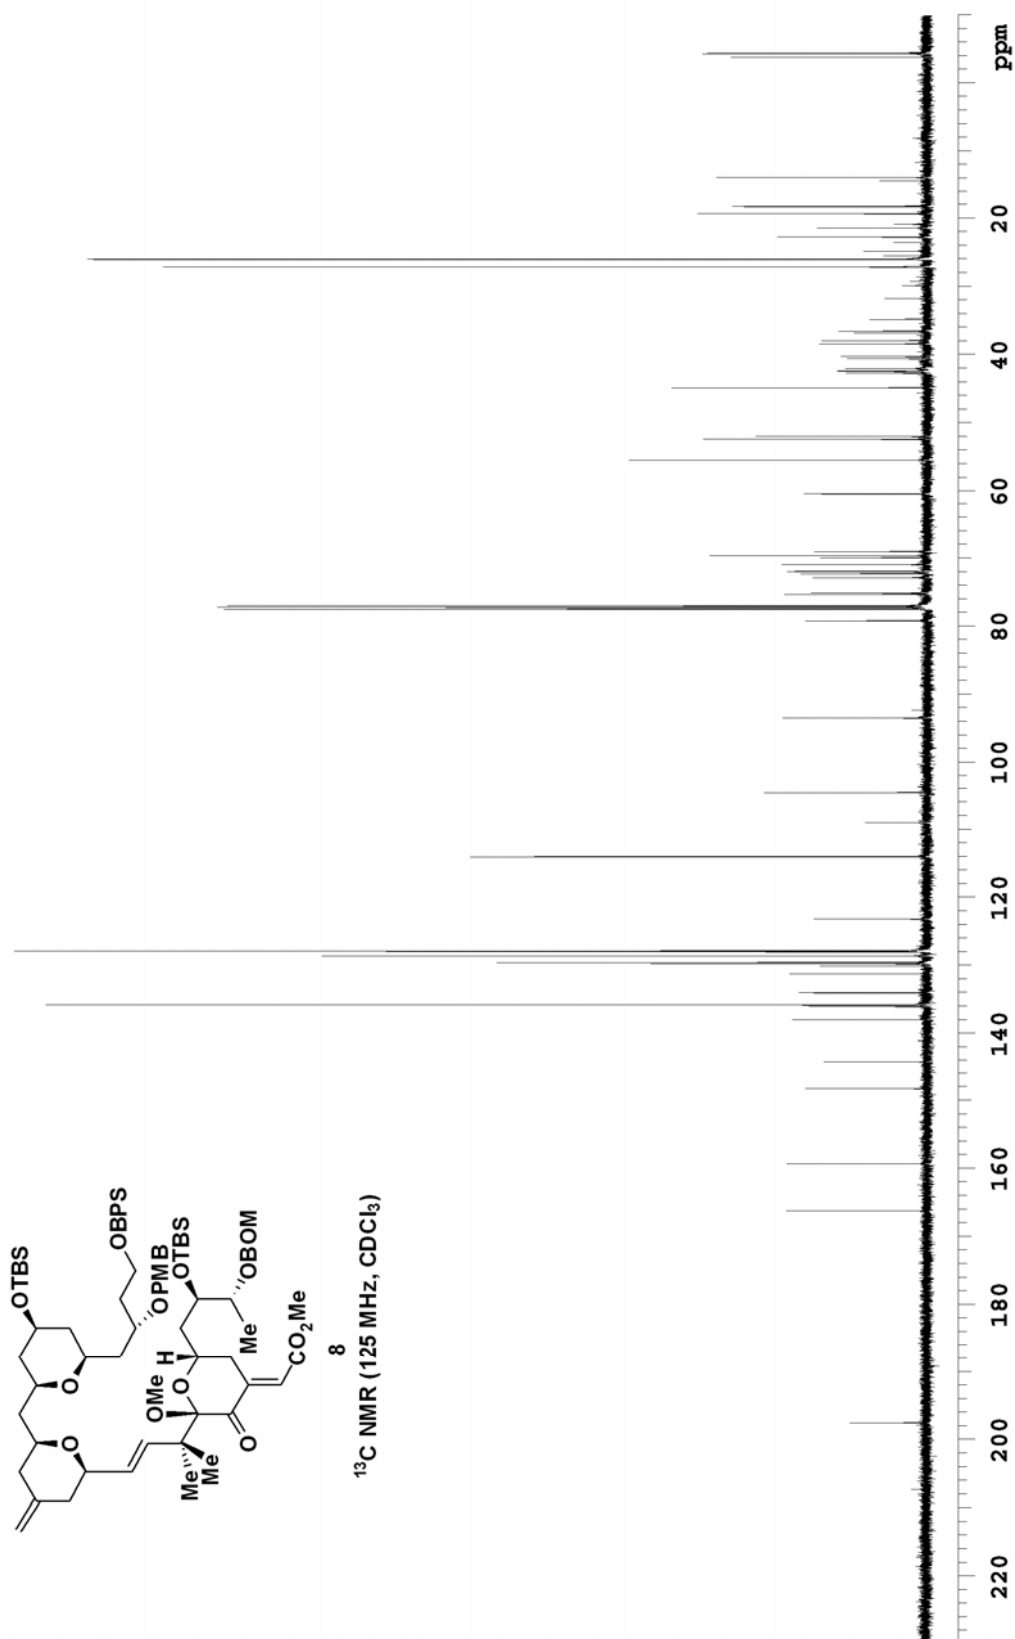

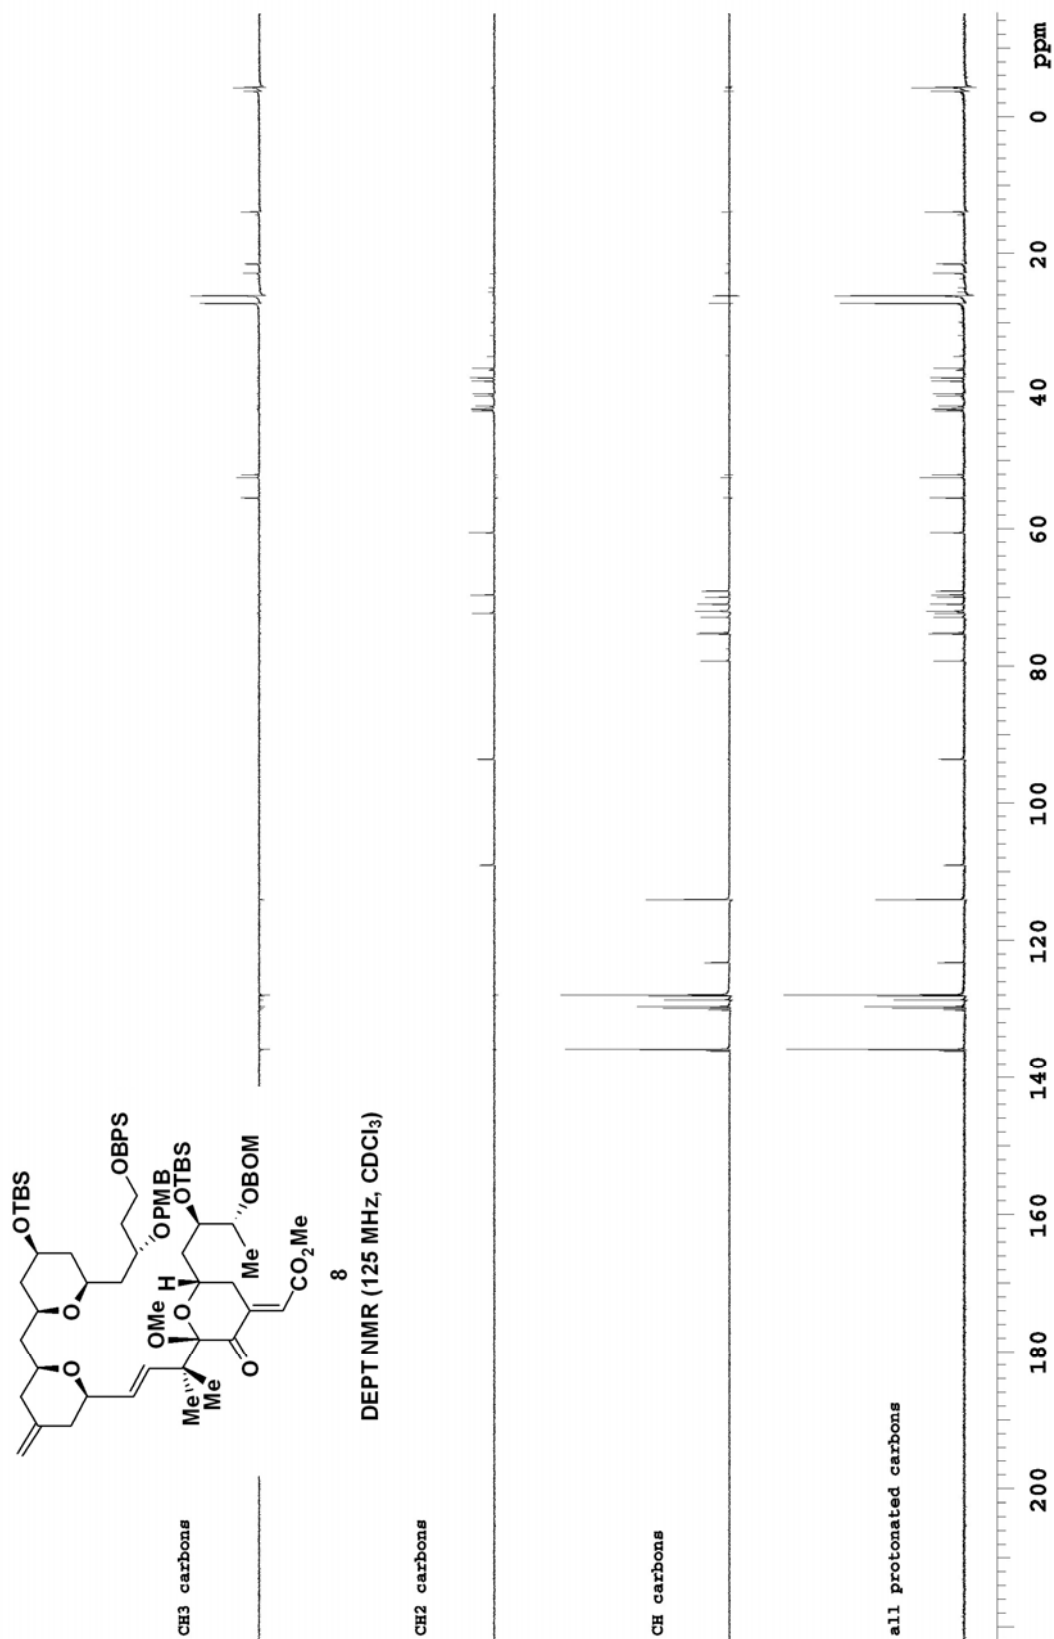

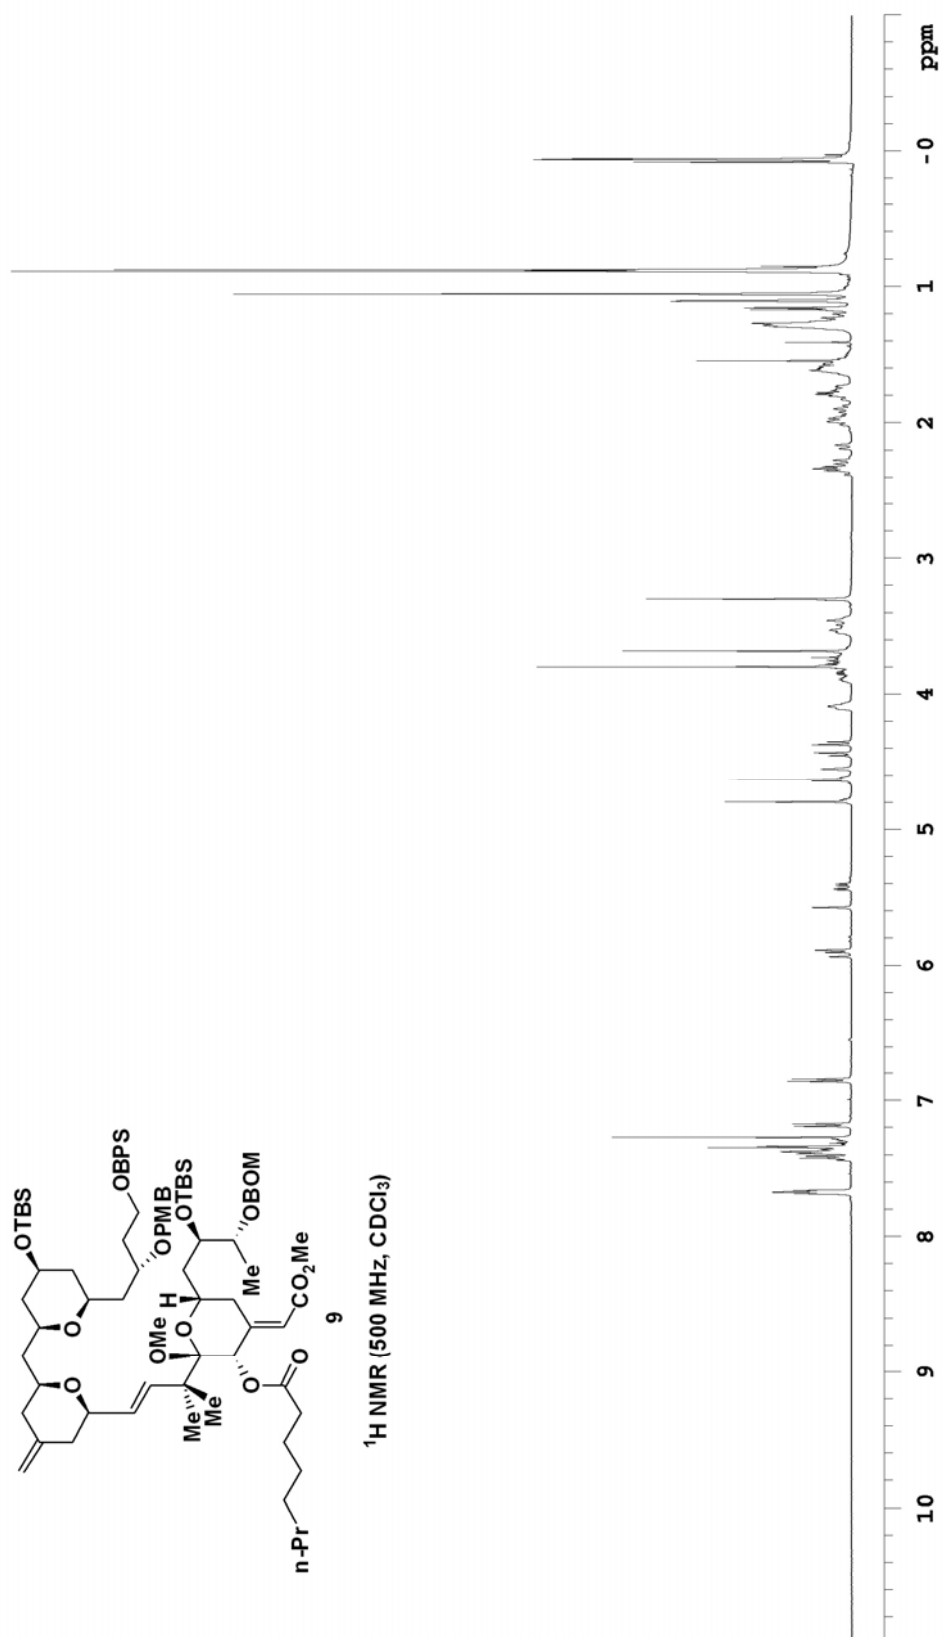

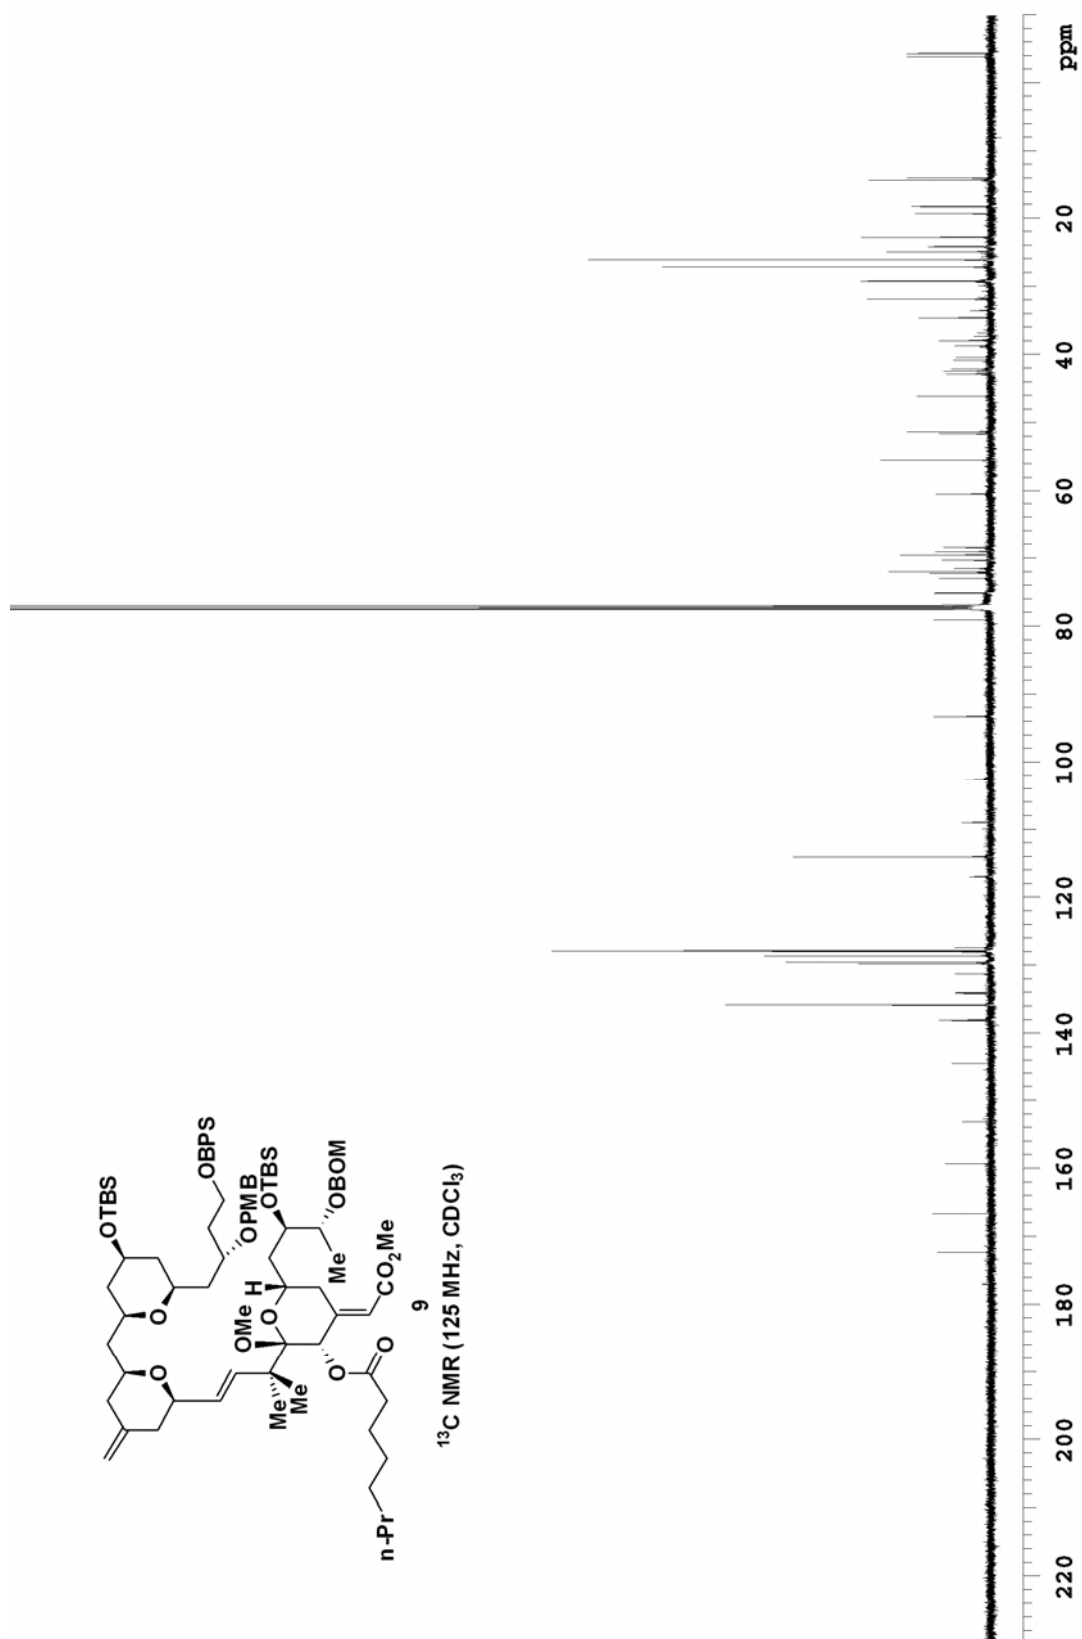

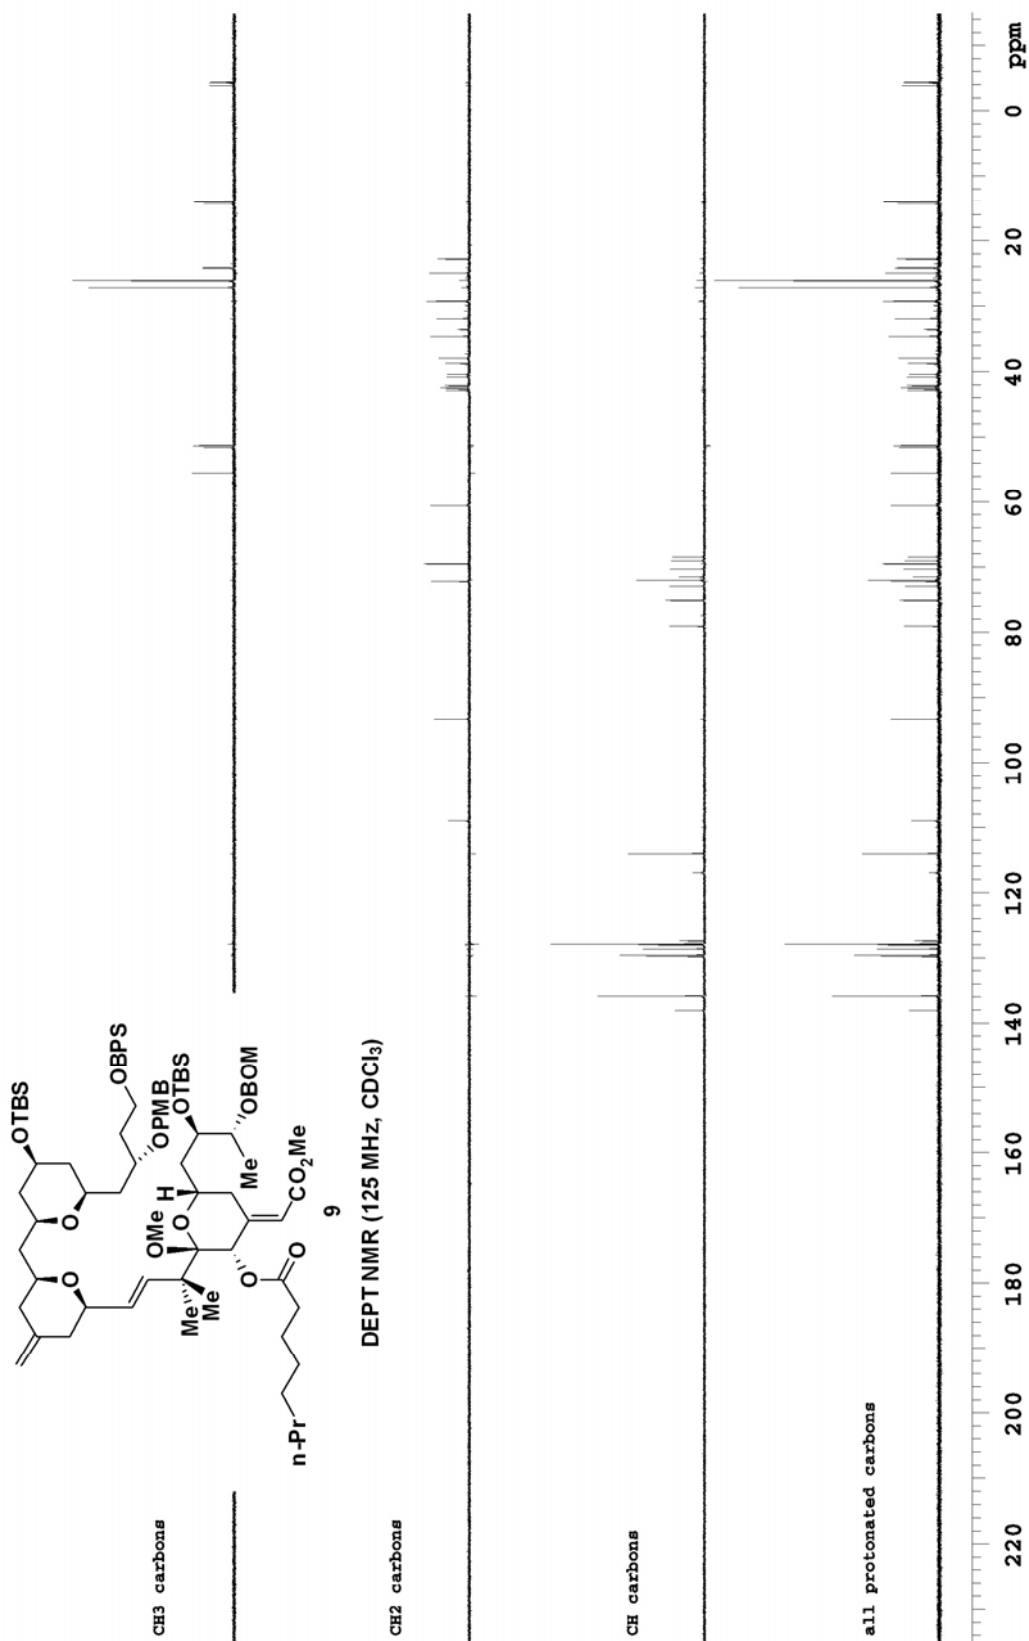

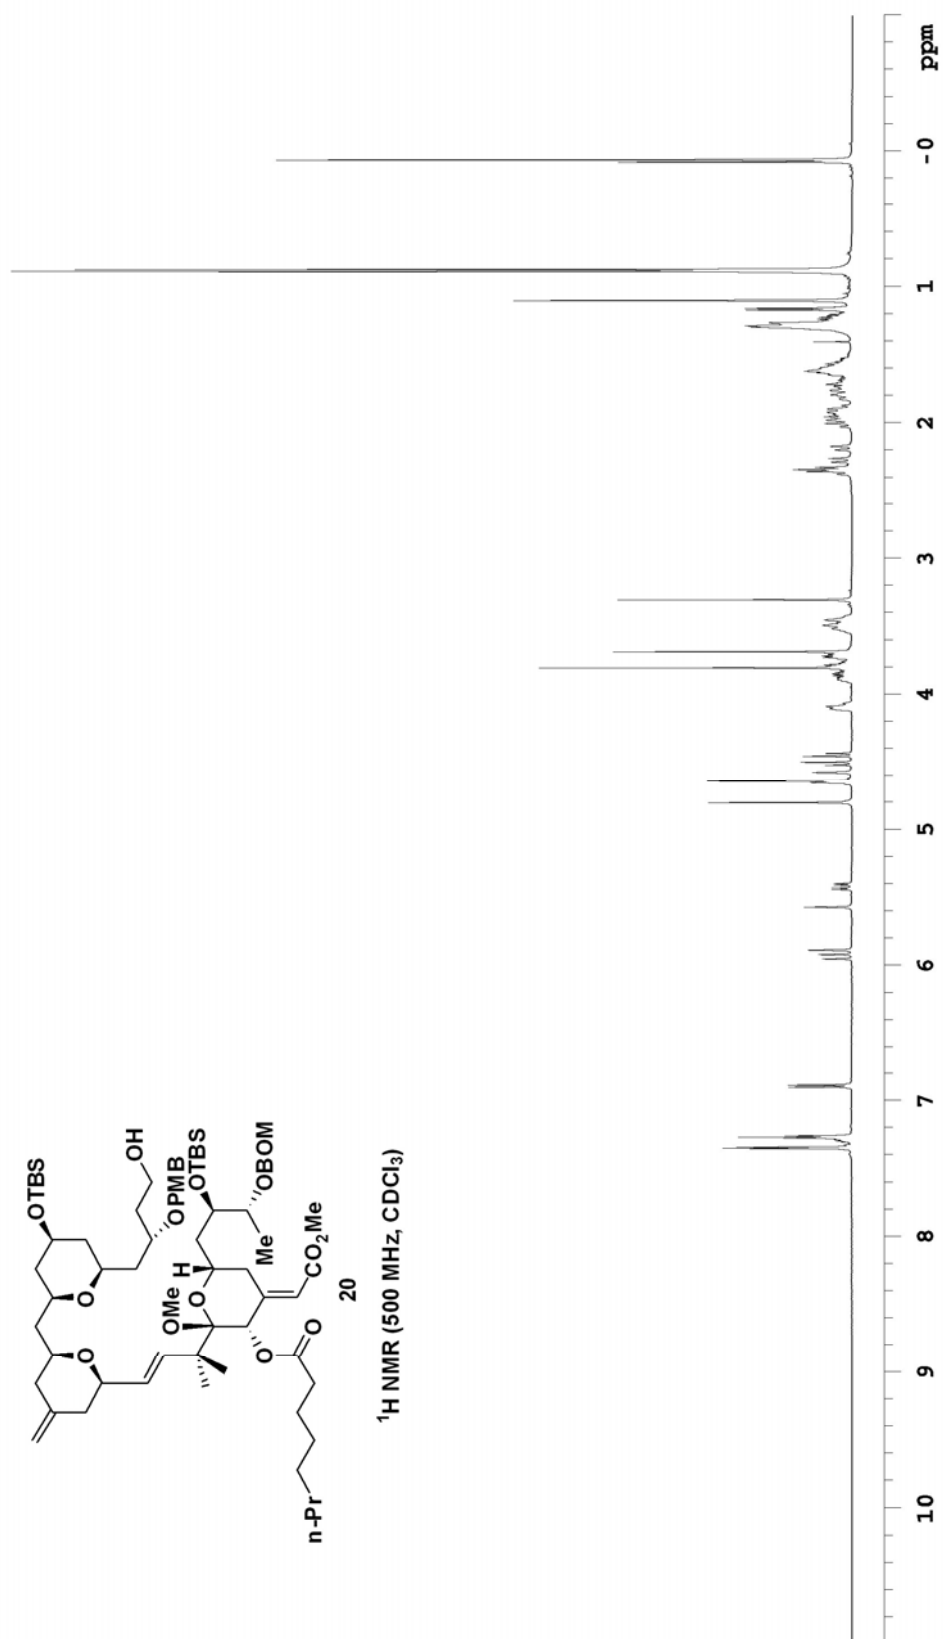

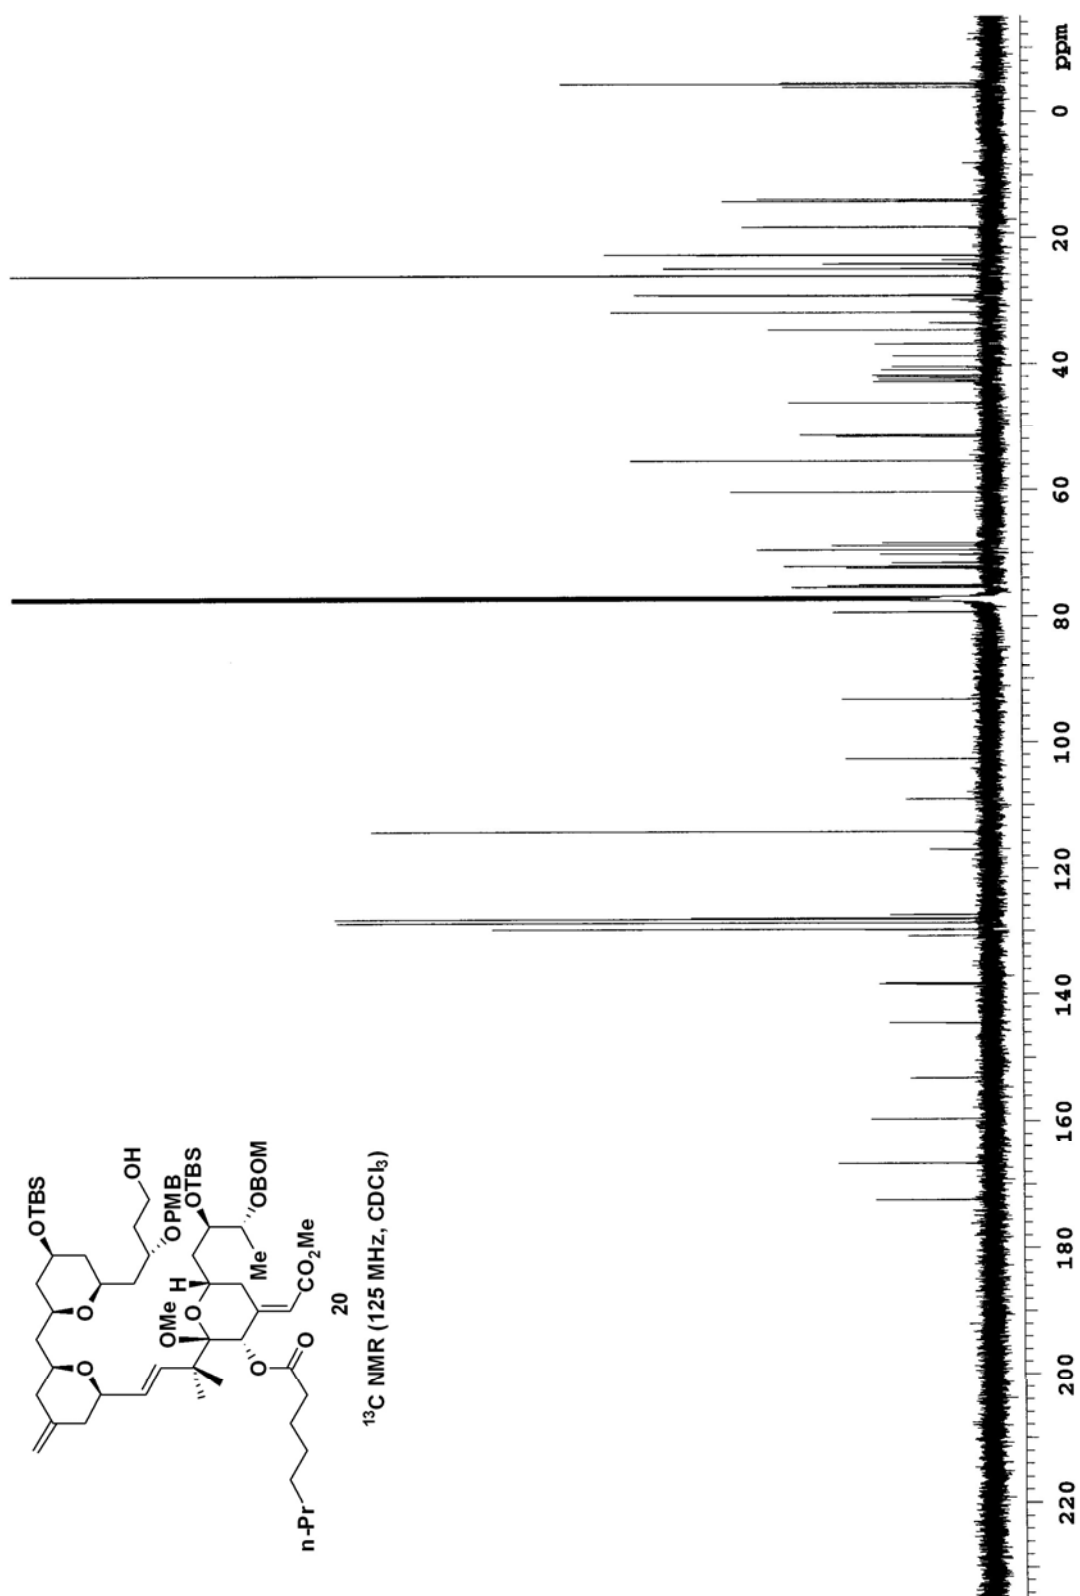

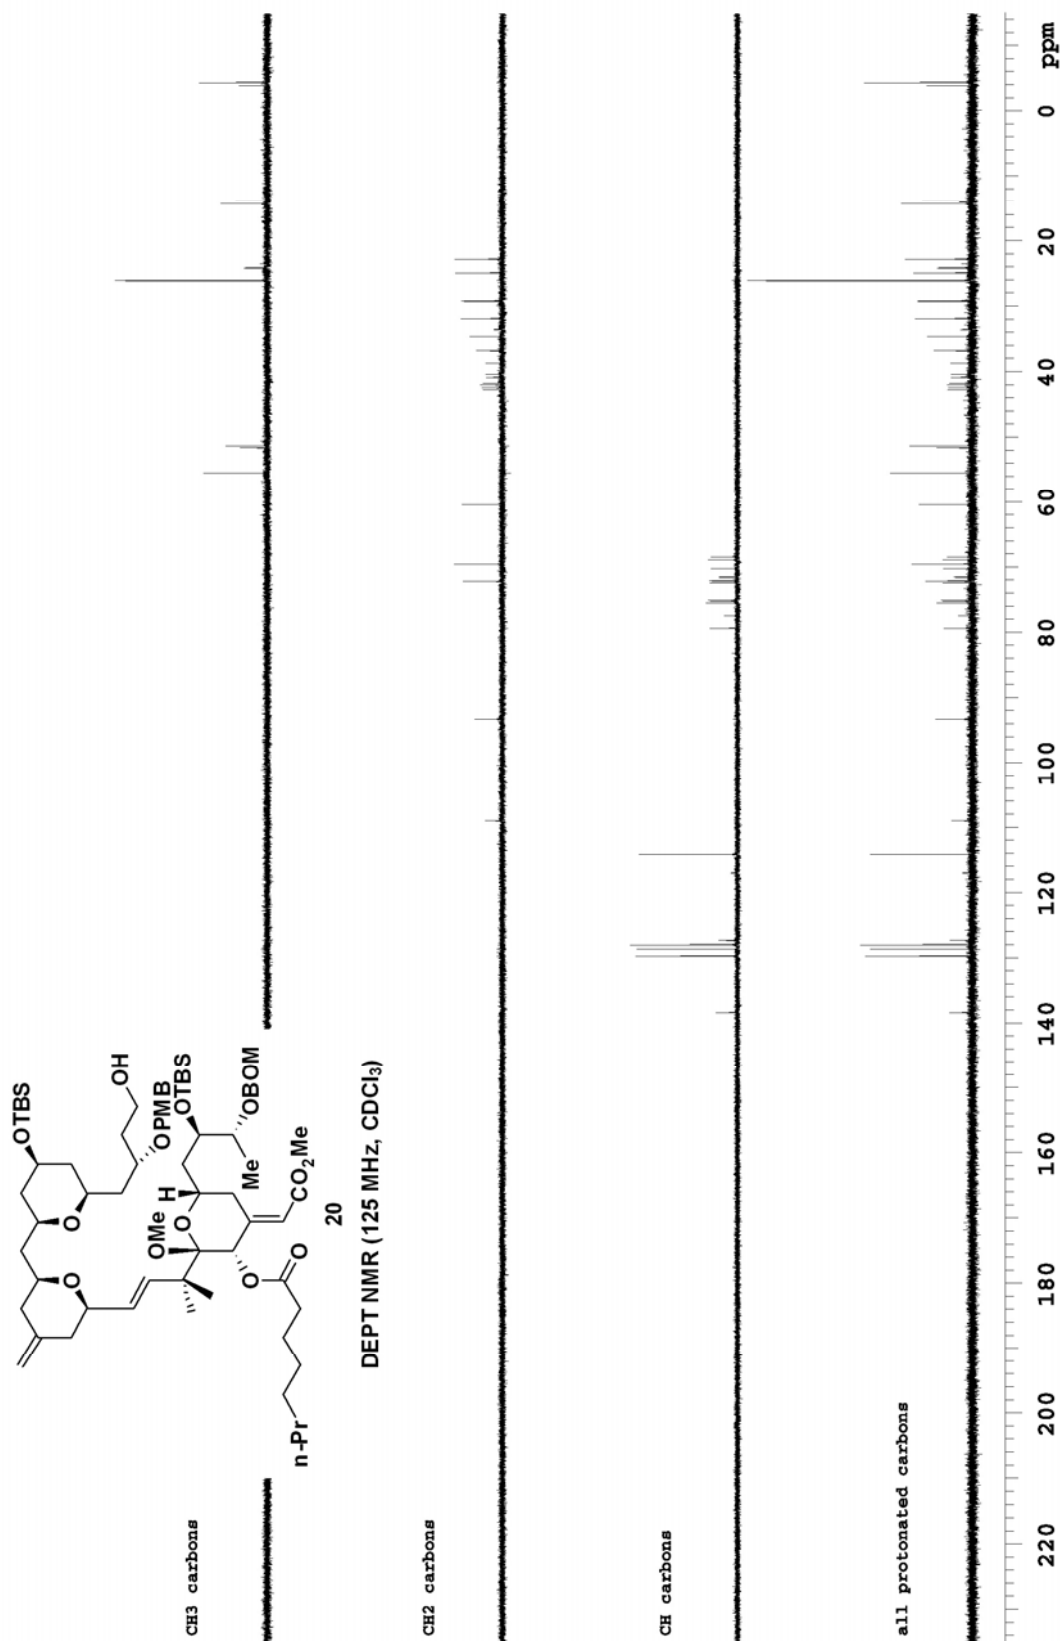



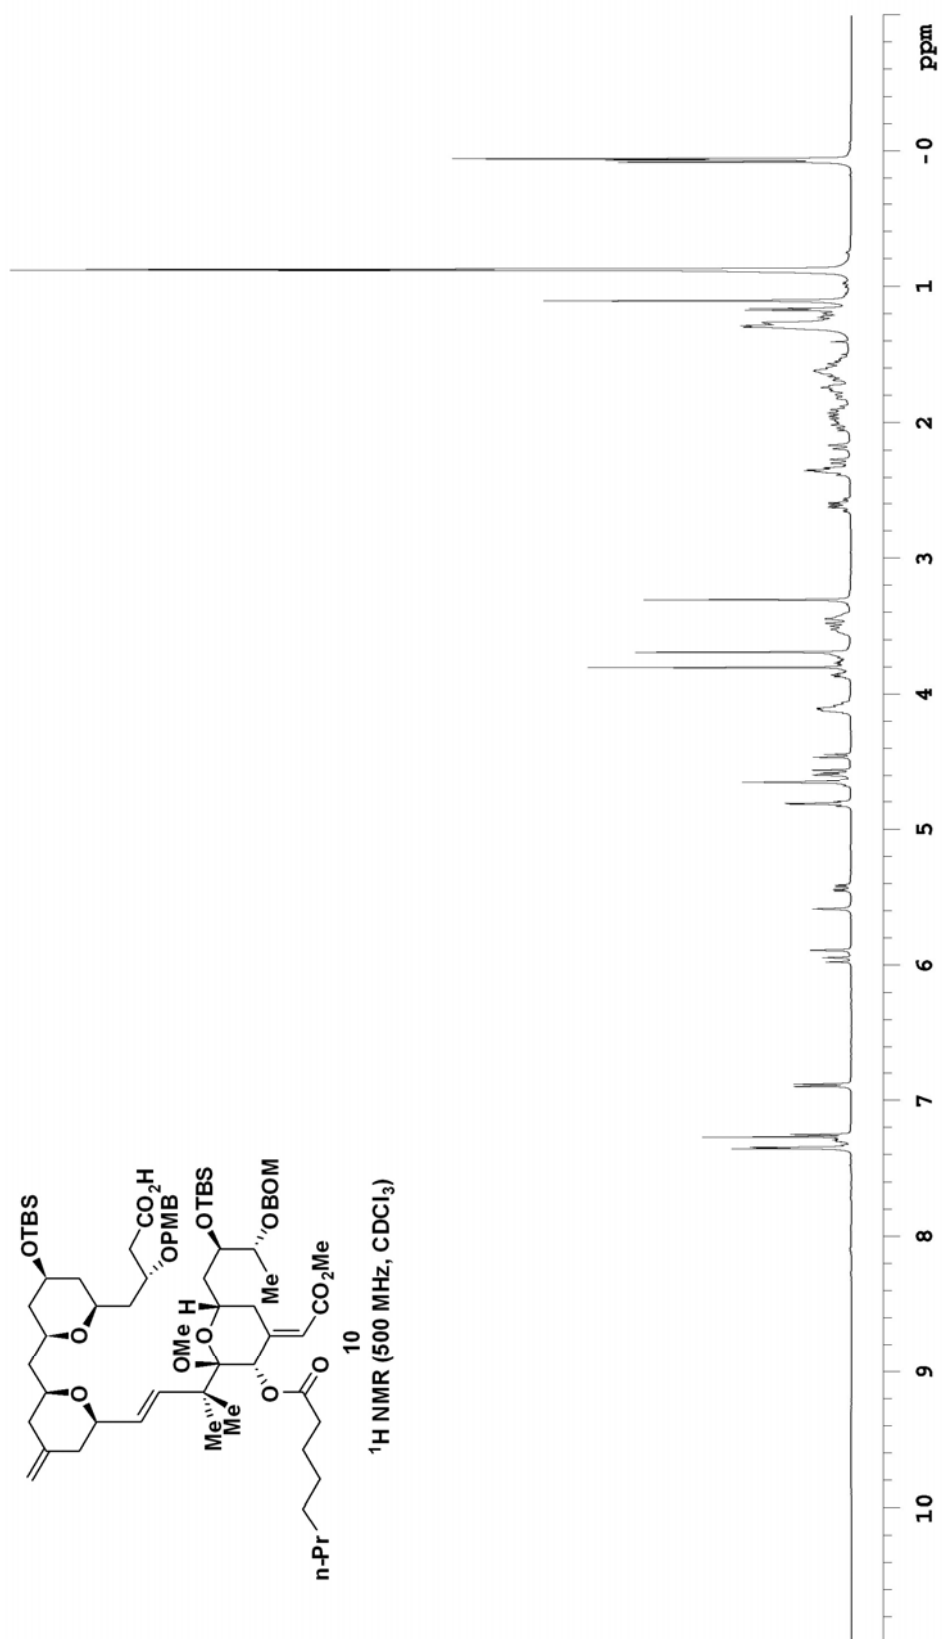

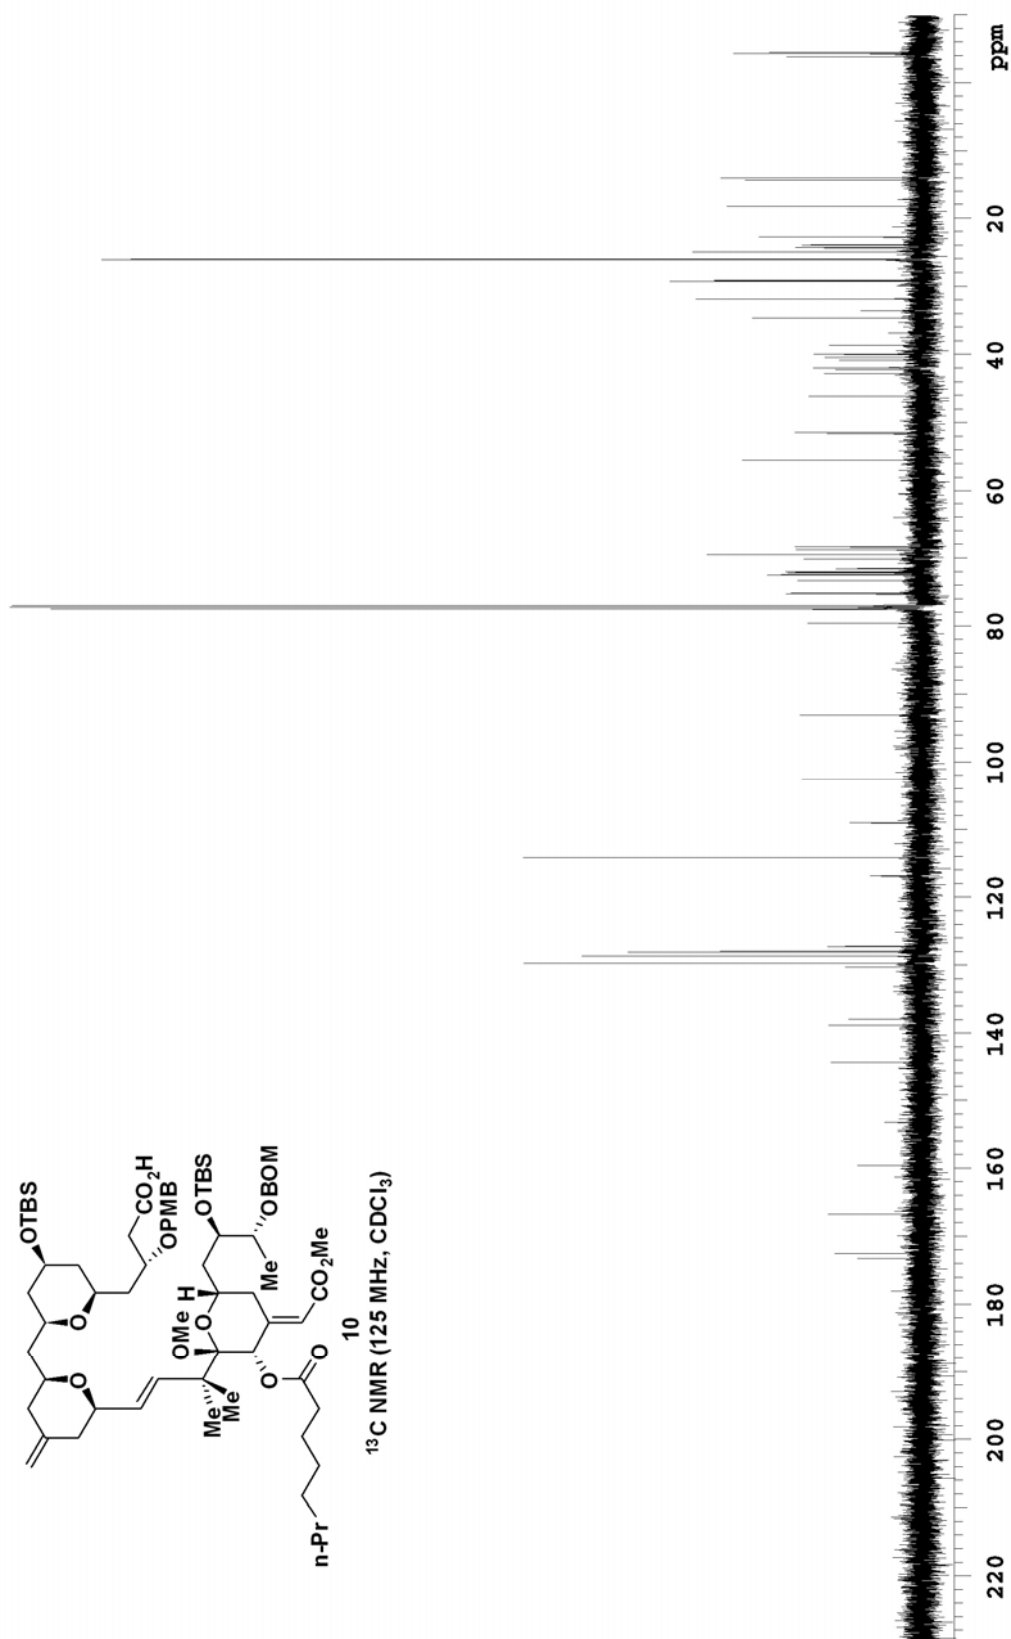

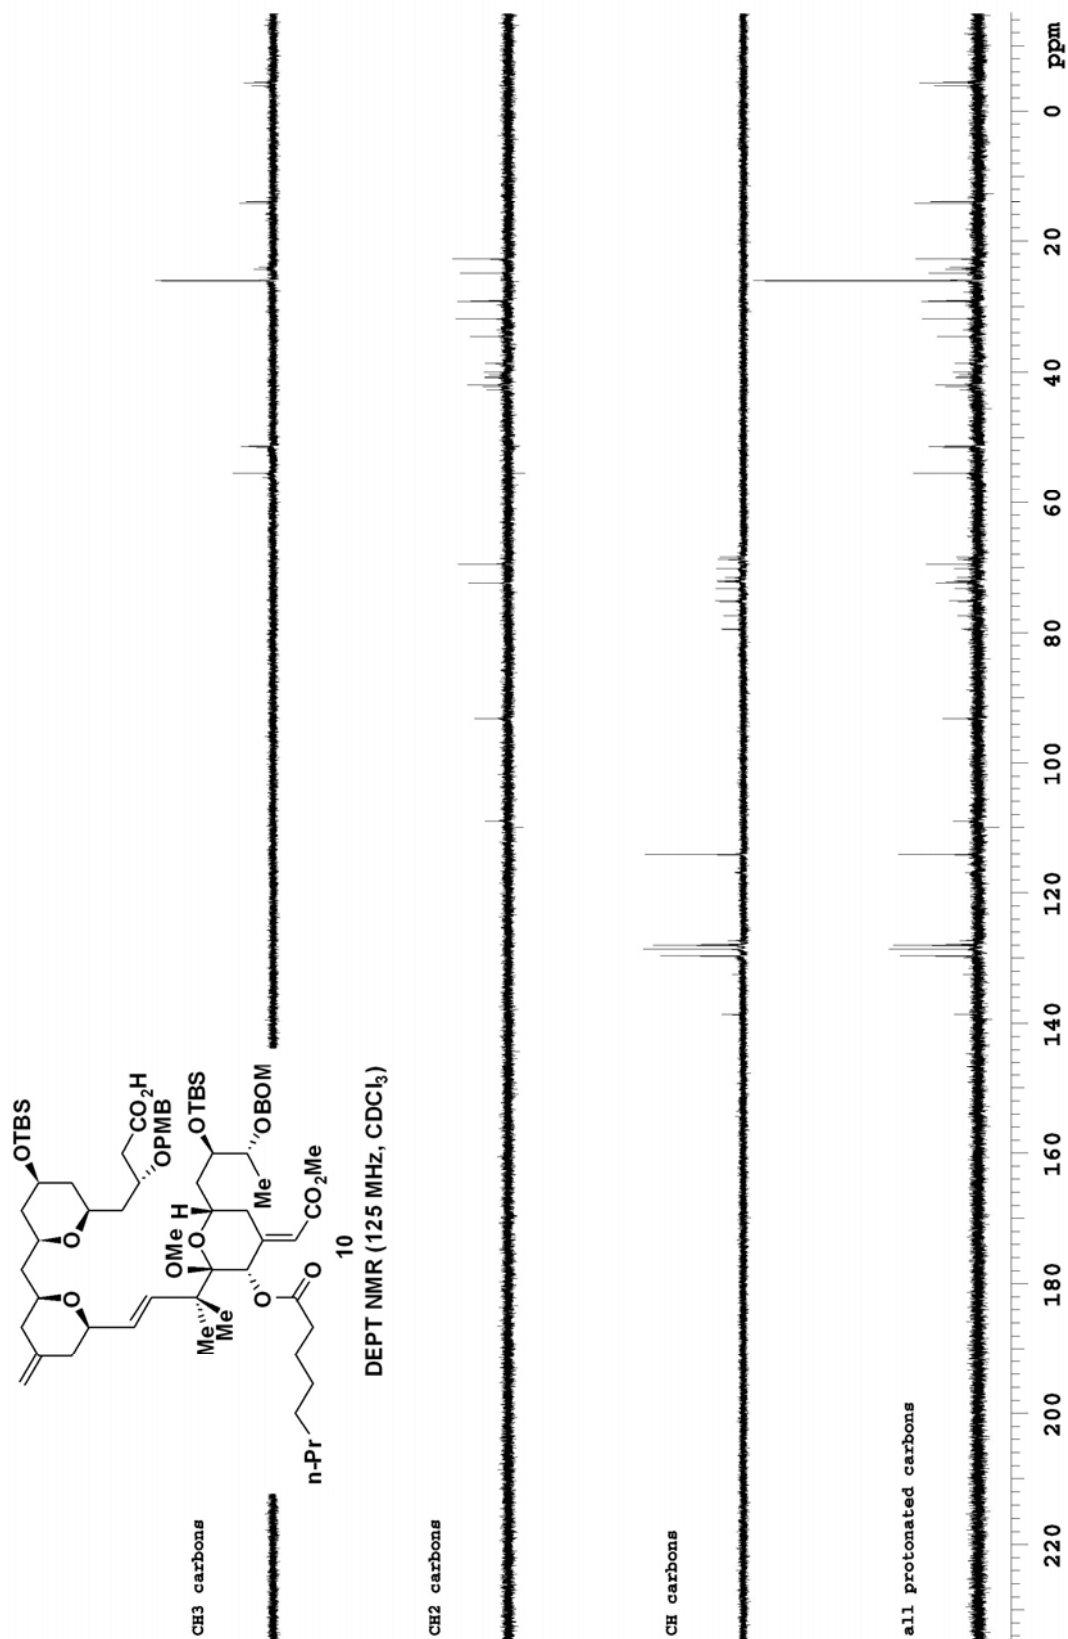

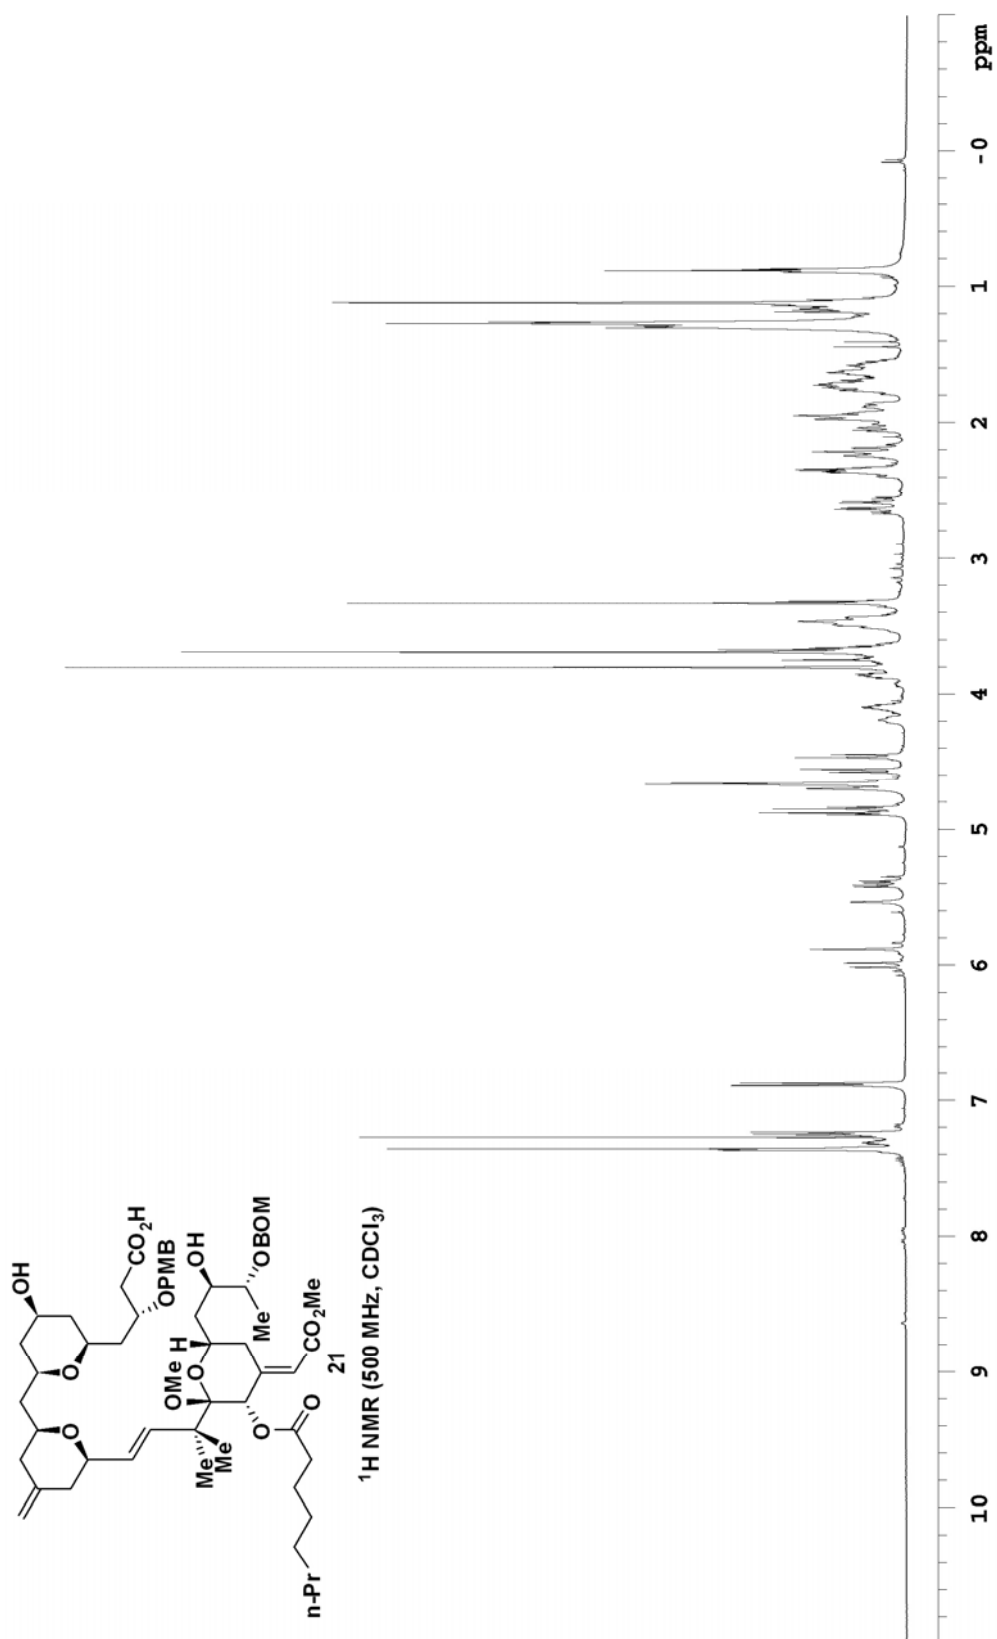

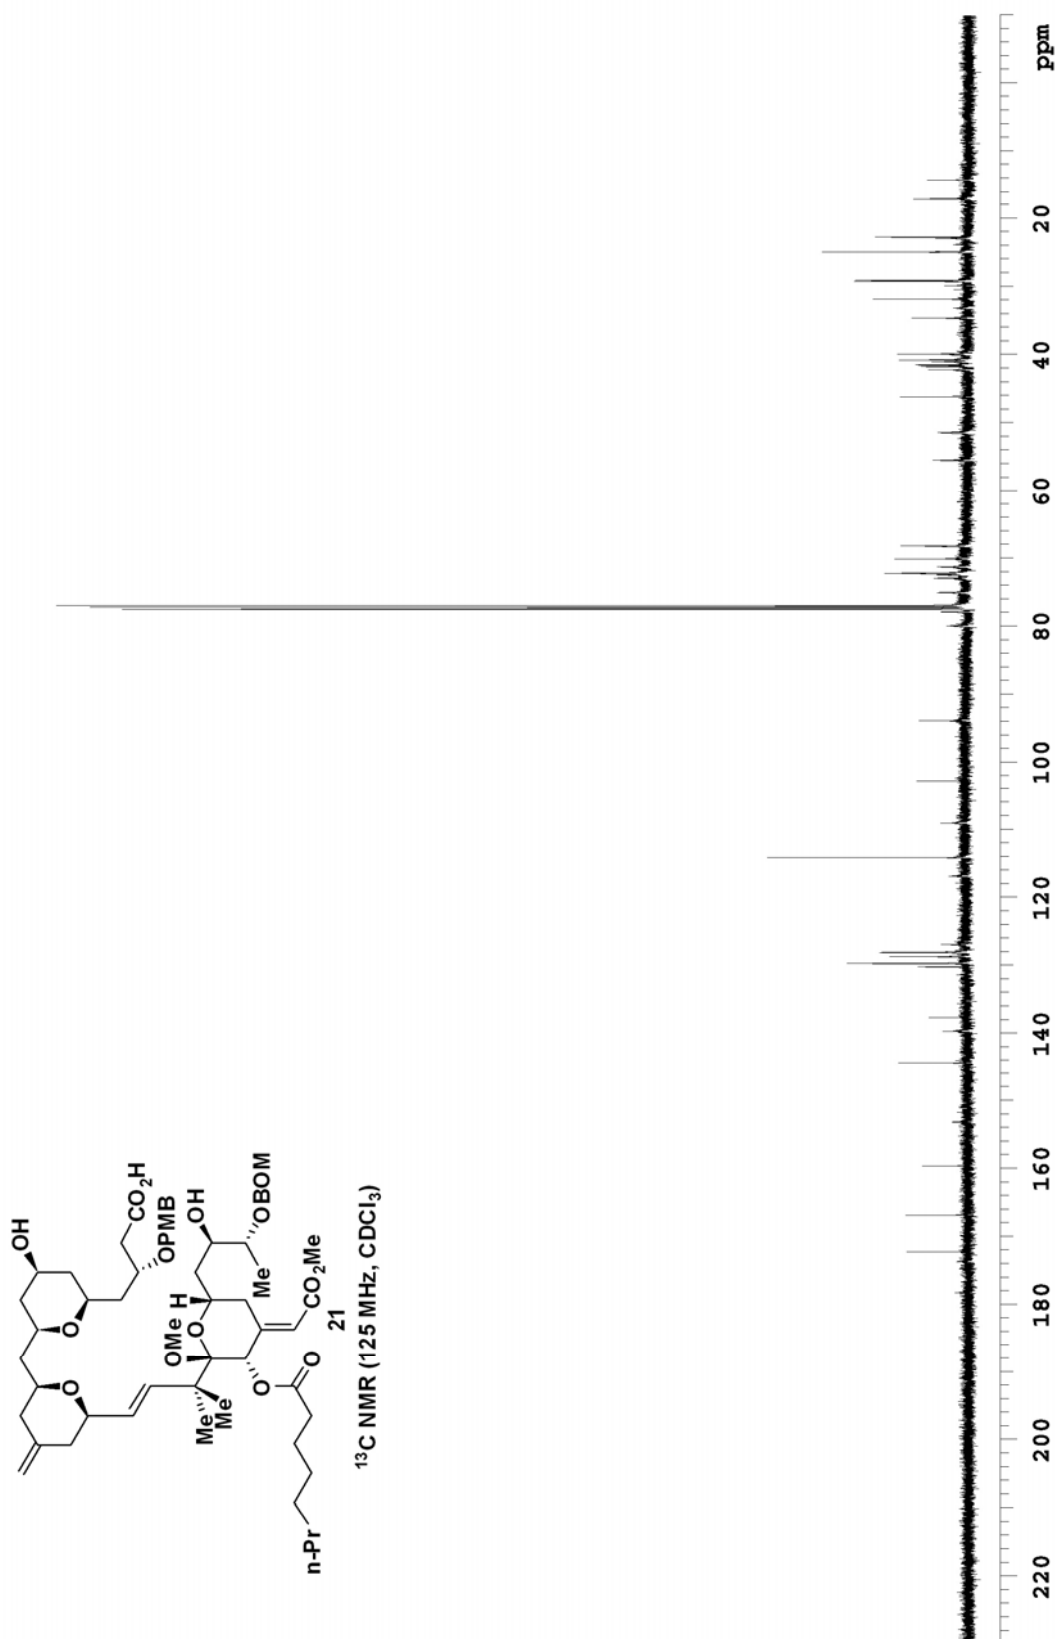

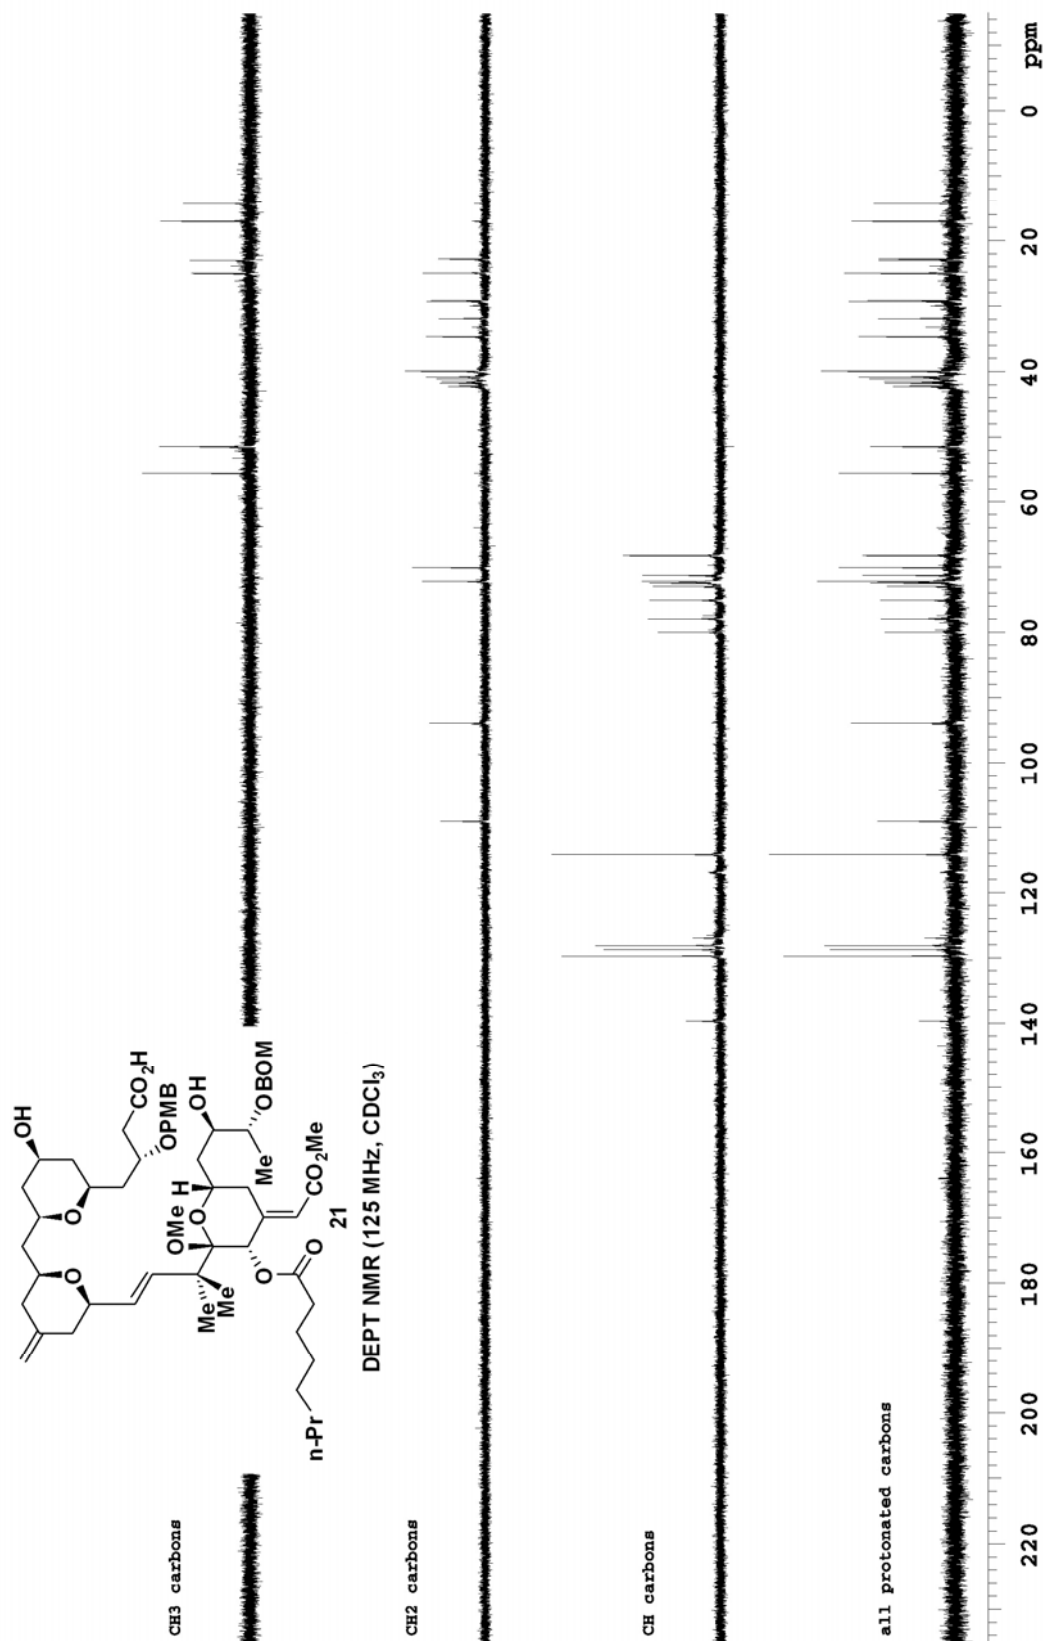

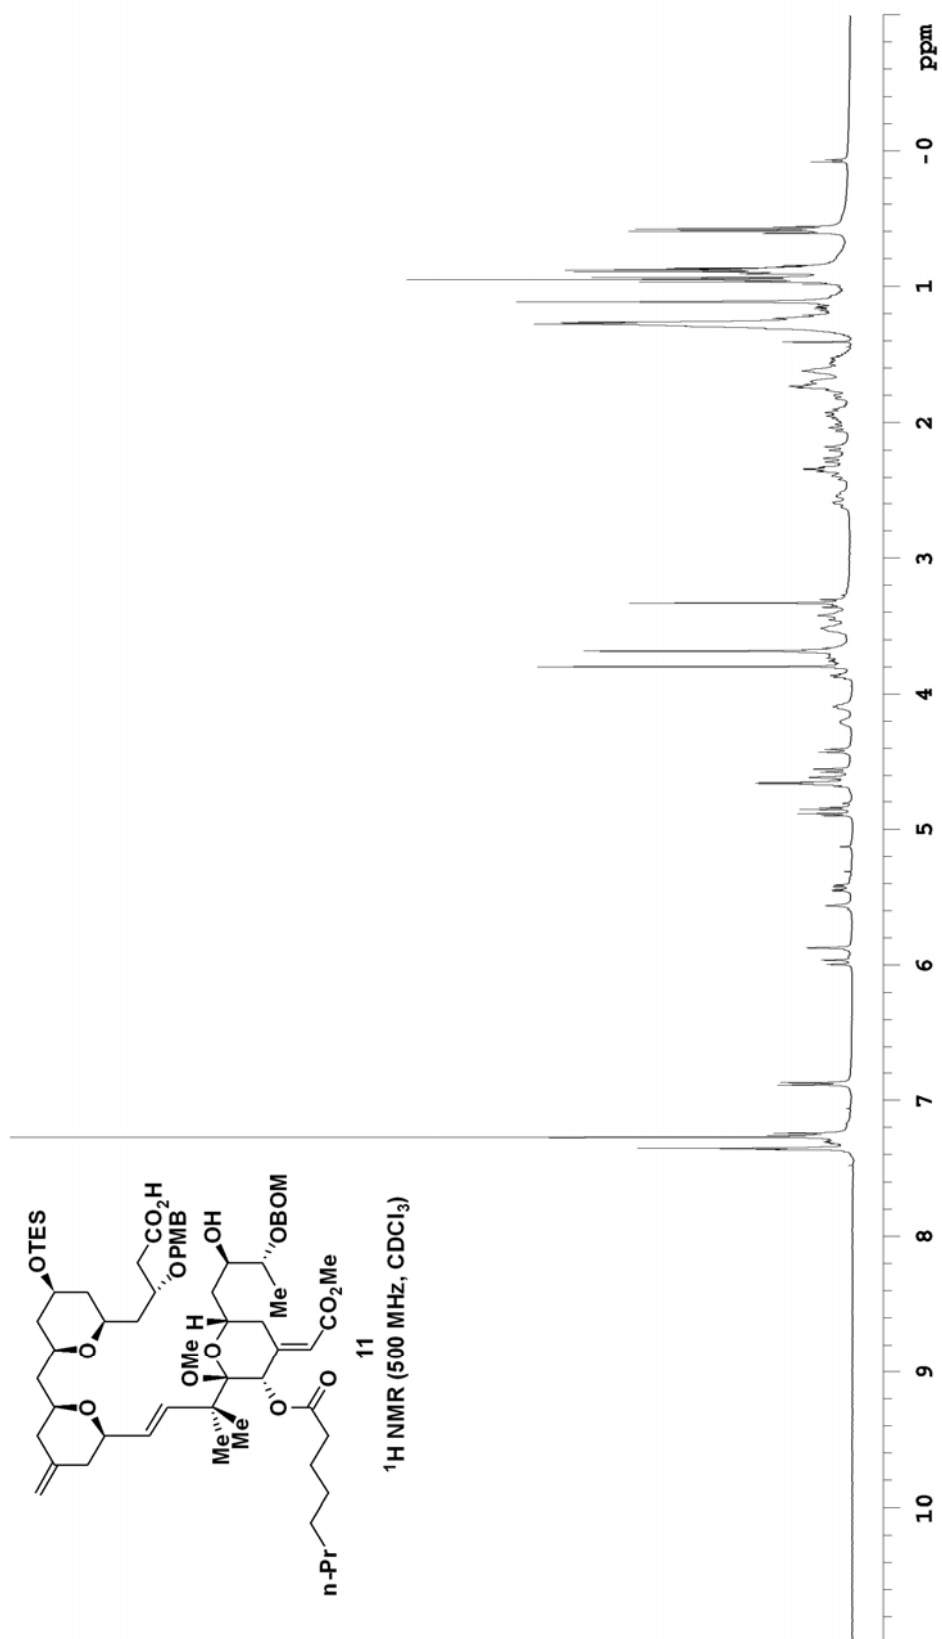

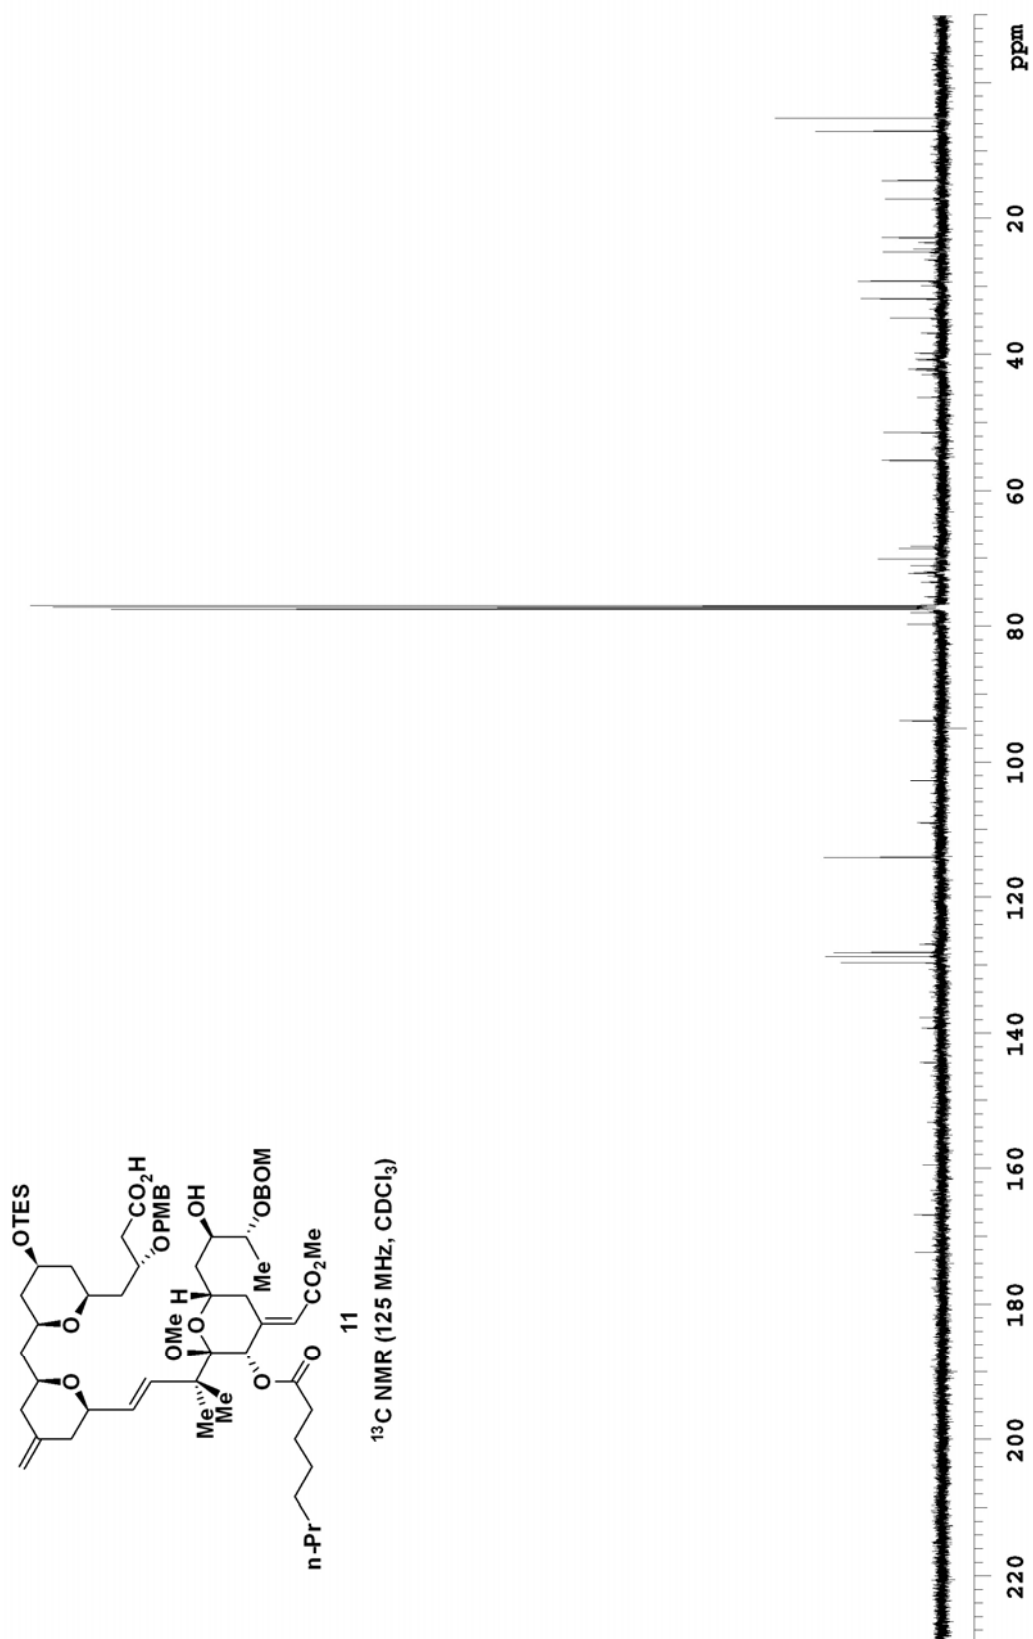



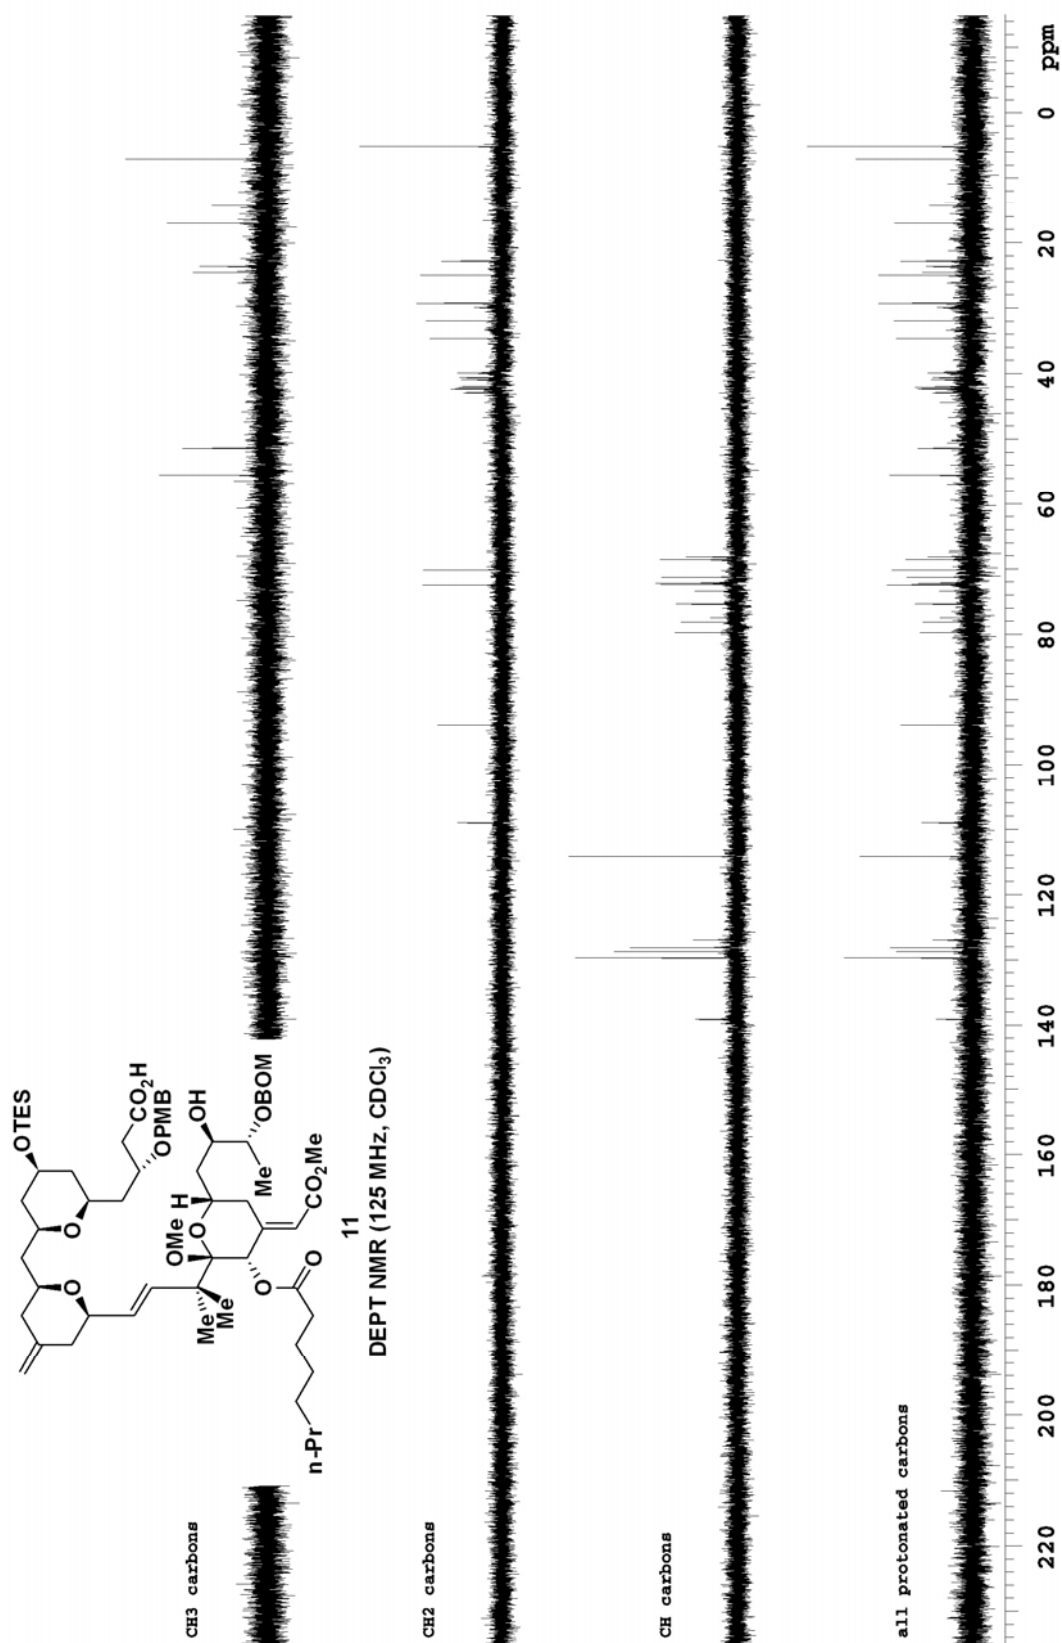

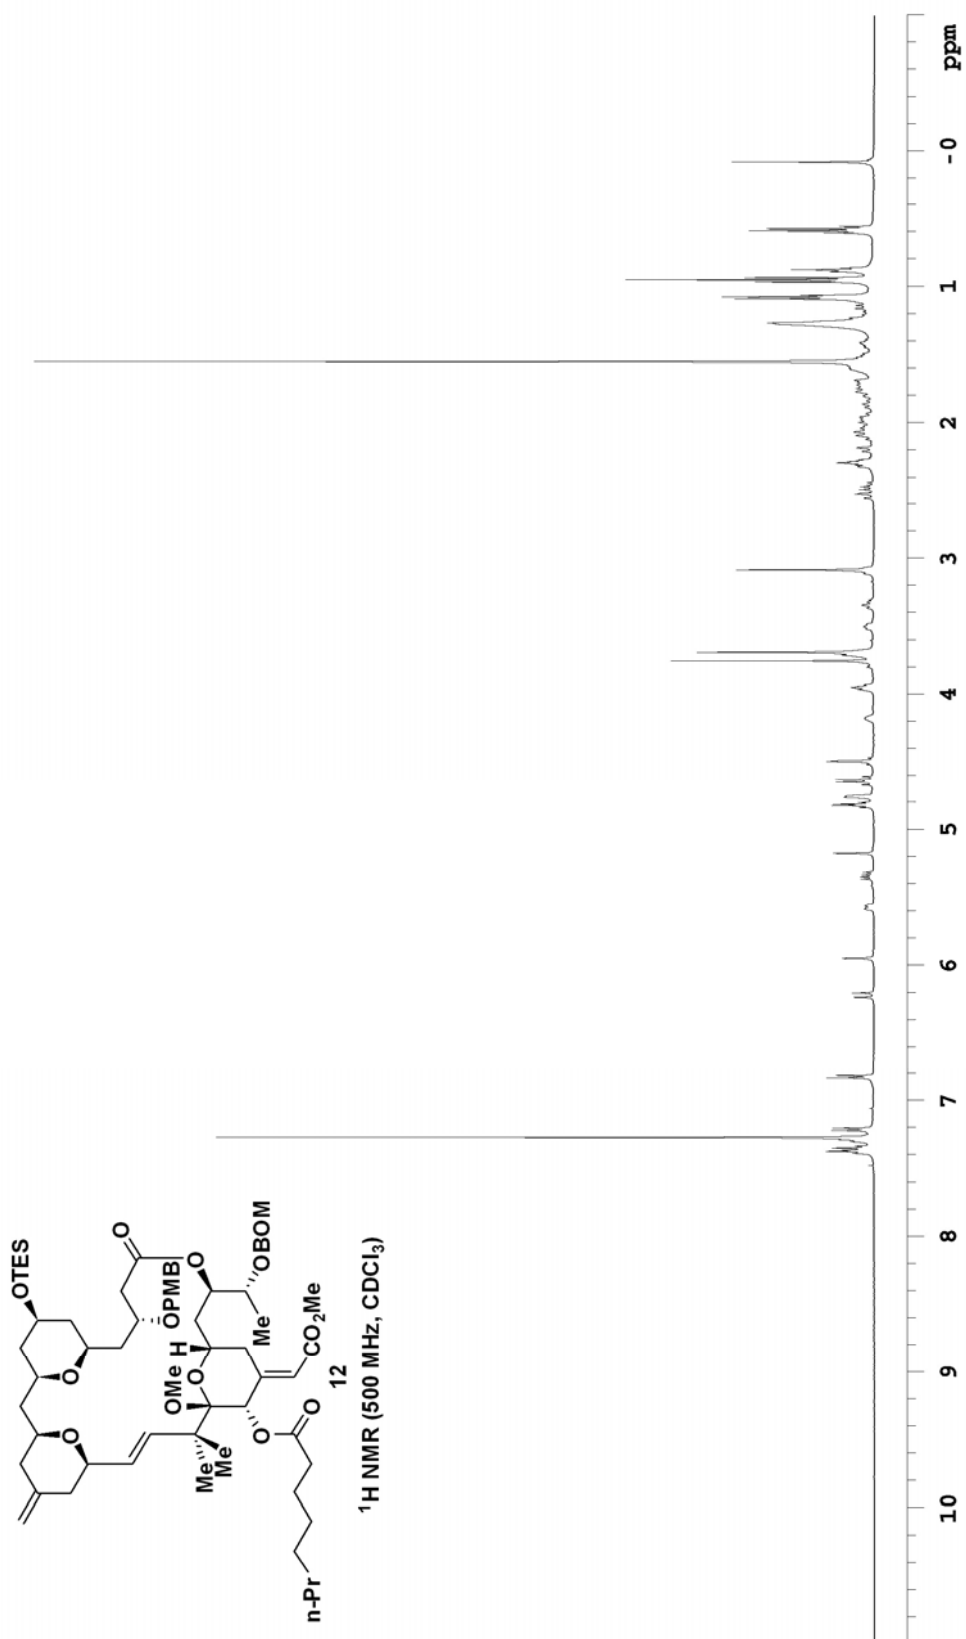

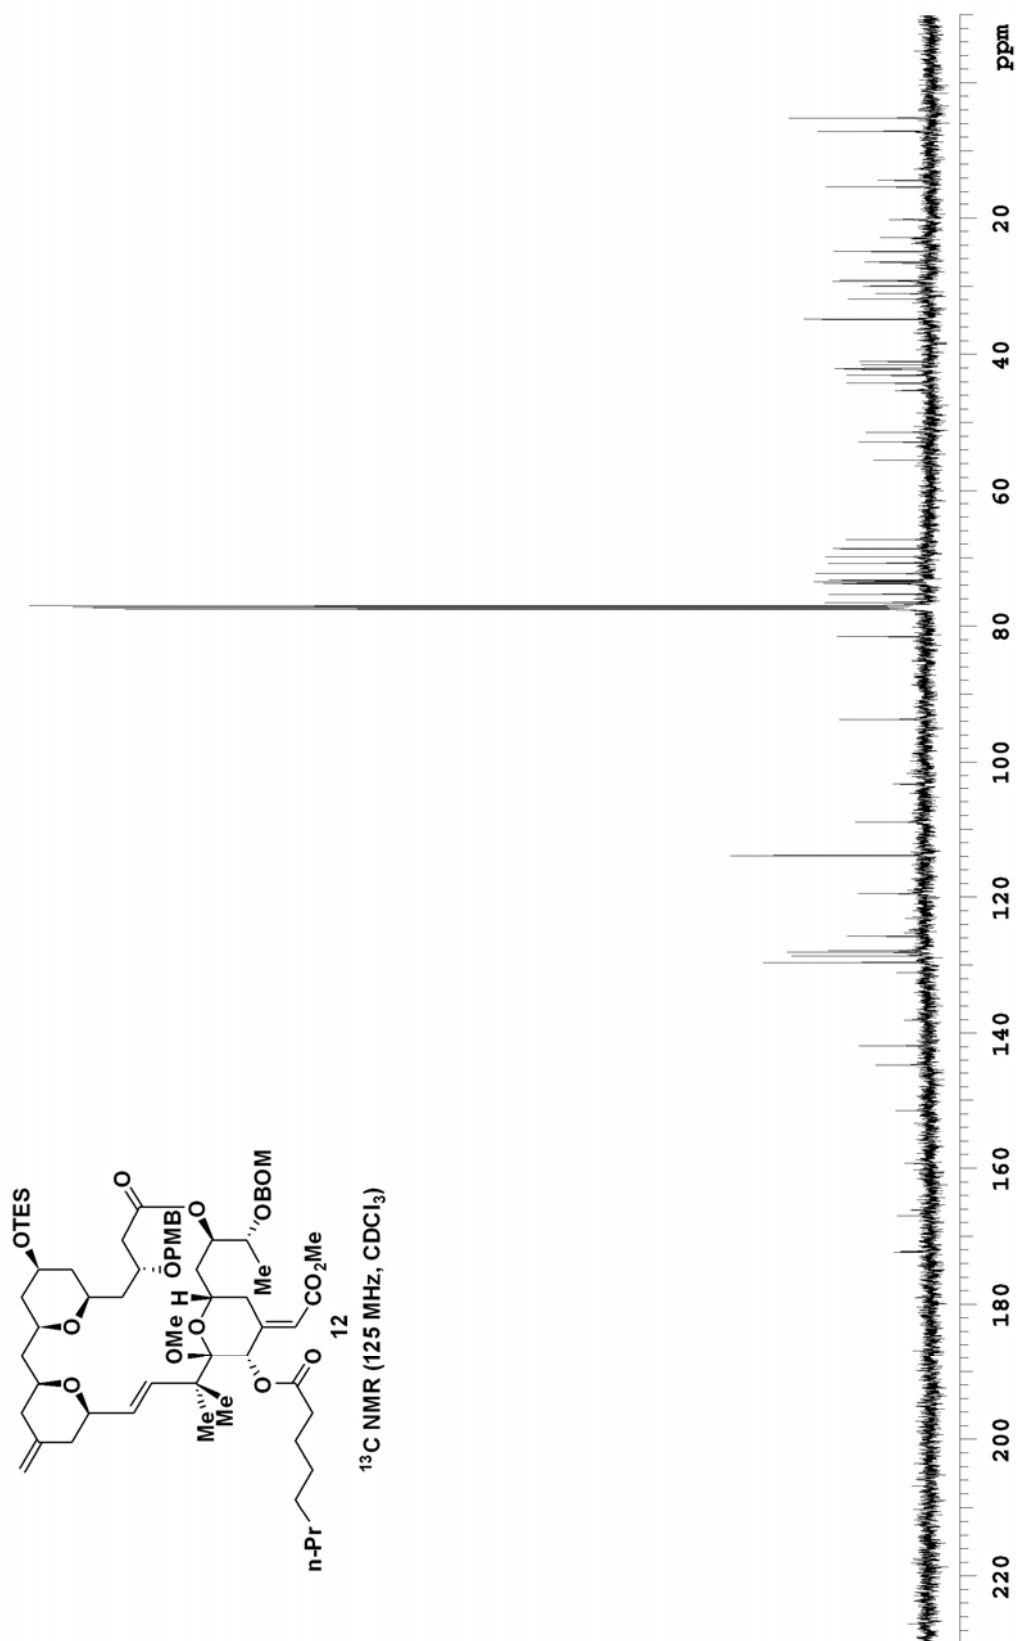

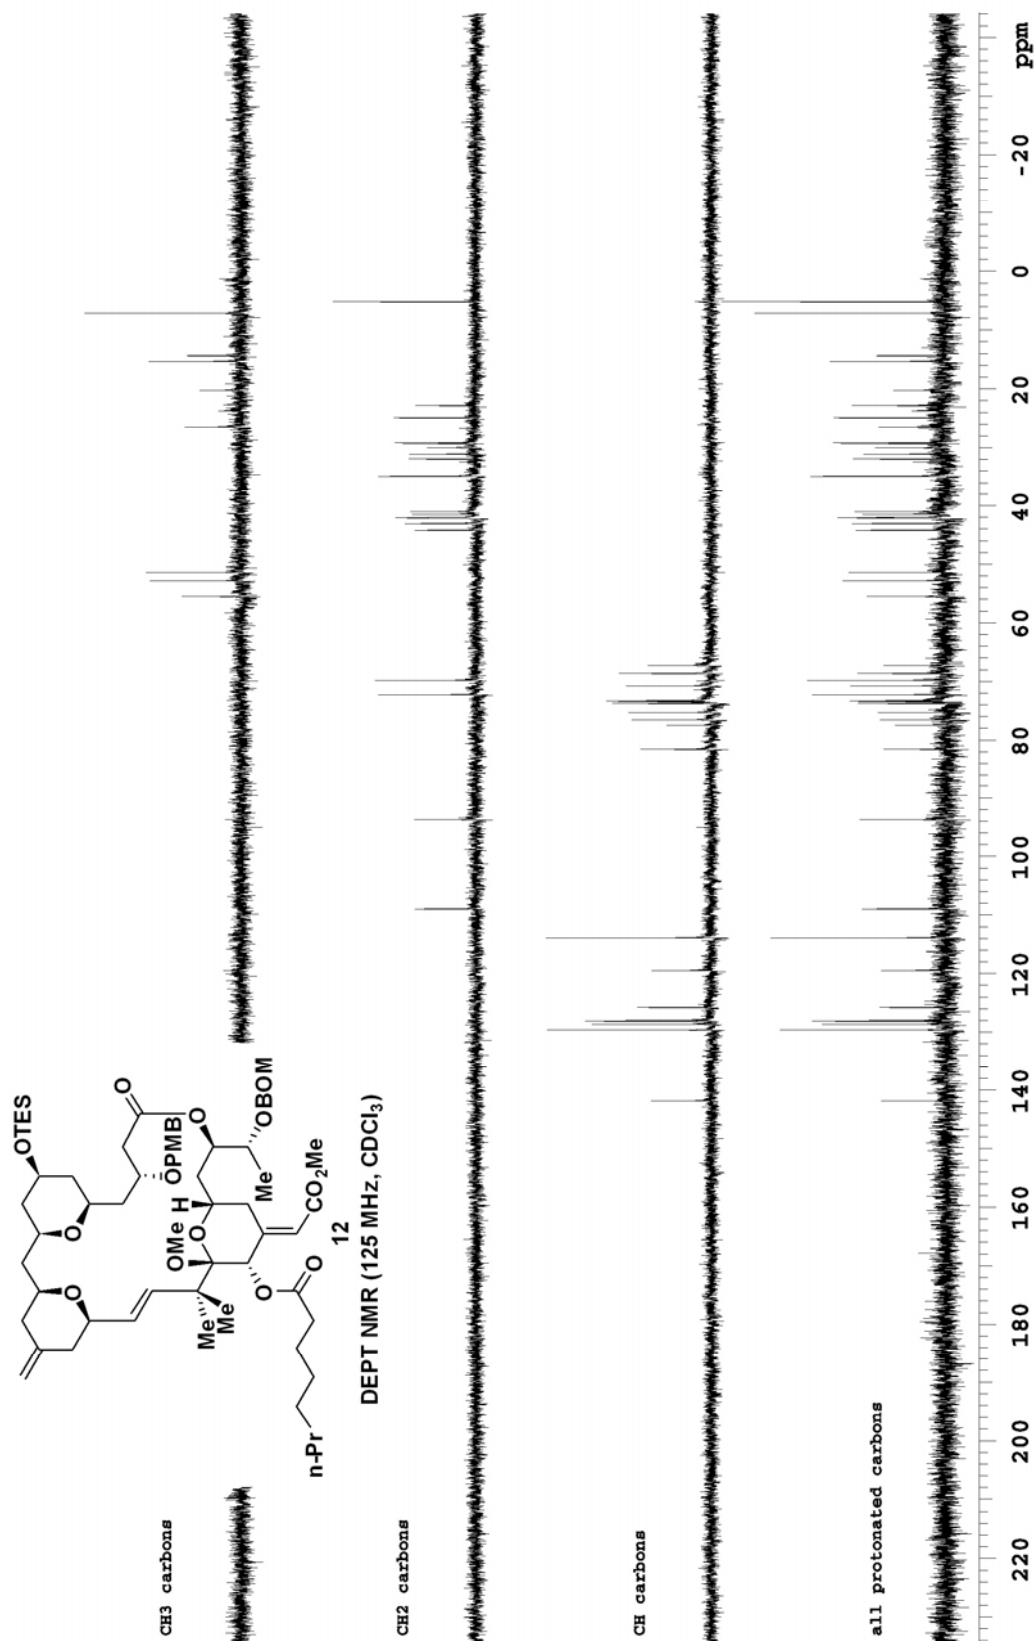

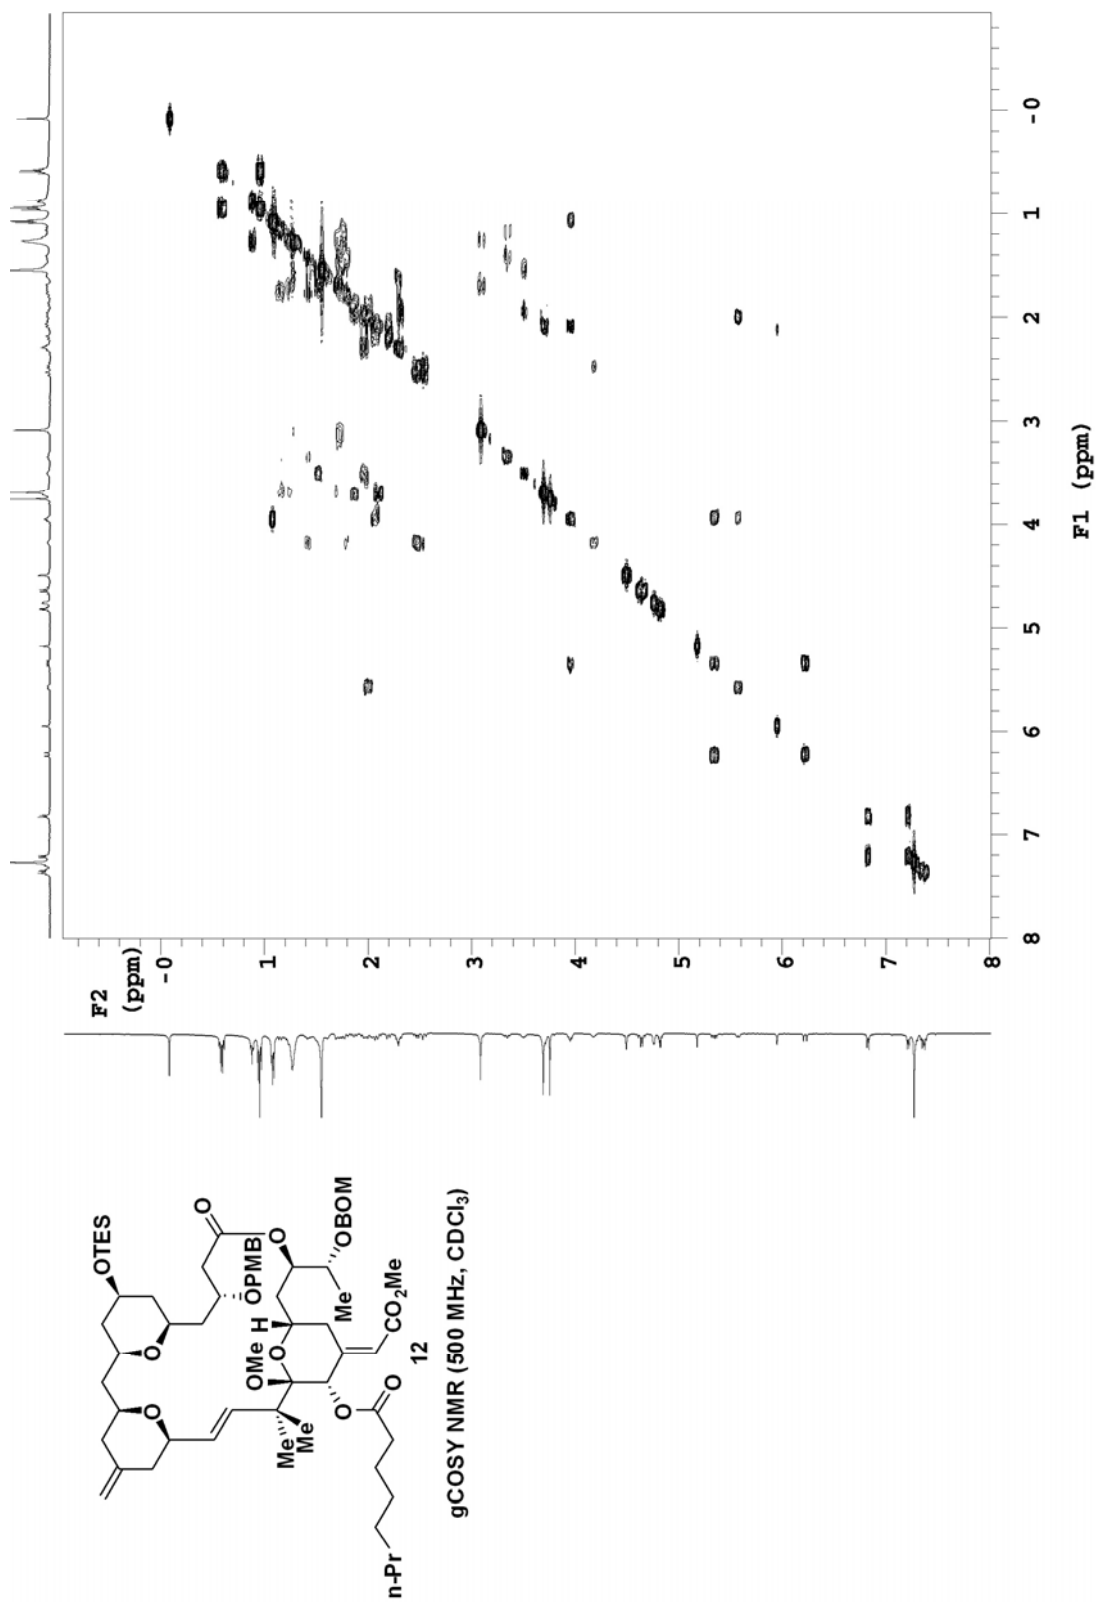

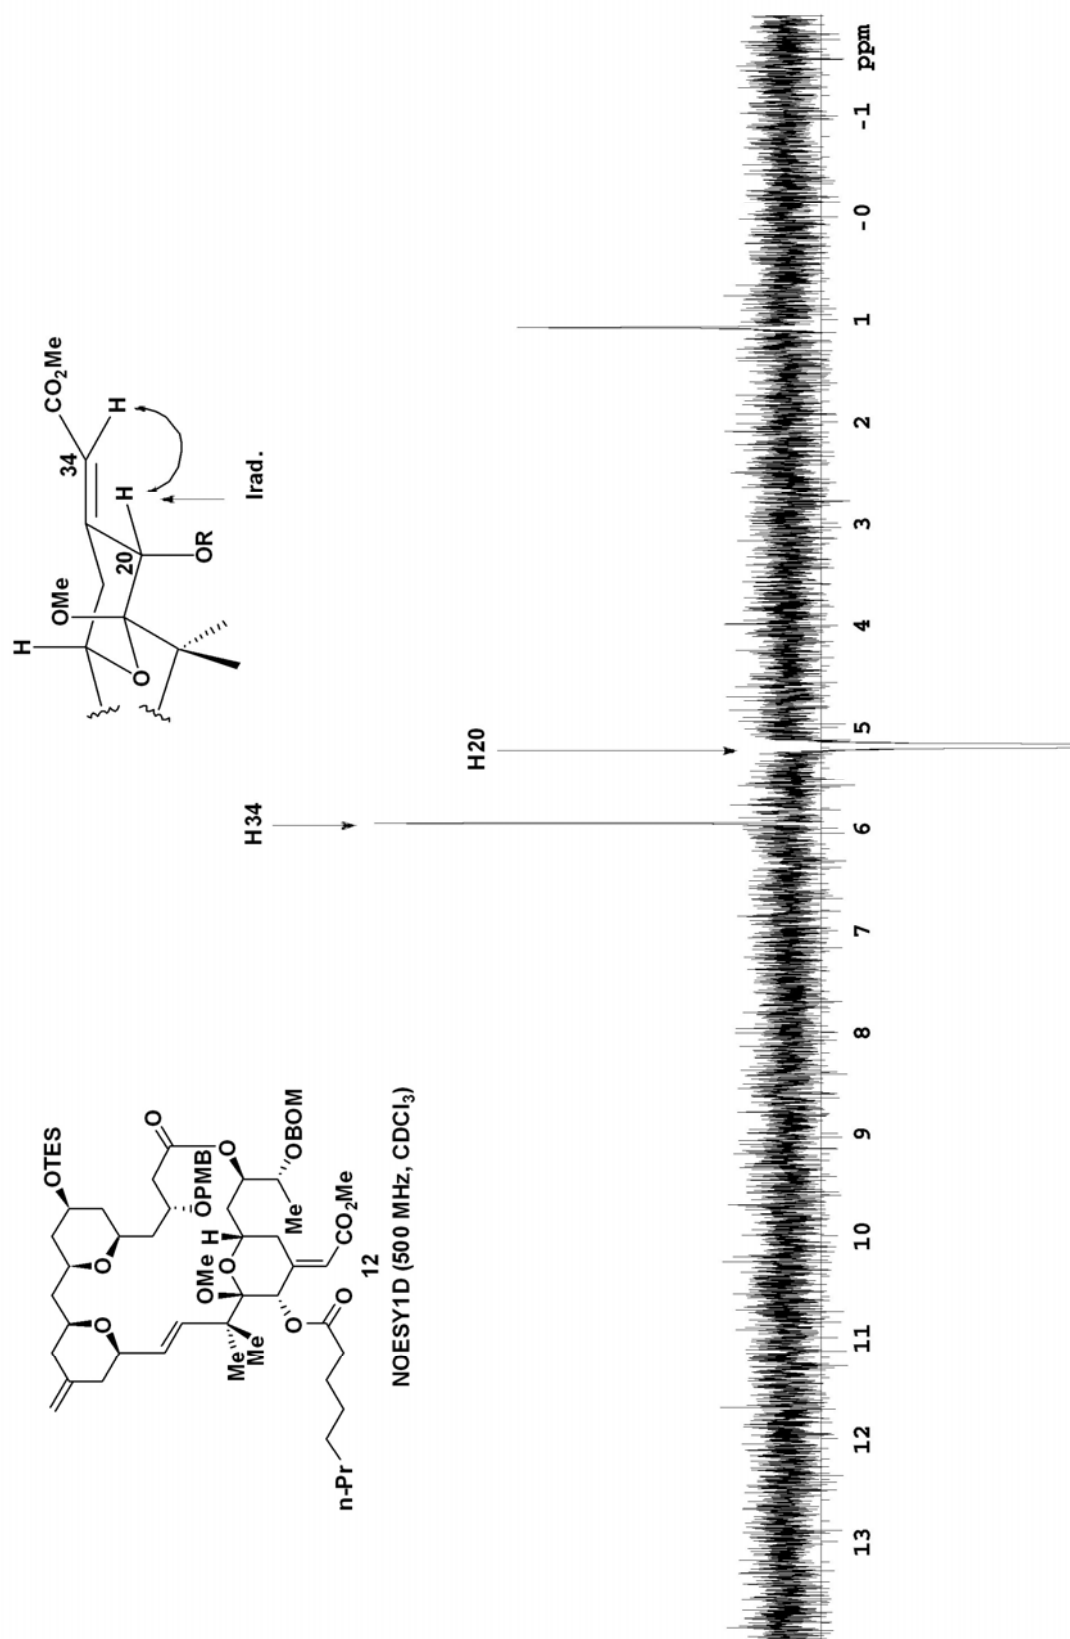

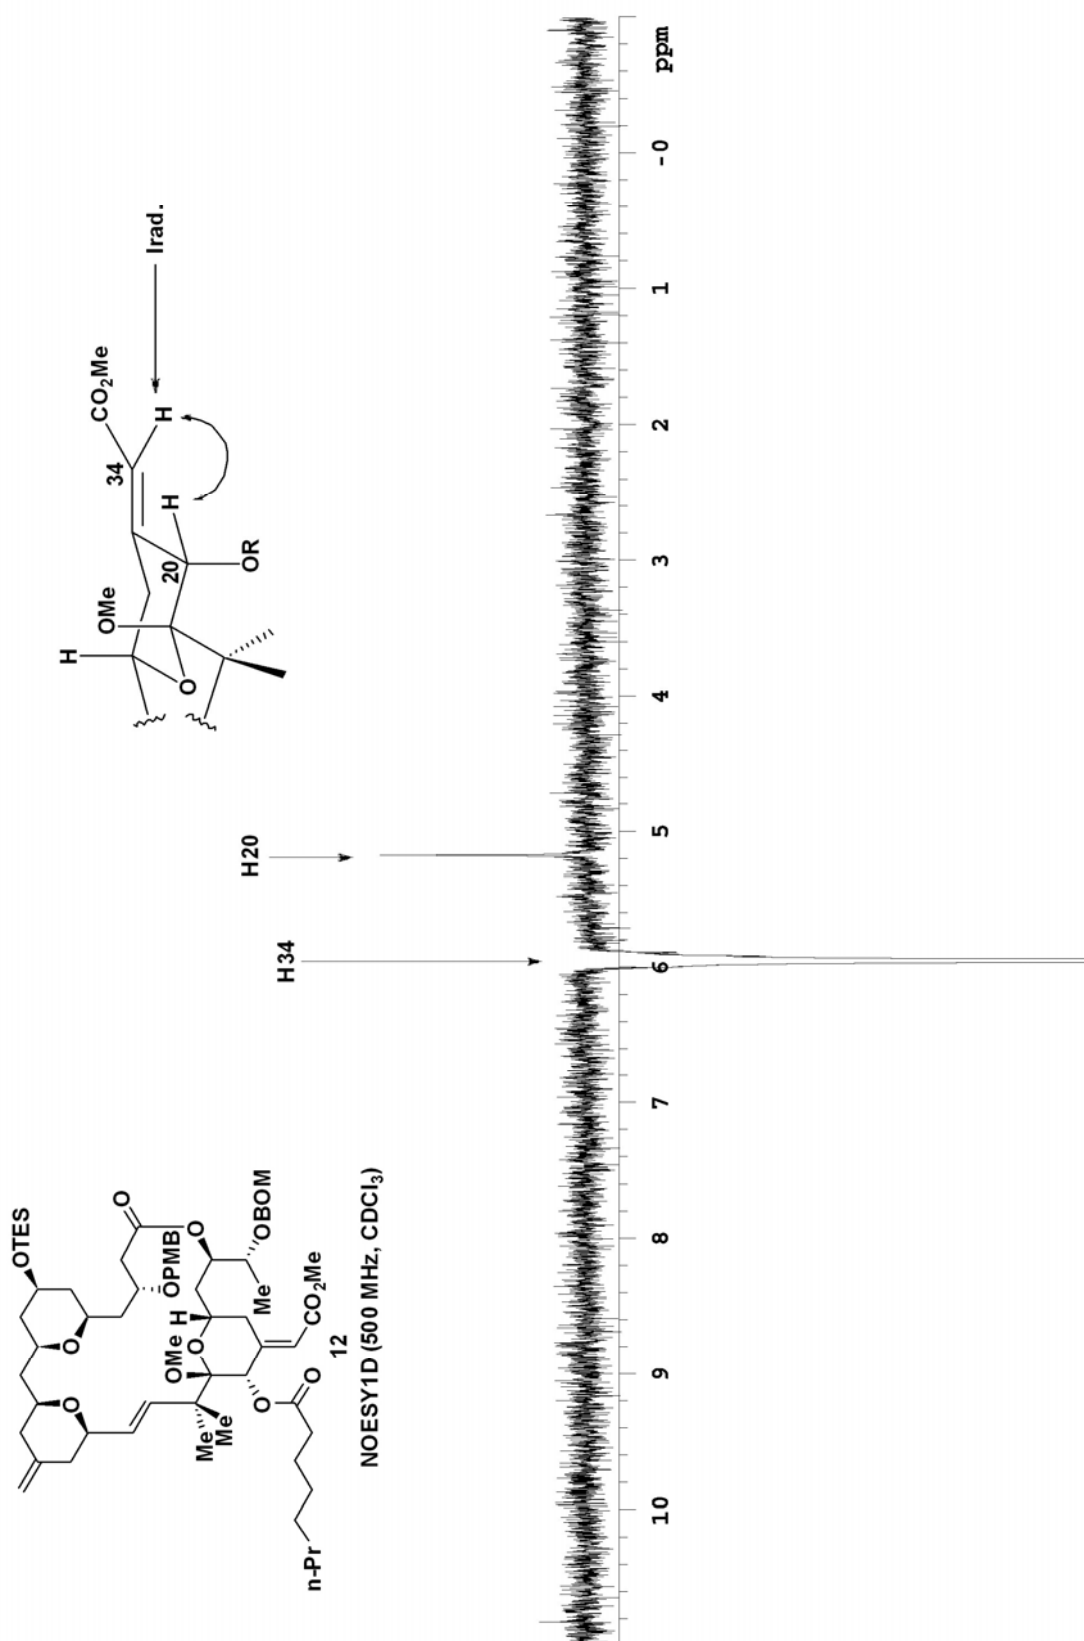

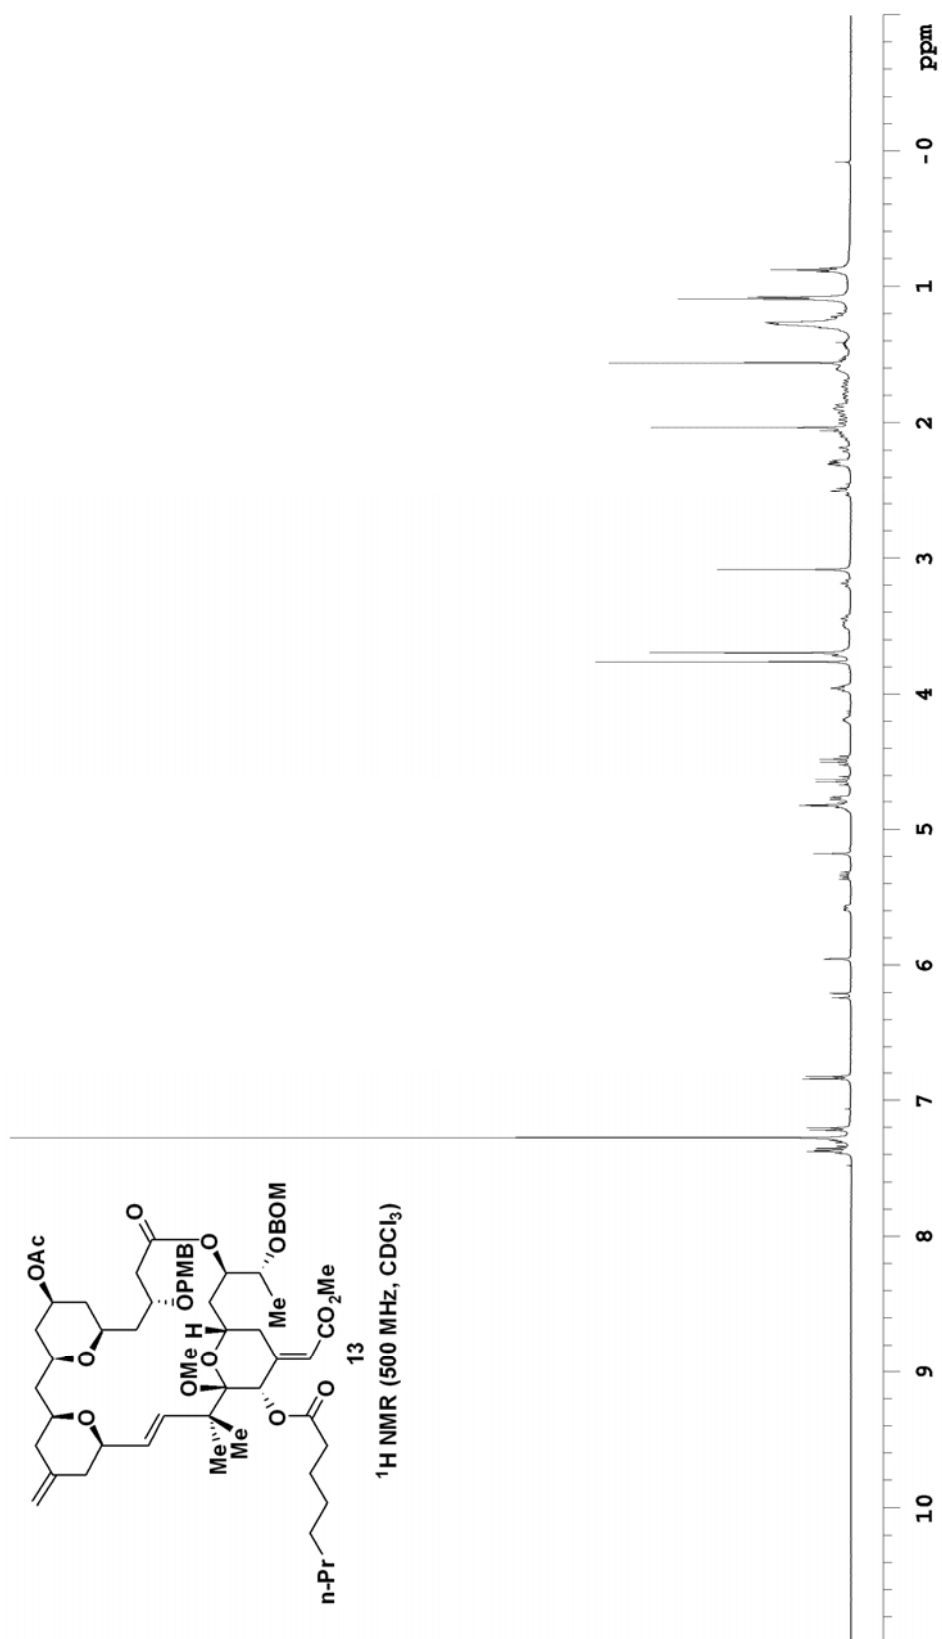



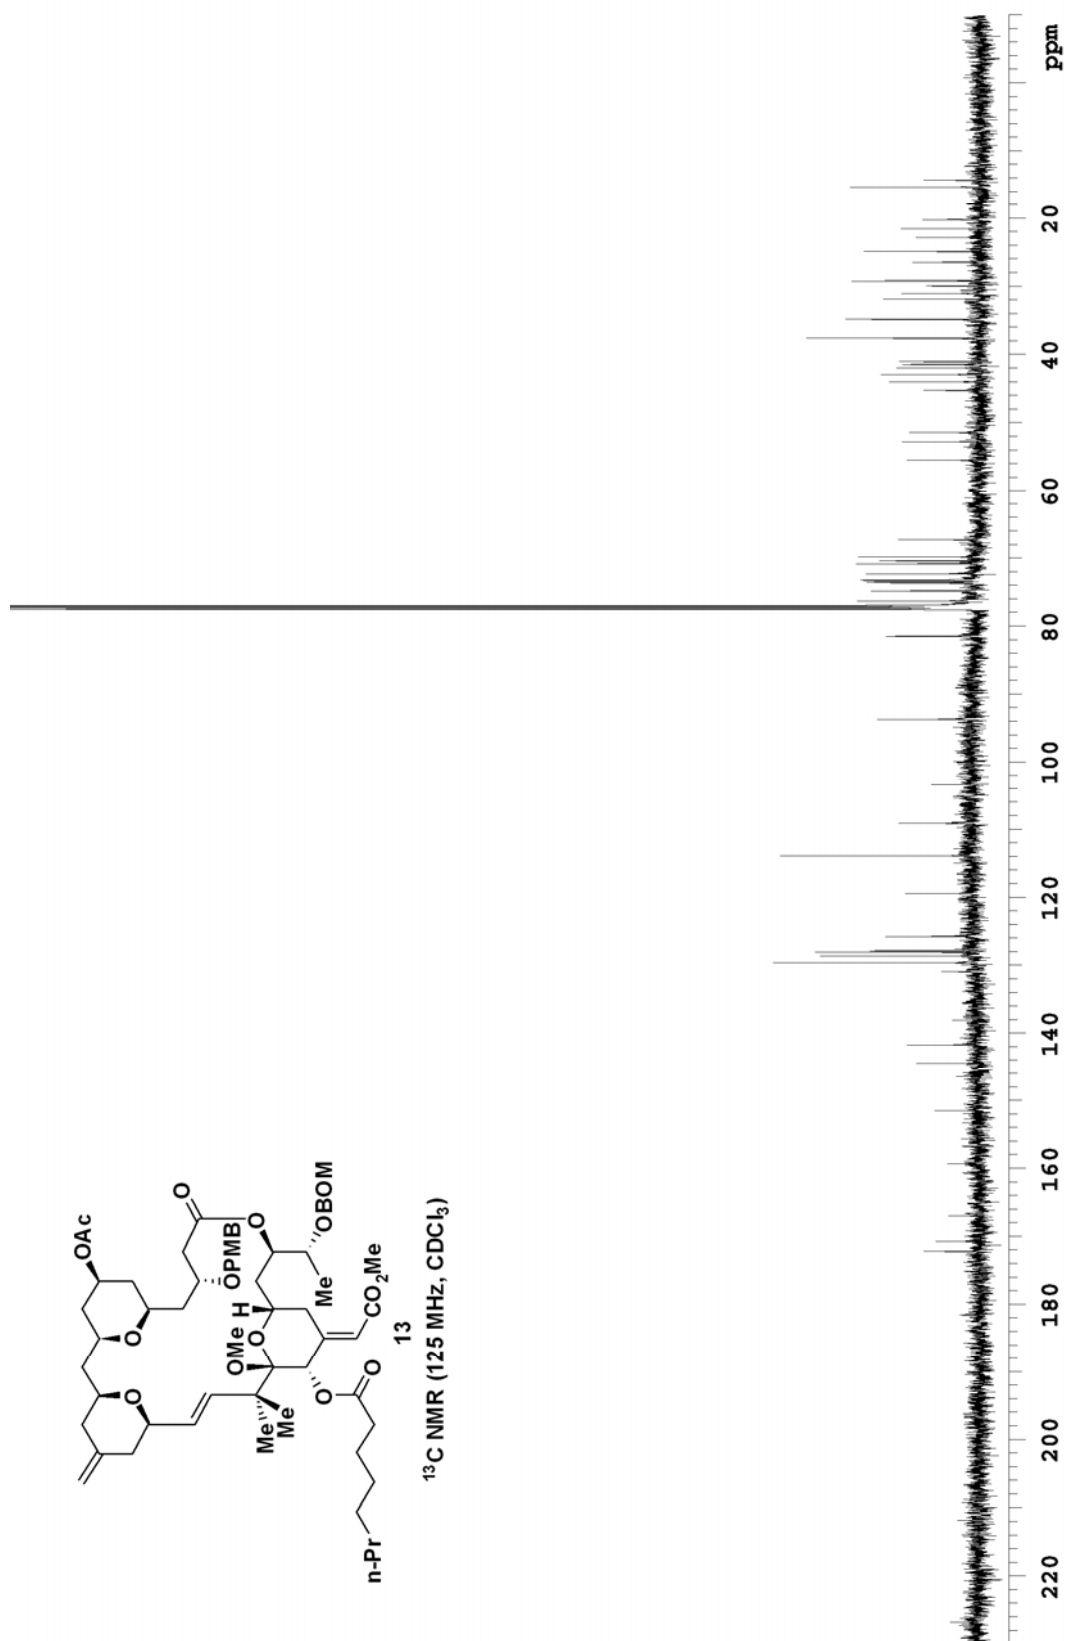



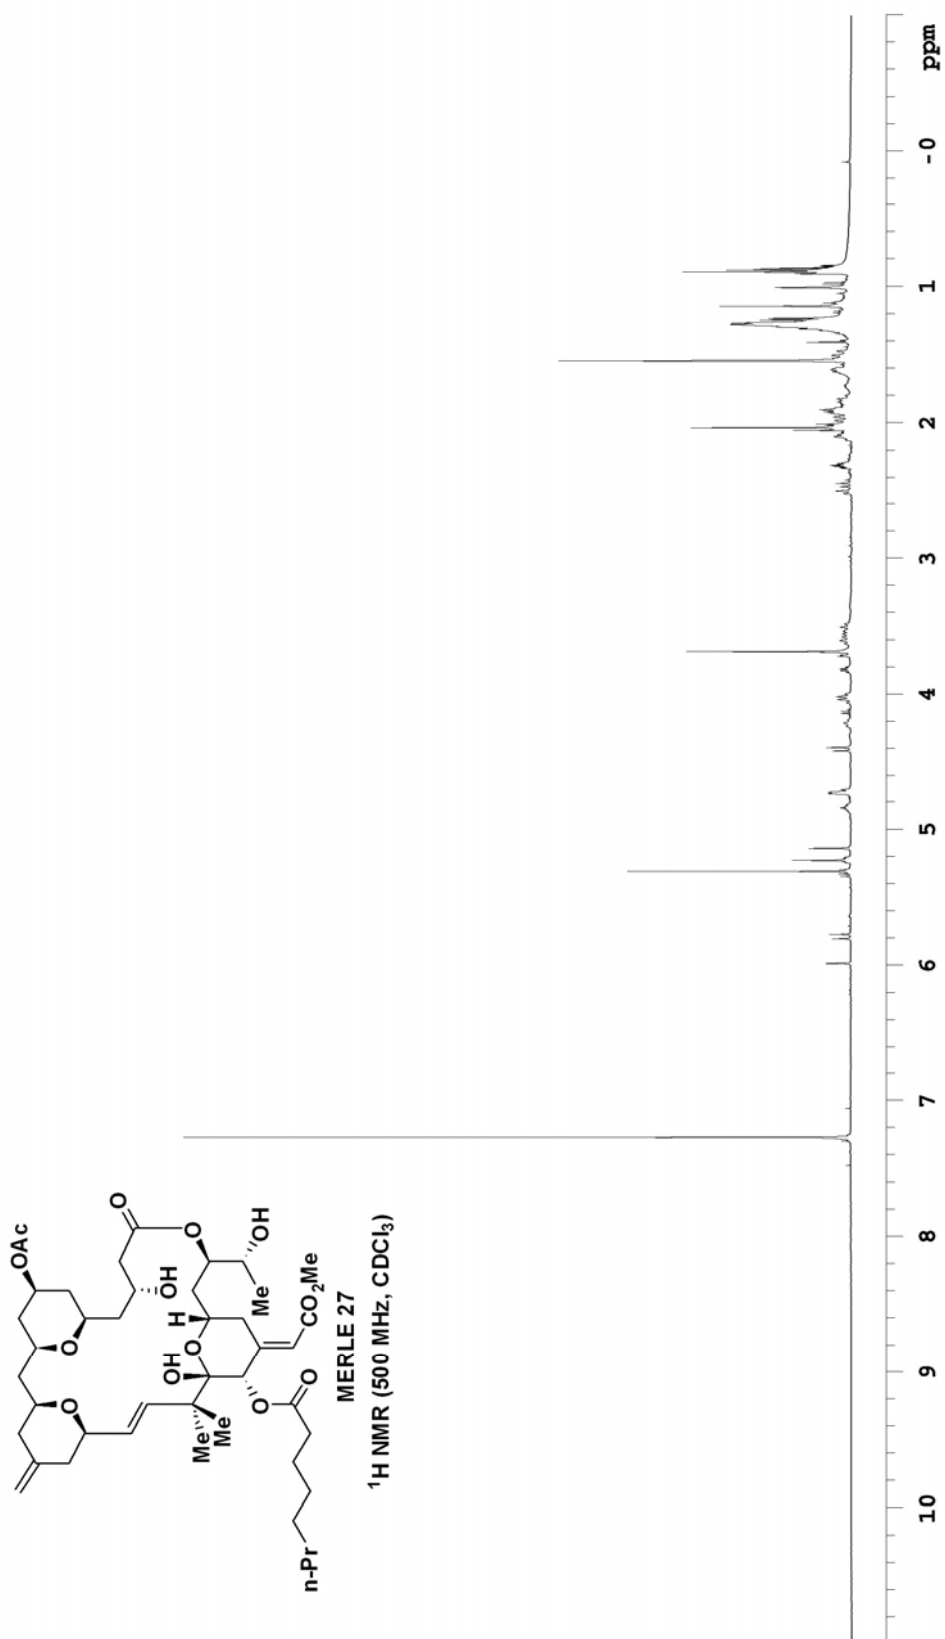

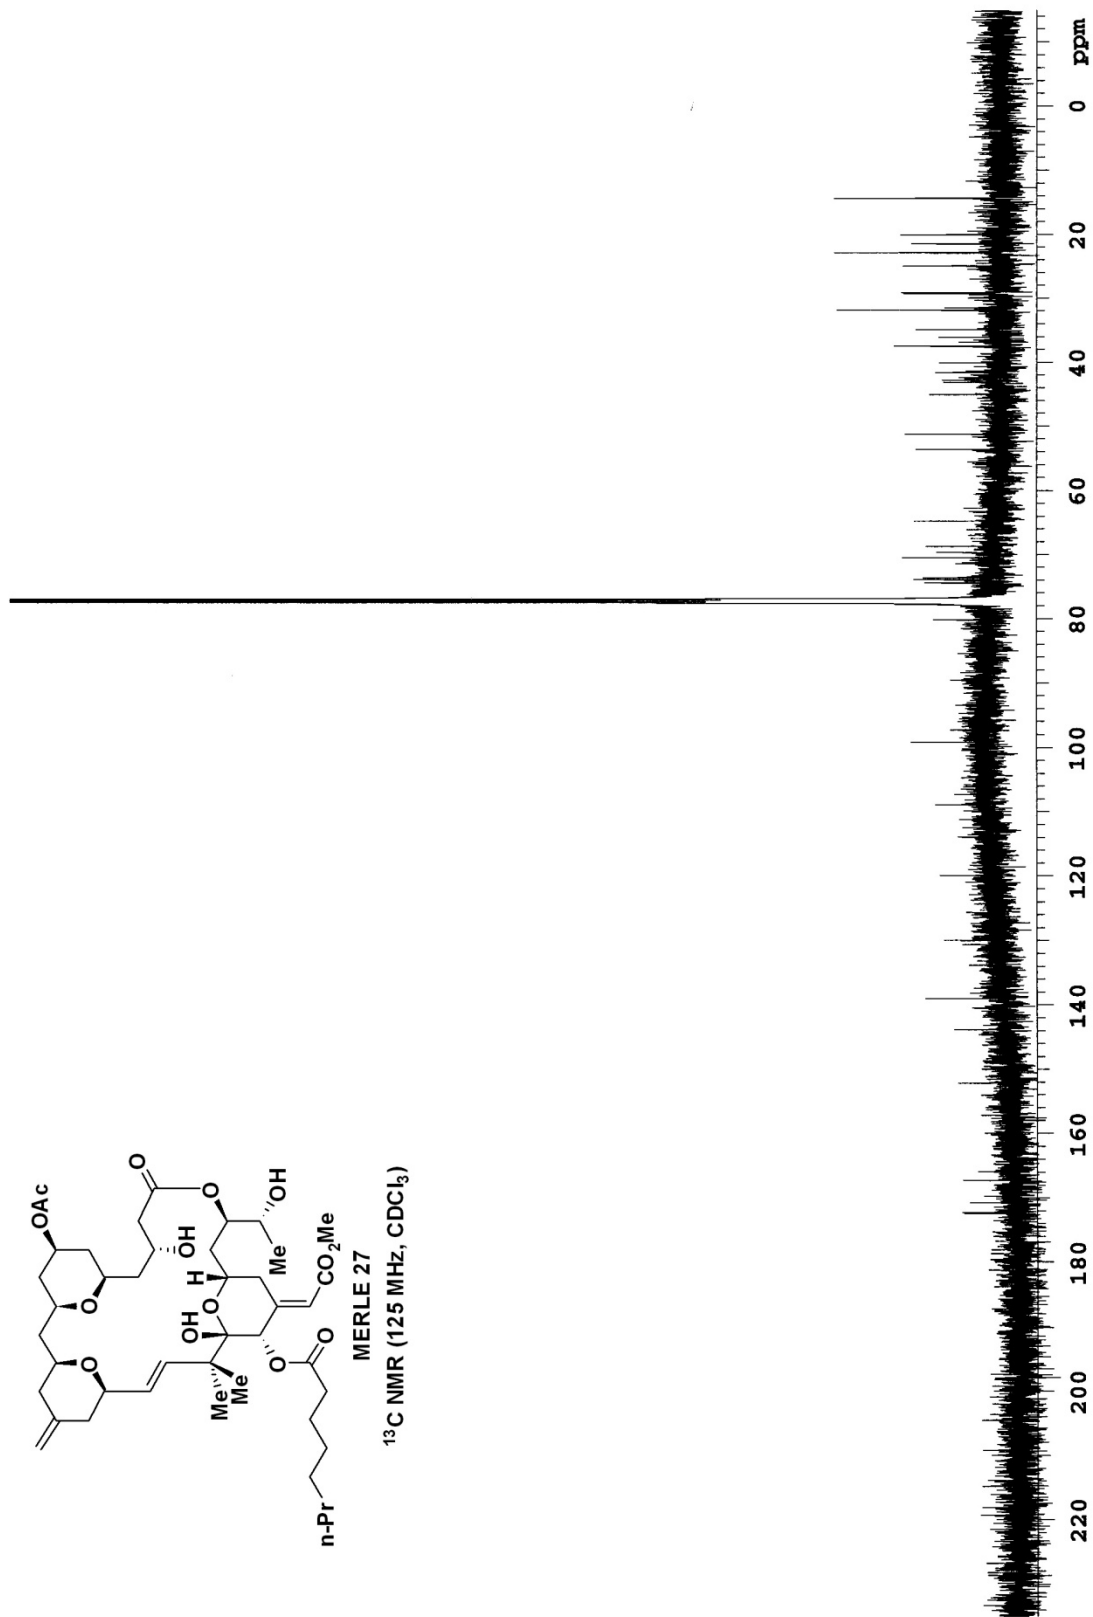

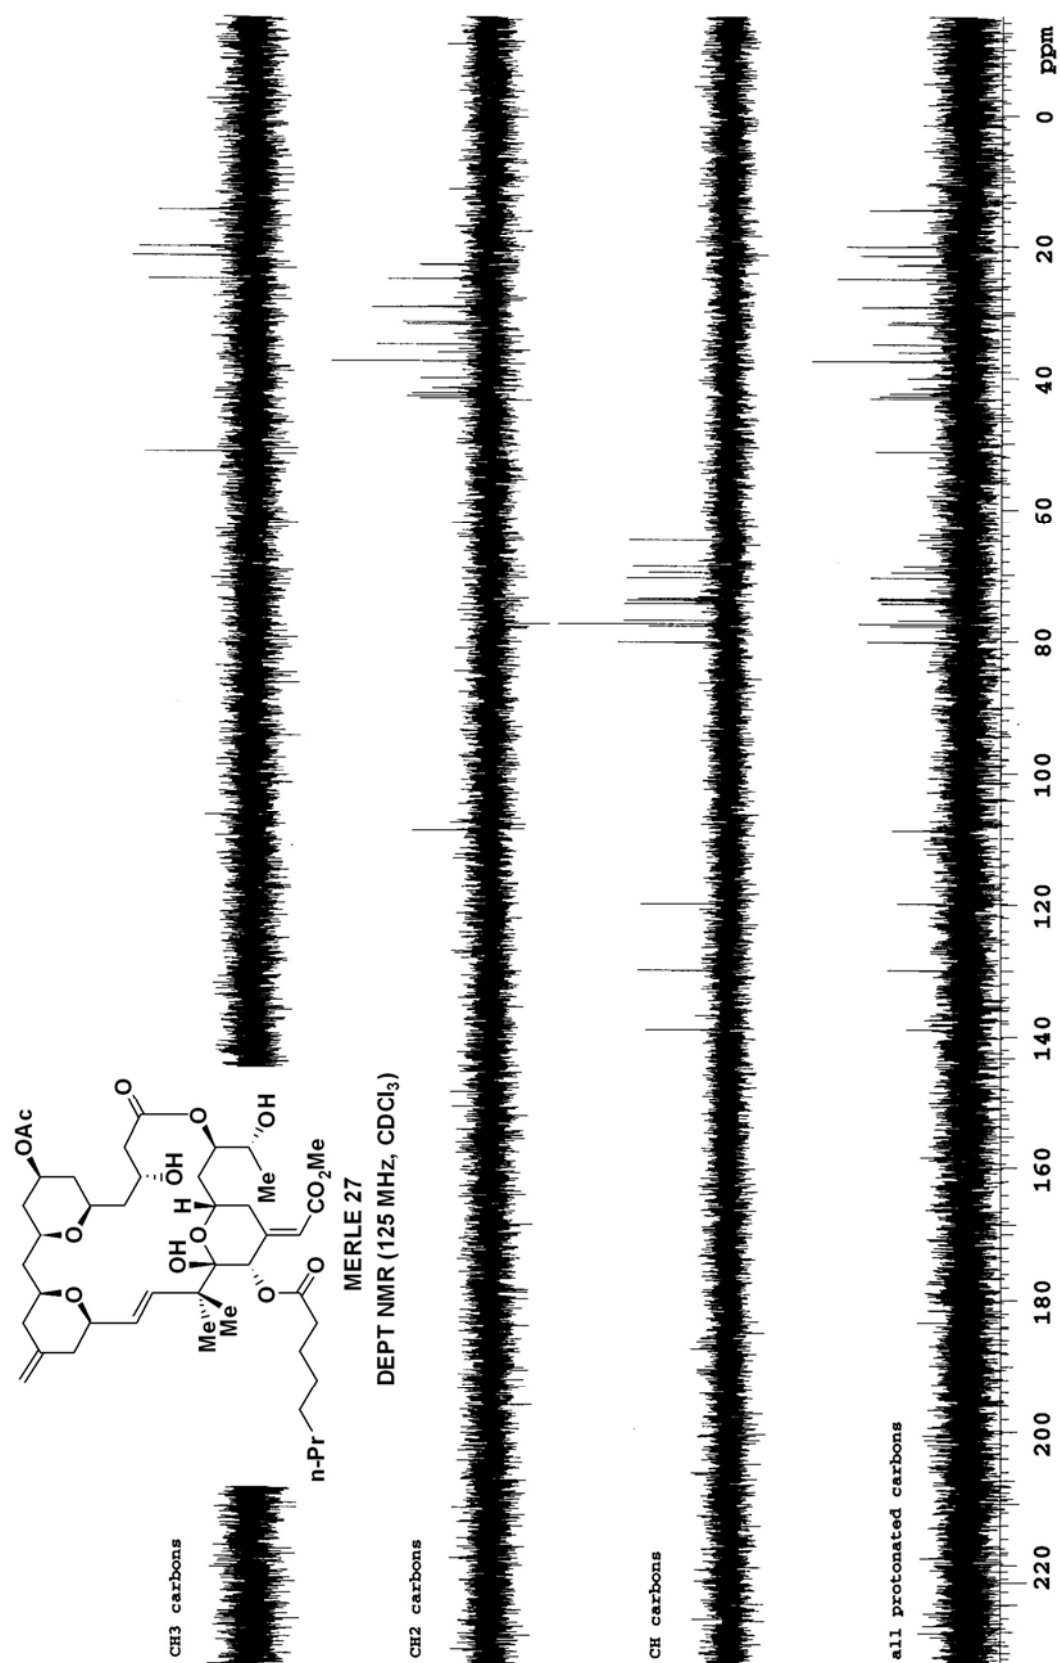

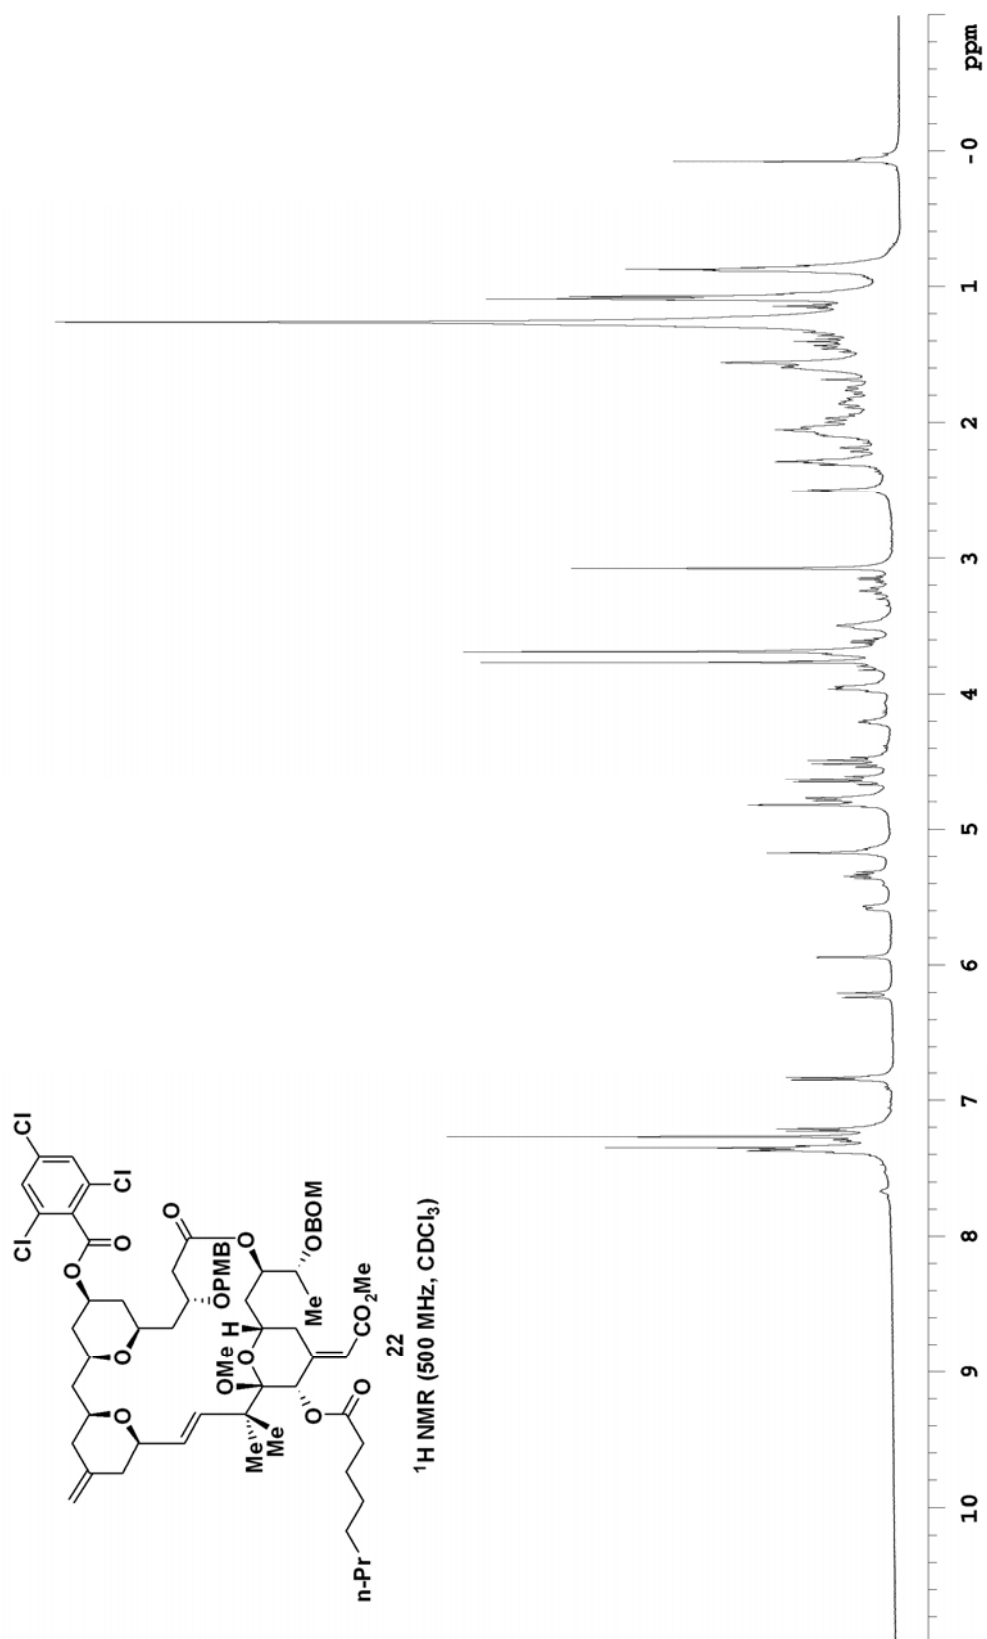

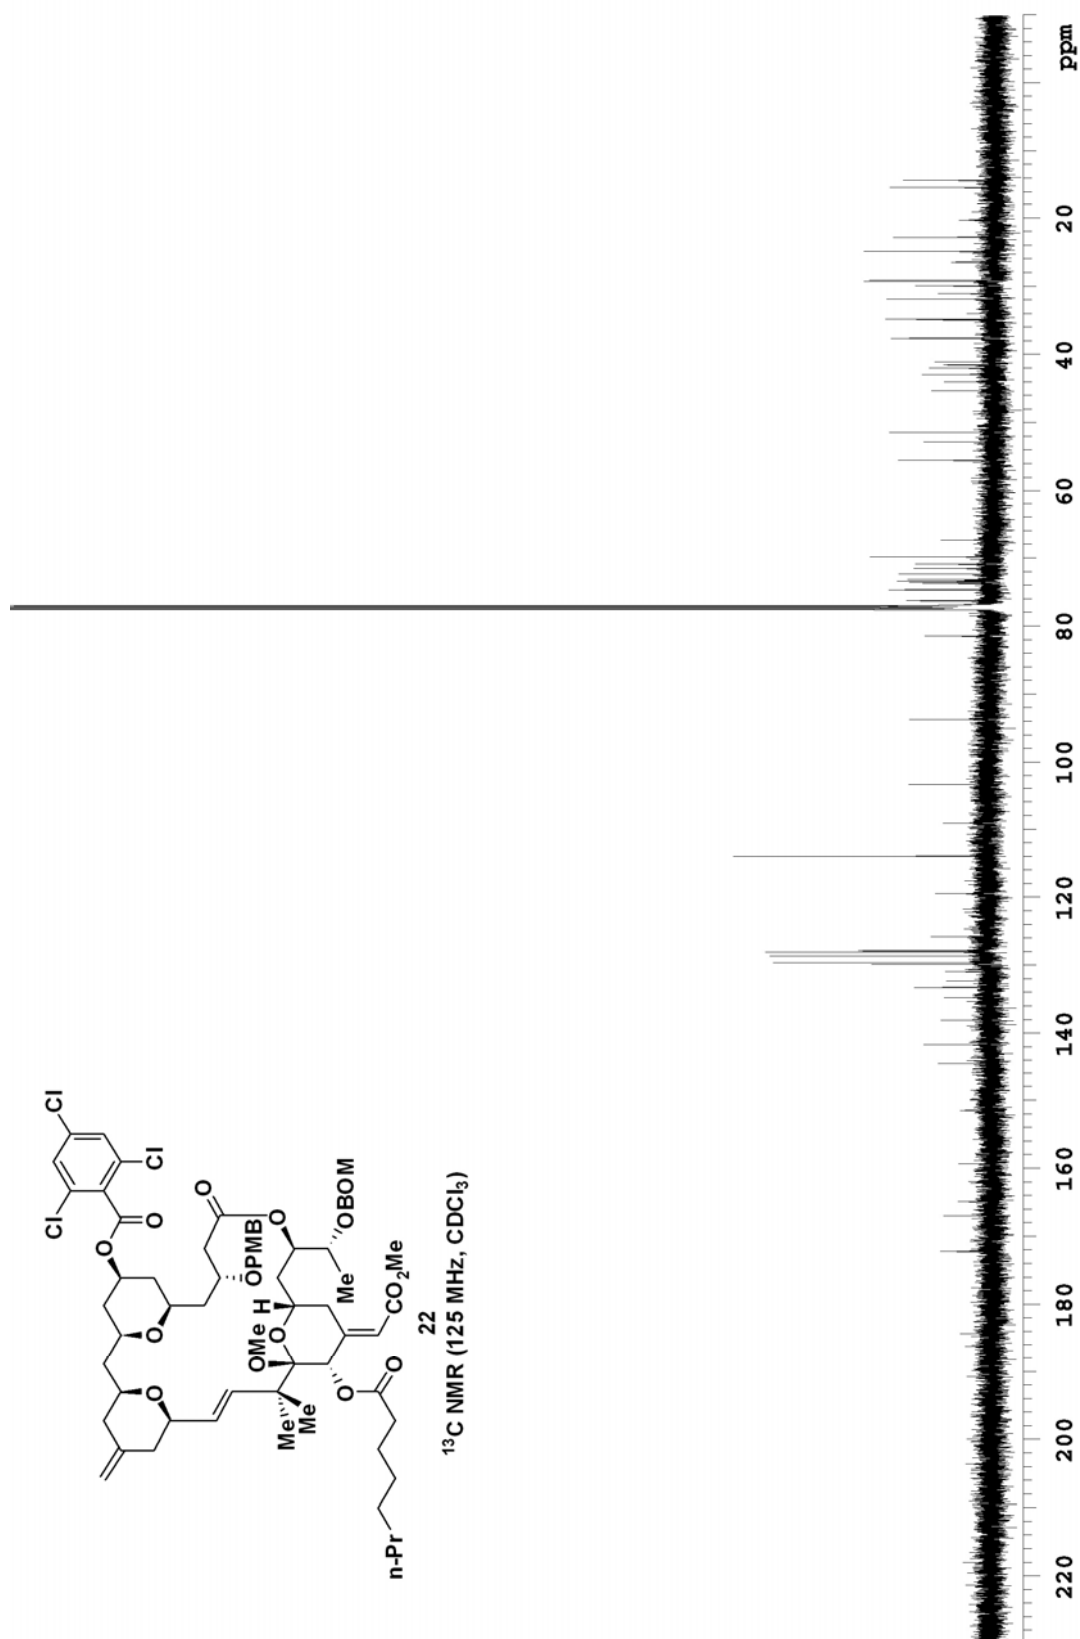

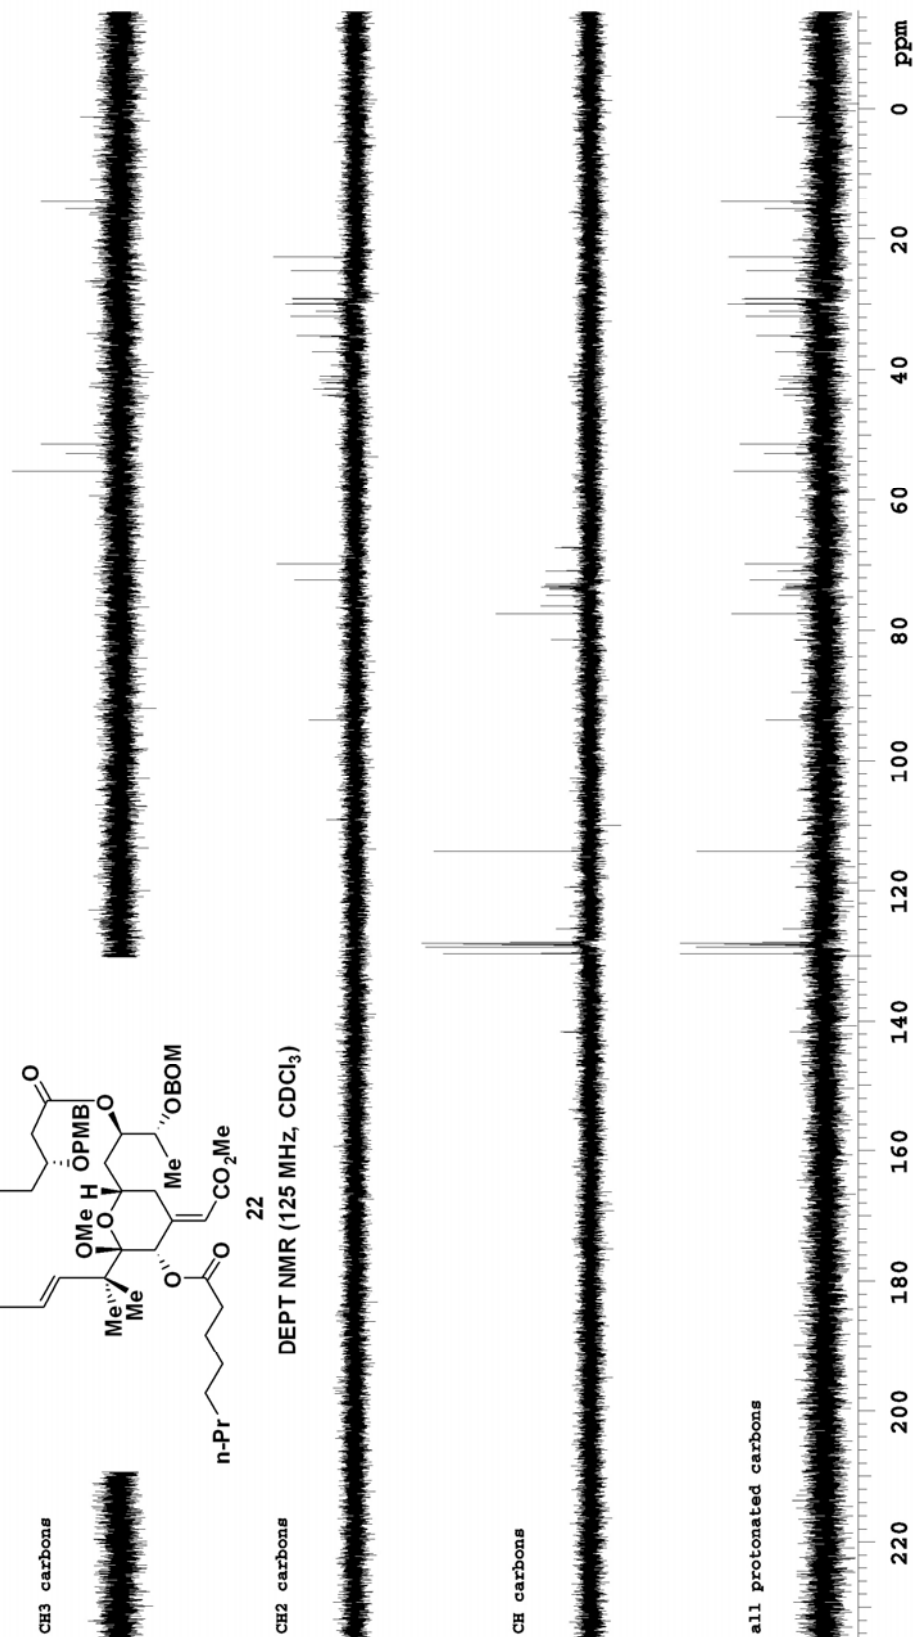



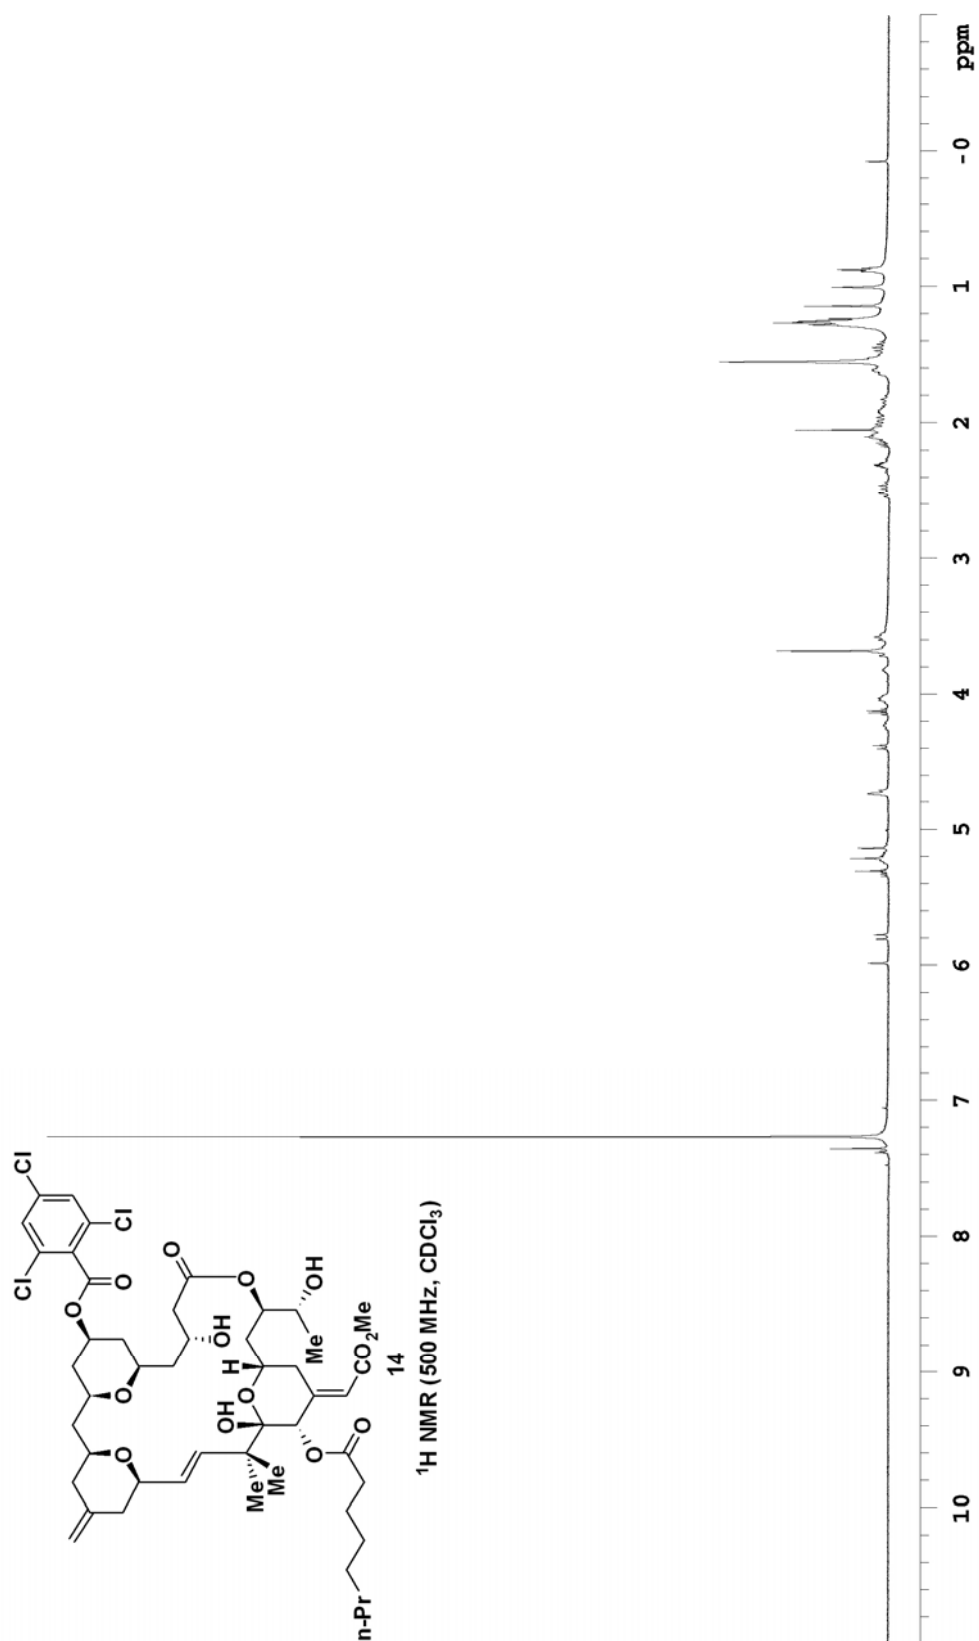

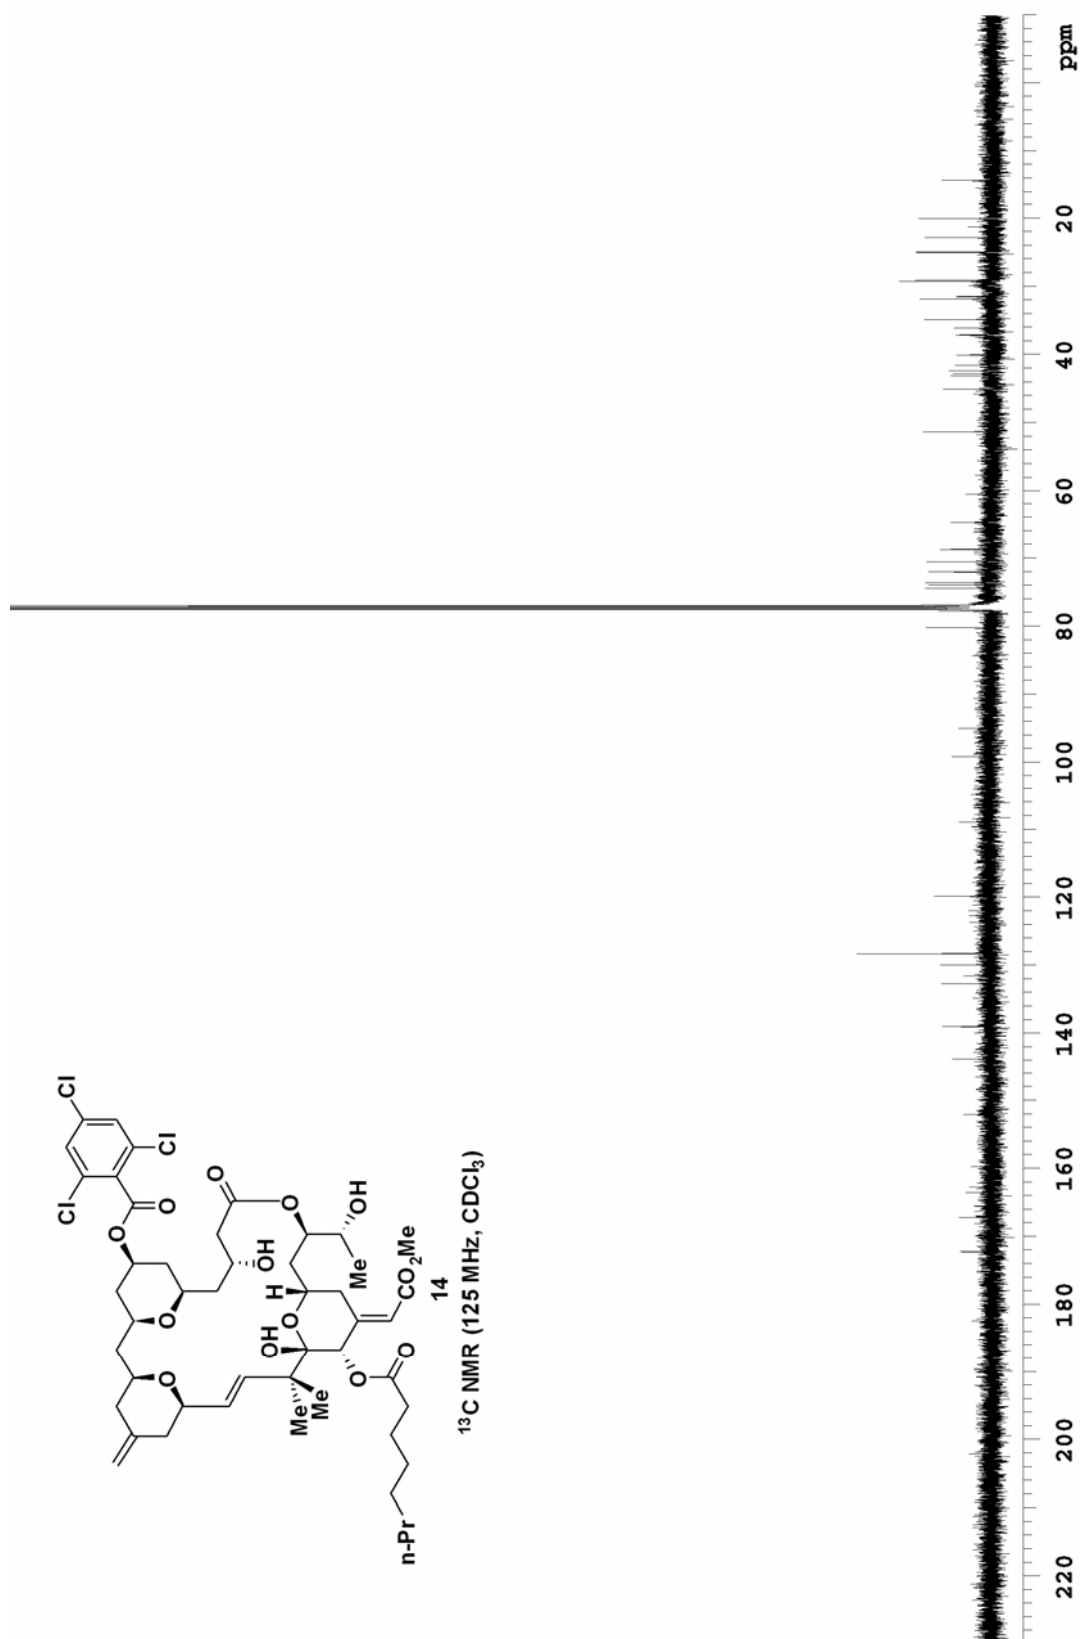

Supplement: Supplementary file 1 [file 4550332]
